# Supplementary material
Source: PubMed Central journal article supplement (PMC3070548)
Supplement: mmc4.pdf [file mmc4.pdf]

**Supplemental Table 1.** List of antibodies.

| <b>Antigen</b>  | <b>Dilution</b> | <b>Manufacturer</b> | <b>Species</b>      | <b>Cat no.</b> |
|-----------------|-----------------|---------------------|---------------------|----------------|
| MYOF            | 1:200           | Atlas antibodies    | rabbit              | HPA014245      |
| VIM             | 1:1000          | Dako                | mouse               | M7020          |
| VIM             | 1:2000          | Abcam               | rabbit              | ab45939        |
| KRT7            | 1:1000          | Dako                | mouse               | M7018          |
| KRT19           | 1:1000          | Ventana             | mouse               | 760-4281       |
| CD133           | 1:200           | Atlas antibodies    | rabbit              | HPA004922      |
| CD133           | 1:30            | Abcam               | rabbit              | ab16518        |
| XPNPEP2         | 1:1000          | Atlas antibodies    | rabbit              | HPA000339      |
| SUSD2           | 1:400           | Atlas antibodies    | rabbit              | HPA004117      |
| HNF1            | 1:200           | Santa Cruz          | rabbit              | sc-8986        |
| BCL2            | 1:100           | Santa Cruz          | mouse               | sc-509         |
| CD24            | 1:40            | Santa Cruz          | mouse               | sc-19585       |
| Alexa Fluor 488 | 1:300           | Invitrogen          | goat anti-mouse     | A11029         |
| Alexa Fluor 594 | 1:300           | Invitrogen          | chicken anti-rabbit | A21442         |
