# Supplementary material
Source: PubMed Central journal article supplement (PMC3070548)
Supplement: mmc5.pdf [file mmc5.pdf]

**Supplemental Table 2. Probes with >two-fold difference in all of the three ALDH sorted pairs.**

| Reported Id  | Gene.Symbo | Accession      | LocusLink | R_001_N | R_002_N | R_003_N | mean.dif (log2) |
|--------------|------------|----------------|-----------|---------|---------|---------|-----------------|
| ILMN_1656057 | PLAU       | NM_002658.2    | 5328      | 4.676   | 5.3636  | 6.6754  | 5.572           |
| ILMN_1810289 | FER1L3     | NM_133337.1    | 26509     | 5.0875  | 5.7521  | 4.9121  | 5.251           |
| ILMN_2396875 | IGFBP3     | NM_001013398.1 | 3486      | 4.1606  | 4.3597  | 6.515   | 5.012           |
| ILMN_1705814 | KRT80      | NM_182507.2    | 144501    | 5.1433  | 4.9273  | 4.5484  | 4.873           |
| ILMN_1746085 | IGFBP3     | NM_000598.4    | 3486      | 4.2529  | 3.9945  | 6.0999  | 4.782           |
| ILMN_1706519 | LAMC2      | NM_018891.1    | 3918      | 4.155   | 4.9448  | 4.8635  | 4.654           |
| ILMN_1653824 | LAMC2      | NM_005562.1    | 3918      | 4.3512  | 4.255   | 5.3512  | 4.652           |
| ILMN_1759513 | RND3       | NM_005168.3    | 390       | 3.7724  | 5.1185  | 5.0266  | 4.639           |
| ILMN_1730777 | KRT19      | NM_002276.3    | 3880      | 5.0448  | 4.8048  | 4.0082  | 4.619           |
| ILMN_2406035 | LAMA3      | NM_198129.1    | 3909      | 5.4519  | 4.152   | 4.2232  | 4.609           |
| ILMN_1739001 | TACSTD2    | NM_002353.1    | 4070      | 4.6573  | 5.0676  | 3.9347  | 4.553           |
| ILMN_1770653 | MAL2       | NM_052886.2    | 114569    | 5.2651  | 5.1859  | 3.1941  | 4.548           |
| ILMN_1785404 | FGFBP1     | NM_005130.3    | 9982      | 4.431   | 4.6308  | 4.3942  | 4.485           |
| ILMN_1785330 | SH3BP4     | NM_014521.2    | 23677     | 4.0863  | 5.3096  | 4.0517  | 4.483           |
| ILMN_1772131 | IL1R2      | NM_173343.1    | 7850      | 3.9738  | 4.97    | 4.4931  | 4.479           |
| ILMN_1665792 | ITGA2      | NM_002203.3    | 3673      | 4.3543  | 3.1562  | 5.7376  | 4.416           |
| ILMN_2189027 | LIPG       | NM_006033.2    | 9388      | 4.5875  | 4.1695  | 4.4806  | 4.413           |
| ILMN_1763638 | BCAR3      | NM_003567.2    | 8412      | 3.4223  | 4.3568  | 5.3693  | 4.383           |
| ILMN_2114720 | SLPI       | NM_003064.2    | 6590      | 3.6358  | 4.4506  | 4.7725  | 4.286           |
| ILMN_1668411 | FHL2       | NM_201557.2    | 2274      | 5.4054  | 3.0559  | 4.3591  | 4.273           |
| ILMN_1685403 | MMP7       | NM_002423.3    | 4316      | 6.2454  | 3.2652  | 3.3012  | 4.271           |
| ILMN_1769201 | ELF3       | NM_004433.3    | 1999      | 4.4918  | 4.3259  | 3.9774  | 4.265           |
| ILMN_1724686 | CLDN1      | NM_021101.3    | 9076      | 5.3911  | 4.0634  | 3.3387  | 4.264           |
| ILMN_2163723 | KRT7       | NM_005556.3    | 3855      | 4.6852  | 3.6235  | 4.4066  | 4.238           |
| ILMN_2192072 | MMP7       | NM_002423.3    | 4316      | 6.1997  | 3.2734  | 3.2137  | 4.229           |
| ILMN_2235851 | LINC1      | NM_001080535.1 | 93082     | 3.5476  | 5.3331  | 3.7994  | 4.227           |
| ILMN_1701424 | LAMC2      | NM_005562.1    | 3918      | 4.7785  | 3.6117  | 4.2388  | 4.210           |
| ILMN_1811364 | SGPP2      | XM_938742.1    | 130367    | 2.3088  | 5.1549  | 5.052   | 4.172           |
| ILMN_2186061 | PFKFB3     | NM_004566.2    | 5209      | 1.3972  | 3.9299  | 6.9621  | 4.096           |
| ILMN_1692223 | LCN2       | NM_005564.3    | 3934      | 3.8048  | 3.6676  | 4.7348  | 4.069           |
| ILMN_1694778 | LOC646723  | XR_017241.1    | 646723    | 5.2624  | 3.3574  | 3.4785  | 4.033           |
| ILMN_2355831 | FHL2       | NM_201555.1    | 2274      | 4.7819  | 2.7785  | 4.4828  | 4.014           |
| ILMN_1724941 | CDCP1      | NM_022842.3    | 64866     | 2.9539  | 4.7893  | 4.2072  | 3.983           |
| ILMN_1806607 | SFN        | NM_006142.3    | 2810      | 4.0688  | 3.6834  | 4.1636  | 3.972           |
| ILMN_1682599 | GPRC5A     | NM_003979.3    | 9052      | 3.098   | 4.6448  | 4.1636  | 3.969           |
| ILMN_1699651 | IL6        | NM_000600.1    | 3569      | 3.1707  | 3.6383  | 4.8831  | 3.897           |
| ILMN_2324421 | TXNRD1     | NM_182743.1    | 7296      | 2.7729  | 3.9602  | 4.8339  | 3.856           |
| ILMN_1685574 | TSC22D2    | NM_014779.2    | 9819      | 2.3809  | 4.6722  | 4.4876  | 3.847           |
| ILMN_1752502 | HKDC1      | NM_025130.2    | 80201     | 3.8121  | 4.5928  | 3.0914  | 3.832           |
| ILMN_1757387 | UCHL1      | NM_004181.3    | 7345      | 3.5642  | 3.9198  | 4.005   | 3.830           |
| ILMN_1703593 | BAIAP2L1   | NM_018842.3    | 55971     | 3.4455  | 3.662   | 4.3475  | 3.818           |
| ILMN_1673566 | ADAMTS1    | NM_006988.3    | 9510      | 3.8969  | 2.7198  | 4.7793  | 3.799           |
| ILMN_2128639 | C10orf47   | NM_153256.2    | 254427    | 3.621   | 4.3918  | 3.3792  | 3.797           |
| ILMN_1691499 | TJP1       | NM_003257.3    | 7082      | 3.3571  | 4.2273  | 3.7928  | 3.792           |
| ILMN_1715684 | LAMB3      | NM_000228.2    | 3914      | 4.3929  | 2.8995  | 4.0823  | 3.792           |
| ILMN_1735461 | DDX21      | NM_004728.2    | 9188      | 2.6482  | 5.1136  | 3.5705  | 3.777           |
| ILMN_1753370 | ABTB2      | NM_145804.1    | 25841     | 2.453   | 4.8106  | 4.0513  | 3.772           |
| ILMN_1661755 | FAM129B    | NM_022833.2    | 64855     | 2.9493  | 2.8958  | 5.447   | 3.764           |
| ILMN_2311537 | HMGA1      | NM_145899.1    | 3159      | 3.062   | 3.715   | 4.4847  | 3.754           |
| ILMN_2139970 | ALDH1A3    | NM_000693.1    | 220       | 2.7334  | 4.0767  | 4.4358  | 3.749           |
| ILMN_1769282 | FRMD6      | NM_152330.2    | 122786    | 3.4188  | 4.4773  | 3.3376  | 3.745           |
| ILMN_2364521 | AXL        | NM_021913.2    | 558       | 3.3513  | 3.1196  | 4.5682  | 3.680           |
| ILMN_1734276 | TMEPAI     | NM_199169.1    | 56937     | 3.166   | 4.3546  | 3.5074  | 3.676           |
| ILMN_1771841 | FOSL1      | NM_005438.2    | 8061      | 2.9636  | 3.0251  | 5.0051  | 3.665           |
| ILMN_1678842 | THBS2      | NM_003247.2    | 7058      | 3.7116  | 2.5895  | 4.672   | 3.658           |
| ILMN_1796925 | CXADR      | NM_001338.3    | 1525      | 4.0041  | 3.0926  | 3.8544  | 3.650           |
| ILMN_1725852 | S100A2     | NM_005978.3    | 6273      | 3.5404  | 4.618   | 2.7722  | 3.644           |
| ILMN_1690170 | CRABP2     | NM_001878.2    | 1382      | 2.2423  | 4.9553  | 3.7319  | 3.643           |
| ILMN_2408576 | FAM129B    | NM_001035534.1 | 64855     | 2.5596  | 4.6119  | 3.7146  | 3.629           |
| ILMN_1793934 | PISD       | NM_014338.3    | 23761     | 1.3429  | 5.0424  | 4.4966  | 3.627           |
| ILMN_1683859 | SLC7A1     | NM_003045.3    | 6541      | 1.775   | 4.9136  | 4.1371  | 3.609           |
| ILMN_1779706 | TP53BP2    | NM_001031685.2 | 7159      | 2.2561  | 3.515   | 5.0229  | 3.598           |
| ILMN_1684836 | AKAP12     | NM_144497.1    | 9590      | 2.7427  | 3.2781  | 4.7508  | 3.591           |
| ILMN_1708340 | DAPK1      | NM_004938.2    | 1612      | 3.7926  | 3.162   | 3.8115  | 3.589           |
| ILMN_2094952 | NUAK2      | NM_030952.1    | 81788     | 2.1191  | 3.9048  | 4.6818  | 3.569           |
| ILMN_2408543 | PLAUR      | NM_002659.2    | 5329      | 1.8524  | 4.5869  | 4.2133  | 3.551           |
| ILMN_1719759 | TNC        | NM_002160.2    | 3371      | 3.5349  | 3.0546  | 4.0069  | 3.532           |
| ILMN_2409167 | ANXA2      | NM_001002858.1 | 302       | 3.1959  | 3.1118  | 4.286   | 3.531           |
| ILMN_1711899 | ANXA2      | NM_001002857.1 | 302       | 1.8513  | 4.5643  | 4.177   | 3.531           |
| ILMN_1808789 | MYO5C      | NM_018728.2    | 55930     | 3.3681  | 3.7967  | 3.3586  | 3.508           |
| ILMN_2309156 | TMEPAI     | NM_199169.1    | 56937     | 2.9775  | 3.9236  | 3.6154  | 3.506           |
| ILMN_2136446 | CTNNA1     | NM_003798.1    | 8727      | 2.1232  | 4.4672  | 3.8854  | 3.492           |
| ILMN_2220184 | GFPT1      | NM_002056.1    | 2673      | 2.1433  | 4.4903  | 3.7676  | 3.467           |
| ILMN_2412336 | AKR1C2     | NM_001354.4    | 1646      | 3.3846  | 4.388   | 2.6281  | 3.467           |
| ILMN_1698666 | CST6       | NM_001323.2    | 1474      | 3.9296  | 3.0198  | 3.4289  | 3.459           |
| ILMN_1669046 | FOXQ1      | NM_033260.3    | 94234     | 4.3715  | 3.5336  | 2.4626  | 3.456           |
| ILMN_1725946 | IRF6       | NM_006147.2    | 3664      | 2.2106  | 4.2559  | 3.8884  | 3.452           |
| ILMN_1735220 | CAV2       | NM_001233.3    | 858       | 3.2372  | 3.6625  | 3.4484  | 3.449           |
| ILMN_1811470 | PLEK2      | NM_016445.1    | 26499     | 3.1152  | 3.707   | 3.4808  | 3.434           |
| ILMN_1806907 | PAWR       | NM_002583.2    | 5074      | 2.7041  | 3.3741  | 4.2241  | 3.434           |
| ILMN_1723486 | HK2        | NM_000189.4    | 3099      | 1.4004  | 4.3647  | 4.4327  | 3.399           |
| ILMN_1805466 | SOX9       | NM_000346.2    | 6662      | 3.663   | 2.6844  | 3.817   | 3.388           |
| ILMN_2347622 | TRIM55     | NM_184086.1    | 84675     | 3.0341  | 2.5014  | 4.6175  | 3.384           |
| ILMN_1699354 | EPHA2      | NM_004431.2    | 1969      | 2.5682  | 3.979   | 3.5802  | 3.376           |
| ILMN_1745076 | CLINT1     | NM_014666.2    | 9685      | 1.4134  | 5.3742  | 3.3084  | 3.365           |
| ILMN_1814799 | S100A13    | NM_001024212.1 | 6284      | 3.9864  | 3.9704  | 2.13    | 3.362           |

|              |           |                |        |        |        |        |       |
|--------------|-----------|----------------|--------|--------|--------|--------|-------|
| ILMN_1727080 | MYO6      | NM_004999.3    | 4646   | 2.6221 | 4.2678 | 3.1931 | 3.361 |
| ILMN_1746465 | FJX1      | NM_014344.2    | 24147  | 2.8091 | 3.7403 | 3.5141 | 3.355 |
| ILMN_2089329 | SPRY2     | NM_005842.2    | 10253  | 2.6522 | 3.5943 | 3.8073 | 3.351 |
| ILMN_1689431 | APCDD1L   | NM_153360.1    | 164284 | 1.9484 | 4.0702 | 4.0192 | 3.346 |
| ILMN_1688892 | LAMA3     | NM_198129.1    | 3909   | 5.0266 | 1.7428 | 3.2444 | 3.338 |
| ILMN_2190414 | ZNF83     | NM_018300.2    | 55769  | 2.1738 | 4.3339 | 3.4883 | 3.332 |
| ILMN_2184612 | C3orf52   | NM_024616.1    | 79669  | 2.7238 | 3.3603 | 3.8985 | 3.328 |
| ILMN_2308849 | MYADM     | NM_001020820.1 | 91663  | 1.0683 | 2.7431 | 6.1647 | 3.325 |
| ILMN_1785170 | ARMCX2    | NM_177949.1    | 9823   | 2.2203 | 4.1148 | 3.6319 | 3.322 |
| ILMN_2331231 | TNFRSF6B  | NM_032945.2    | 8771   | 2.934  | 2.7905 | 4.2228 | 3.316 |
| ILMN_1779031 | ZPLD1     | NM_175056.1    | 131368 | 4.2163 | 2.5251 | 3.1801 | 3.307 |
| ILMN_1779234 | CXCL6     | NM_002993.2    | 6372   | 2.2898 | 3.563  | 4.0304 | 3.294 |
| ILMN_1706483 | C1orf116  | NM_023938.5    | 79098  | 5.0259 | 2.2474 | 2.6074 | 3.294 |
| ILMN_2073446 | C1orf116  | NM_023938.4    | 79098  | 4.5026 | 1.4859 | 3.8903 | 3.293 |
| ILMN_1801205 | GPNMB     | NM_001005340.1 | 10457  | 3.3638 | 3.0717 | 3.3766 | 3.271 |
| ILMN_1730670 | FSTL3     | NM_005860.2    | 10272  | 3.0282 | 2.7907 | 3.9846 | 3.268 |
| ILMN_1750338 | C10orf47  | NM_153256.2    | 254427 | 3.485  | 2.4336 | 3.8752 | 3.265 |
| ILMN_1685176 | SGMS2     | NM_152621.4    | 166929 | 2.7776 | 3.7737 | 3.2322 | 3.261 |
| ILMN_1717381 | HOXD1     | NM_024501.1    | 3231   | 3.1204 | 3.5055 | 3.1545 | 3.260 |
| ILMN_1655429 | TNFAIP1   | NM_021137.3    | 7126   | 1.6341 | 4.0922 | 4.043  | 3.256 |
| ILMN_1739496 | PRRX1     | NM_006902.3    | 5396   | 3.7596 | 2.2659 | 3.7292 | 3.252 |
| ILMN_2324056 | GNL3      | NM_206826.1    | 26354  | 1.3503 | 4.3058 | 4.063  | 3.240 |
| ILMN_2137789 | KLF4      | NM_004235.3    | 9314   | 2.9181 | 3.9037 | 2.8875 | 3.236 |
| ILMN_1798458 | KIAA1026  | NM_001018000.2 | 23254  | 2.5707 | 3.6061 | 3.5199 | 3.232 |
| ILMN_1715748 | FLNC      | NM_001458.3    | 2318   | 2.2393 | 2.2004 | 5.2233 | 3.221 |
| ILMN_1745954 | CORO1C    | NM_014325.2    | 23603  | 2.6476 | 3.4839 | 3.5253 | 3.219 |
| ILMN_2348788 | CD44      | NM_001001392.1 | 960    | 1.7764 | 3.9484 | 3.9145 | 3.213 |
| ILMN_1787897 | CXCL1     | NM_001511.1    | 2919   | 2.2538 | 3.1253 | 4.2491 | 3.209 |
| ILMN_1680874 | TUBB2B    | NM_178012.3    | 347733 | 4.3543 | 2.6366 | 2.6342 | 3.208 |
| ILMN_1707156 | LRRFIP2   | NM_017724.1    | 9209   | 2.0084 | 4.5027 | 3.0916 | 3.201 |
| ILMN_1678919 | YOD1      | NM_018566.3    | 55432  | 2.6137 | 3.8261 | 3.1559 | 3.199 |
| ILMN_1671404 | SVIL      | NM_003174.3    | 6840   | 2.2209 | 2.4745 | 4.8896 | 3.195 |
| ILMN_1664855 | PPP1R14C  | NM_030949.2    | 81706  | 4.0807 | 3.2043 | 2.2771 | 3.187 |
| ILMN_1770940 | CDH1      | NM_004360.2    | 999    | 4.3207 | 2.6085 | 2.5684 | 3.166 |
| ILMN_1790689 | CRISPLD2  | NM_031476.2    | 83716  | 2.0589 | 3.8469 | 3.5314 | 3.146 |
| ILMN_1754600 | FNBP1L    | NM_001024948.1 | 54874  | 2.9972 | 3.4183 | 3.0157 | 3.144 |
| ILMN_1784294 | CPA4      | NM_016352.2    | 51200  | 4.7391 | 3.2419 | 1.4218 | 3.134 |
| ILMN_1715273 | PICALM    | NM_007166.2    | 8301   | 2.3082 | 4.6673 | 2.42   | 3.132 |
| ILMN_1807439 | ALDH1A3   | NM_000693.2    | 220    | 2.4218 | 3.3731 | 3.574  | 3.123 |
| ILMN_1658619 | WWC1      | NM_015238.1    | 23286  | 4.4225 | 3.5156 | 1.4265 | 3.122 |
| ILMN_1683598 | ACSL4     | NM_004458.1    | 2182   | 2.3102 | 3.2017 | 3.8495 | 3.120 |
| ILMN_1664978 | TJP2      | NM_201629.1    | 9414   | 2.741  | 4.3459 | 2.2657 | 3.118 |
| ILMN_2041101 | ANXA2P1   | NM_001562.1    | 303    | 3.1982 | 2.8743 | 3.2692 | 3.114 |
| ILMN_2156172 | HK2       | NM_000189.4    | 3099   | 1.3456 | 4.3174 | 3.6702 | 3.111 |
| ILMN_2341611 | CDCP1     | NM_178181.1    | 64866  | 2.3337 | 3.1939 | 3.7996 | 3.109 |
| ILMN_2317923 | TMEM132A  | NM_178031.2    | 54972  | 2.1782 | 3.1889 | 3.9564 | 3.108 |
| ILMN_1801616 | EMP1      | NM_001423.1    | 2012   | 2.5221 | 2.7893 | 3.9767 | 3.096 |
| ILMN_1693620 | PGM3      | NM_015599.1    | 5238   | 1.6435 | 4.1397 | 3.5005 | 3.095 |
| ILMN_1747759 | WSB1      | NM_134264.2    | 26118  | 1.0455 | 4.2129 | 4.0123 | 3.090 |
| ILMN_1702712 | TRIM55    | NM_184085.1    | 84675  | 2.4334 | 3.6117 | 3.195  | 3.080 |
| ILMN_1808587 | ATBF1     | NM_006885.3    | 463    | 1.9902 | 3.5108 | 3.7378 | 3.080 |
| ILMN_1677432 | SRGAP1    | NM_020762.1    | 57522  | 1.8892 | 3.4873 | 3.8612 | 3.079 |
| ILMN_1753143 | RHPN2     | NM_033103.3    | 85415  | 4.435  | 2.5663 | 2.2148 | 3.072 |
| ILMN_1750722 | RPS7      | NM_001011.3    | 6201   | 2.655  | 4.7715 | 1.7746 | 3.067 |
| ILMN_1671971 | LOC644743 | XR_016703.1    | 644743 | 2.669  | 3.6585 | 2.8711 | 3.066 |
| ILMN_1752935 | TMEM30B   | NM_001017970.2 | 161291 | 2.5788 | 3.2596 | 3.3578 | 3.065 |
| ILMN_1735499 | DCBLD2    | NM_080927.3    | 131566 | 3.8219 | 2.8315 | 2.4759 | 3.043 |
| ILMN_1808011 | FAM46B    | NM_052943.2    | 115572 | 2.9559 | 3.3231 | 2.8477 | 3.042 |
| ILMN_2188264 | CYR61     | NM_001554.3    | 3491   | 3.8003 | 2.7321 | 2.5873 | 3.040 |
| ILMN_1740571 | LOC647859 | XM_001130815.1 | 647859 | 3.1095 | 2.5181 | 3.444  | 3.024 |
| ILMN_1789702 | GBE1      | NM_000158.2    | 2632   | 2.1969 | 4.2498 | 2.5992 | 3.015 |
| ILMN_2374340 | PLAUR     | NM_001005376.1 | 5329   | 1.9864 | 2.6483 | 4.4028 | 3.013 |
| ILMN_1682738 | SMAD3     | NM_005902.3    | 4088   | 1.1109 | 3.3629 | 4.4657 | 2.980 |
| ILMN_1736670 | PPP1R3C   | NM_005398.4    | 5507   | 1.8328 | 3.8236 | 3.2739 | 2.977 |
| ILMN_1706094 | HECTD1    | NM_015382.1    | 25831  | 2.2268 | 3.2727 | 3.418  | 2.973 |
| ILMN_1673522 | MOCOS     | NM_017947.1    | 55034  | 2.9063 | 3.2633 | 2.7214 | 2.964 |
| ILMN_1659027 | SLC2A1    | NM_006516.1    | 6513   | 1.9353 | 3.1395 | 3.808  | 2.961 |
| ILMN_1689004 | TNFRSF12A | NM_016639.1    | 51330  | 3.9642 | 2.4662 | 2.4523 | 2.961 |
| ILMN_2161577 | CXCL6     | NM_002993.2    | 6372   | 1.555  | 2.9193 | 4.3923 | 2.956 |
| ILMN_1779517 | RASEF     | NM_152573.2    | 158158 | 2.8103 | 2.982  | 3.0666 | 2.953 |
| ILMN_2149226 | CAV1      | NM_001753.3    | 857    | 2.1281 | 2.016  | 4.7044 | 2.950 |
| ILMN_1705750 | TGM2      | NM_004613.2    | 7052   | 3.3601 | 2.9001 | 2.5737 | 2.945 |
| ILMN_2070072 | RPS7      | NM_001011.3    | 6201   | 2.6564 | 4.2665 | 1.9052 | 2.943 |
| ILMN_2179083 | LOXL4     | NM_032211.6    | 84171  | 2.9016 | 3.5639 | 2.3573 | 2.941 |
| ILMN_1760412 | TMEM46    | NM_001007538.1 | 387914 | 3.0256 | 2.5246 | 3.2719 | 2.941 |
| ILMN_2405521 | MTHFD2    | NM_001040409.1 | 10797  | 1.2884 | 4.5914 | 2.9364 | 2.939 |
| ILMN_2174127 | DCBLD2    | NM_080927.3    | 131566 | 3.5334 | 2.2577 | 3.0105 | 2.934 |
| ILMN_1704196 | DSG2      | NM_001943.2    | 1829   | 2.0589 | 3.0894 | 3.6341 | 2.927 |
| ILMN_2188862 | GDF15     | NM_004864.1    | 9518   | 3.6734 | 2.6838 | 2.4094 | 2.922 |
| ILMN_1721876 | TIMP2     | NM_003255.4    | 7077   | 1.9132 | 2.6985 | 4.1337 | 2.915 |
| ILMN_1704369 | LIMA1     | NM_016357.3    | 51474  | 2.2243 | 3.0278 | 3.4927 | 2.915 |
| ILMN_1704294 | CDH3      | NM_001793.3    | 1001   | 3.7814 | 2.7655 | 2.178  | 2.908 |
| ILMN_1663618 | STAT3     | NM_213662.1    | 6774   | 1.2104 | 4.0493 | 3.4568 | 2.906 |
| ILMN_2410924 | PLOD2     | NM_000935.2    | 5352   | 1.8744 | 3.7577 | 3.0611 | 2.898 |
| ILMN_1733937 | MMD       | NM_012329.2    | 23531  | 1.8858 | 3.3158 | 3.4748 | 2.892 |
| ILMN_1738725 | LIF       | NM_002309.2    | 3976   | 2.2304 | 2.716  | 3.7206 | 2.889 |
| ILMN_2228035 | HS3ST1    | NM_005114.2    | 9957   | 3.3279 | 2.6629 | 2.671  | 2.887 |
| ILMN_2326712 | BACE2     | NM_138991.1    | 25825  | 2.5581 | 2.9332 | 3.1663 | 2.886 |
| ILMN_1724495 | SESTD1    | NM_178123.3    | 91404  | 1.5935 | 3.3792 | 3.6801 | 2.884 |
| ILMN_1715532 | AKAP12    | NM_005100.2    | 9590   | 1.0785 | 4.2605 | 3.3    | 2.880 |

|              |           |                |        |        |        |        |       |
|--------------|-----------|----------------|--------|--------|--------|--------|-------|
| ILMN_1671486 | HOMER2    | NM_199331.2    | 9455   | 2.4488 | 3.0749 | 3.1084 | 2.877 |
| ILMN_1677511 | PTGS2     | NM_000963.1    | 5743   | 3.0916 | 2.5474 | 2.9696 | 2.870 |
| ILMN_1801383 | SMG1      | NM_015092.3    | 23049  | 1.2271 | 3.9103 | 3.4673 | 2.868 |
| ILMN_2121408 | HBEGF     | NM_001945.1    | 1839   | 1.7034 | 2.3689 | 4.5068 | 2.860 |
| ILMN_2105919 | FGF2      | NM_002006.3    | 2247   | 3.3185 | 2.605  | 2.6367 | 2.853 |
| ILMN_1677092 | GEM       | NM_181702.1    | 2669   | 3.1893 | 3.5001 | 1.8581 | 2.849 |
| ILMN_1772821 | KIAA1671  | XM_371461.4    | 85379  | 1.6535 | 3.2599 | 3.6295 | 2.848 |
| ILMN_1697733 | CST6      | XM_001129442.1 | 1474   | 3.2776 | 2.7214 | 2.5407 | 2.847 |
| ILMN_1777296 | ACTB      | NM_001101.2    | 60     | 2.1857 | 3.307  | 3.0447 | 2.846 |
| ILMN_2386355 | CSNK2A1   | NM_001895.3    | 1457   | 1.3792 | 4.0908 | 3.0589 | 2.843 |
| ILMN_2367883 | GEM       | NM_181702.1    | 2669   | 3.0223 | 3.8931 | 1.6106 | 2.842 |
| ILMN_2083946 | TGFA      | NM_003236.1    | 7039   | 2.7884 | 2.795  | 2.9422 | 2.842 |
| ILMN_1720048 | CCL2      | NM_002982.3    | 6347   | 2.6982 | 2.2081 | 3.6149 | 2.840 |
| ILMN_1775327 | PKM2      | NM_182470.1    | 5315   | 1.5125 | 3.4406 | 3.5543 | 2.836 |
| ILMN_1712419 | DCDC2     | NM_016356.3    | 51473  | 2.9115 | 3.5126 | 2.0715 | 2.832 |
| ILMN_1712545 | S100A3    | NM_002960.1    | 6274   | 2.1897 | 1.7963 | 4.506  | 2.831 |
| ILMN_2308950 | AKAP12    | NM_005100.2    | 9590   | 1.3318 | 3.3075 | 3.8244 | 2.821 |
| ILMN_1669390 | PPP1R13L  | NM_006663.2    | 10848  | 1.3152 | 4.175  | 2.9681 | 2.819 |
| ILMN_1736796 | RB1CC1    | NM_001083617.1 | 9821   | 1.0712 | 3.8016 | 3.5777 | 2.817 |
| ILMN_2402600 | GLIS3     | NM_152629.2    | 169792 | 2.5122 | 2.9738 | 2.958  | 2.815 |
| ILMN_1708534 | PAX8      | NM_003466.3    | 7849   | 3.9776 | 2.7029 | 1.759  | 2.813 |
| ILMN_1655614 | DSP       | NM_001008844.1 | 1832   | 3.4566 | 3.089  | 1.883  | 2.810 |
| ILMN_1781374 | TUFT1     | NM_020127.1    | 7286   | 1.8599 | 4.3856 | 2.1741 | 2.807 |
| ILMN_1722718 | BMP2      | NM_001200.2    | 650    | 2.2121 | 3.4675 | 2.7386 | 2.806 |
| ILMN_1653871 | PBEF1     | NM_005746.2    | 10135  | 1.866  | 3.3858 | 3.1584 | 2.803 |
| ILMN_1757237 | DDEF2     | NM_003887.1    | 8853   | 2.9548 | 3.7206 | 1.7265 | 2.801 |
| ILMN_1775330 | C15orf52  | NM_207380.1    | 388115 | 1.7601 | 3.1061 | 3.5196 | 2.795 |
| ILMN_1755937 | ANXA2     | NM_001002857.1 | 302    | 2.7495 | 2.0675 | 3.557  | 2.791 |
| ILMN_1717294 | PTPN3     | NM_002829.2    | 5774   | 2.8423 | 3.0413 | 2.4771 | 2.787 |
| ILMN_1815745 | SOX4      | NM_003107.2    | 6659   | 2.6402 | 2.229  | 3.4715 | 2.780 |
| ILMN_1678841 | UBD       | NM_006398.2    | 10537  | 3.1288 | 2.9869 | 2.2169 | 2.778 |
| ILMN_1791328 | STK39     | NM_013233.2    | 27347  | 1.0656 | 3.779  | 3.4582 | 2.768 |
| ILMN_1657153 | ACTR3     | NM_005721.3    | 10096  | 1.6246 | 3.3411 | 3.3174 | 2.761 |
| ILMN_1657708 | MGLL      | NM_007283.5    | 11343  | 3.6367 | 2.7187 | 1.9258 | 2.760 |
| ILMN_1724040 | ANKRD57   | NM_023016.3    | 65124  | 3.7259 | 2.326  | 2.2219 | 2.758 |
| ILMN_1757644 | UBE2H     | NM_003344.2    | 7328   | 1.4964 | 3.2997 | 3.4318 | 2.743 |
| ILMN_2403006 | TJP1      | NM_175610.2    | 7082   | 3.052  | 2.9685 | 2.1935 | 2.738 |
| ILMN_1800540 | CD55      | NM_000574.2    | 1604   | 1.8739 | 1.9067 | 4.407  | 2.729 |
| ILMN_1786189 | MKI67IP   | NM_032390.3    | 84365  | 1.2344 | 4.1482 | 2.7994 | 2.727 |
| ILMN_2363621 | RBBP8     | NM_203291.1    | 5932   | 2.8302 | 3.4757 | 1.8703 | 2.725 |
| ILMN_1754839 | DHX15     | NM_001358.2    | 1665   | 1.322  | 3.3016 | 3.5519 | 2.725 |
| ILMN_1789793 | NUAK2     | NM_030952.1    | 81788  | 1.9658 | 3.9164 | 2.289  | 2.724 |
| ILMN_1844692 | FOXO3     | NM_201559.2    | 2309   | 1.1041 | 4.1712 | 2.8665 | 2.714 |
| ILMN_2143685 | CLDN7     | NM_001307.3    | 1366   | 4.286  | 1.9184 | 1.9238 | 2.709 |
| ILMN_1786720 | PROM1     | NM_006017.1    | 8842   | 3.7702 | 1.3565 | 2.9775 | 2.701 |
| ILMN_1807596 | UBAP1     | NM_016525.3    | 51271  | 1.5342 | 3.3603 | 3.2024 | 2.699 |
| ILMN_2399300 | NAV2      | NM_145117.3    | 89797  | 2.2924 | 1.6888 | 4.1005 | 2.694 |
| ILMN_1805175 | TGFA      | NM_001099691.1 | 7039   | 2.3795 | 2.6189 | 3.0771 | 2.692 |
| ILMN_1746801 | CGN       | NM_020770.1    | 57530  | 2.4434 | 3.9801 | 1.6469 | 2.690 |
| ILMN_2387385 | IGFBP1    | NM_001013029.1 | 3484   | 2.2647 | 2.2108 | 3.5868 | 2.687 |
| ILMN_2124187 | TSC2D2    | NM_014779.2    | 9819   | 1.2618 | 4.1399 | 2.6604 | 2.687 |
| ILMN_1708203 | OTUD4     | NM_199324.1    | 54726  | 1.3569 | 3.7473 | 2.944  | 2.683 |
| ILMN_1757467 | H1FO      | NM_005318.2    | 3005   | 2.4577 | 3.4924 | 2.0615 | 2.671 |
| ILMN_2404085 | CLIP1     | NM_002956.2    | 6249   | 1.6869 | 3.3584 | 2.9635 | 2.670 |
| ILMN_1664861 | ID1       | NM_181353.1    | 3397   | 1.782  | 2.5119 | 3.7119 | 2.669 |
| ILMN_1693338 | CYP1B1    | NM_000104.2    | 1545   | 1.9627 | 2.9595 | 3.0785 | 2.667 |
| ILMN_1778561 | WEE1      | NM_003390.2    | 7465   | 2.126  | 2.3067 | 3.5263 | 2.653 |
| ILMN_1658384 | CRTAC1    | NM_018058.4    | 55118  | 2.6898 | 2.91   | 2.3514 | 2.650 |
| ILMN_1729455 | EML1      | NM_004434.2    | 2009   | 2.9902 | 2.8289 | 2.129  | 2.649 |
| ILMN_1680018 | RIPK4     | NM_020639.2    | 54101  | 2.7145 | 3.8688 | 1.3431 | 2.642 |
| ILMN_1728677 | CREB5     | NM_001011666.1 | 9586   | 1.6811 | 3.2236 | 3.0213 | 2.642 |
| ILMN_2370976 | FER1L3    | NM_013451.2    | 26509  | 3.0352 | 3.4504 | 1.4324 | 2.639 |
| ILMN_1691508 | PLAUR     | NM_001005376.1 | 5329   | 1.3058 | 3.1928 | 3.4182 | 2.639 |
| ILMN_1695946 | LOC388610 | NM_001013642.2 | 388610 | 2.9397 | 1.2507 | 3.7081 | 2.633 |
| ILMN_1804415 | LOC57228  | NM_001033873.1 | 57228  | 1.7555 | 3.8442 | 2.2929 | 2.631 |
| ILMN_2119297 | SAMD4A    | NM_015589.3    | 23034  | 1.331  | 3.3551 | 3.1996 | 2.629 |
| ILMN_1805543 | ADAMTS9   | NM_182920.1    | 56999  | 2.6201 | 1.6746 | 3.5909 | 2.629 |
| ILMN_1715789 | DOCK1     | NM_001380.3    | 1793   | 2.0658 | 2.9946 | 2.7914 | 2.617 |
| ILMN_2371911 | MUC1      | NM_001044390.1 | 4582   | 3.1678 | 1.8259 | 2.8567 | 2.617 |
| ILMN_1744381 | SERPINE1  | NM_000602.1    | 5054   | 1.2728 | 1.7893 | 4.7834 | 2.615 |
| ILMN_1767658 | RRS1      | NM_015169.3    | 23212  | 1.7335 | 2.7267 | 3.3737 | 2.611 |
| ILMN_1812616 | MYO1C     | NM_033375.4    | 4641   | 2.0115 | 4.2468 | 1.5722 | 2.610 |
| ILMN_1742167 | TUBA6     | NM_032704.2    | 84790  | 1.9662 | 2.6989 | 3.1619 | 2.609 |
| ILMN_2347145 | DCN       | NM_133505.2    | 1634   | 3.153  | 1.5793 | 3.0881 | 2.607 |
| ILMN_1694305 | SMS       | NM_004595.2    | 6611   | 2.742  | 2.6671 | 2.4067 | 2.605 |
| ILMN_1715175 | MET       | NM_000245.2    | 4233   | 2.4379 | 2.91   | 2.4636 | 2.604 |
| ILMN_2330787 | FRMD6     | NM_152330.2    | 122786 | 3.098  | 2.058  | 2.6539 | 2.603 |
| ILMN_1709479 | YAP1      | NM_006106.2    | 10413  | 3.0791 | 3.3916 | 1.3358 | 2.602 |
| ILMN_1714741 | LOC346887 | XM_943533.1    | 346887 | 2.4805 | 2.9182 | 2.4051 | 2.601 |
| ILMN_1698732 | PALLD     | NM_016081.3    | 23022  | 2.6393 | 3.2926 | 1.8636 | 2.599 |
| ILMN_1806502 | ZNF165    | NM_003447.2    | 7718   | 1.7002 | 2.7843 | 3.2955 | 2.593 |
| ILMN_2374865 | ATF3      | NM_001040619.1 | 467    | 1.1817 | 2.5339 | 4.0519 | 2.589 |
| ILMN_1664922 | FLNB      | NM_001457.1    | 2317   | 2.1861 | 2.2931 | 3.2812 | 2.587 |
| ILMN_1689037 | LIPG      | NM_006033.2    | 9388   | 4.3567 | 1.6536 | 1.7471 | 2.586 |
| ILMN_1755303 | ZNF217    | NM_006526.2    | 7764   | 1.5481 | 3.1569 | 3.046  | 2.584 |
| ILMN_1742577 | GTPBP4    | NM_012341.2    | 23560  | 1.2518 | 2.8294 | 3.6618 | 2.581 |
| ILMN_1667561 | IFRD1     | NM_001550.2    | 3475   | 1.6675 | 3.4698 | 2.6021 | 2.580 |
| ILMN_1666845 | KRT17     | NM_000422.1    | 3872   | 2.6127 | 2.6873 | 2.6129 | 2.571 |
| ILMN_2285404 | ZD52F10   | NM_033317.2    | 93099  | 2.6077 | 2.7176 | 2.3631 | 2.563 |
| ILMN_2041293 | SQLE      | NM_003129.3    | 6713   | 1.0387 | 4.152  | 2.4783 | 2.556 |

|              |           |                |        |        |        |        |       |
|--------------|-----------|----------------|--------|--------|--------|--------|-------|
| ILMN_2360710 | TPM1      | NM_001018004.1 | 7168   | 4.1387 | 1.7313 | 1.7888 | 2.553 |
| ILMN_1705107 | SDCBP2    | NM_015685.4    | 27111  | 2.1403 | 2.5305 | 2.9629 | 2.545 |
| ILMN_1696048 | FLJ14834  | NM_032849.2    | 84935  | 2.5999 | 1.7175 | 3.3058 | 2.541 |
| ILMN_1717056 | TXNRD1    | NM_001093771.1 | 7296   | 2.1631 | 2.1162 | 3.3395 | 2.540 |
| ILMN_1710906 | FLJ31951  | NM_144726.1    | 153830 | 1.2949 | 3.2034 | 3.1112 | 2.537 |
| ILMN_1711828 | ANKRD10   | NM_017664.2    | 55608  | 1.2977 | 3.3566 | 2.9552 | 2.537 |
| ILMN_2071641 | KCNK1     | NM_002245.2    | 3775   | 2.7075 | 1.8358 | 3.0562 | 2.533 |
| ILMN_1747744 | LHFPL2    | NM_005779.1    | 10184  | 2.1226 | 3.0771 | 2.3961 | 2.532 |
| ILMN_2393712 | CTTN      | NM_138565.1    | 2017   | 2.6954 | 3.4836 | 1.4082 | 2.529 |
| ILMN_1675331 | PEG3      | NM_006210.1    | 5178   | 2.0177 | 3.1062 | 2.449  | 2.524 |
| ILMN_2060413 | CD24      | NM_013230.2    | 934    | 4.6769 | 1.4867 | 1.4077 | 2.524 |
| ILMN_1792681 | MGC2574   | NM_024098.1    | 79080  | 1.1495 | 3.7291 | 2.6836 | 2.521 |
| ILMN_2413527 | VCL       | NM_003373.3    | 7414   | 1.9103 | 3.0043 | 2.6473 | 2.521 |
| ILMN_1685540 | SHRM      | NM_020859.1    | 57619  | 3.569  | 1.5471 | 2.4438 | 2.520 |
| ILMN_1724863 | TICAM1    | NM_182919.1    | 148022 | 1.5796 | 2.701  | 3.2782 | 2.520 |
| ILMN_2331232 | TNFRSF6B  | NM_032945.2    | 8771   | 2.8237 | 2.9008 | 1.8309 | 2.518 |
| ILMN_1733811 | JUP       | NM_002230.1    | 3728   | 3.3204 | 2.1935 | 2.0392 | 2.518 |
| ILMN_1763941 | LRRRC49   | NM_017691.2    | 54839  | 1.5019 | 3.4791 | 2.5676 | 2.516 |
| ILMN_2184184 | ANXA1     | NM_000700.1    | 301    | 1.2009 | 2.6771 | 3.6654 | 2.514 |
| ILMN_1688480 | CCND1     | NM_053056.2    | 595    | 2.9785 | 1.8475 | 2.7149 | 2.514 |
| ILMN_1787186 | NOV       | NM_002514.2    | 4856   | 3.892  | 2.2219 | 1.4252 | 2.513 |
| ILMN_1700081 | FST       | NM_013409.1    | 10468  | 1.3264 | 2.6115 | 3.584  | 2.507 |
| ILMN_2168314 | PGM3      | NM_015599.1    | 5238   | 1.0224 | 3.2385 | 3.2588 | 2.507 |
| ILMN_1697614 | NHP2L1    | NM_001003796.1 | 4809   | 1.0934 | 3.2083 | 3.2061 | 2.503 |
| ILMN_1802808 | LOC654103 | XM_939368.1    | 654103 | 1.7473 | 1.6215 | 4.1386 | 2.502 |
| ILMN_2116127 | NPEPPS    | NM_006310.2    | 9520   | 1.297  | 4.6374 | 1.555  | 2.496 |
| ILMN_1801504 | RUNX1     | NM_001754.3    | 861    | 1.3925 | 2.8251 | 3.2659 | 2.495 |
| ILMN_1738589 | MGLL      | NM_007283.5    | 11343  | 1.4604 | 3.0354 | 2.9831 | 2.493 |
| ILMN_1715886 | CNOT7     | NM_013354.5    | 29883  | 1.4032 | 3.3162 | 2.7511 | 2.490 |
| ILMN_1660436 | HSPA1B    | NM_005346.3    | 3304   | 1.0203 | 2.9242 | 3.5226 | 2.489 |
| ILMN_1771599 | PLOD2     | NM_000935.2    | 5352   | 2.886  | 2.3162 | 2.2598 | 2.487 |
| ILMN_1708502 | AFF4      | NM_014423.3    | 27125  | 1.7291 | 2.7812 | 2.9505 | 2.487 |
| ILMN_2330267 | ABCE1     | NM_001040876.1 | 6059   | 1.5551 | 2.9206 | 2.9813 | 2.486 |
| ILMN_1669323 | BACE2     | NM_138992.1    | 25825  | 2.6915 | 2.2901 | 2.4678 | 2.483 |
| ILMN_1731714 | CREB5     | NM_182898.2    | 9586   | 2.3145 | 2.5186 | 2.6133 | 2.482 |
| ILMN_2403889 | PRMT5     | NM_001039619.1 | 10419  | 1.3952 | 3.3737 | 2.6762 | 2.482 |
| ILMN_1782538 | VIM       | NM_003380.2    | 7431   | 1.0254 | 2.7557 | 3.6352 | 2.472 |
| ILMN_1767747 | HDAC2     | NM_001527.2    | 3066   | 1.1825 | 2.4462 | 3.7867 | 2.472 |
| ILMN_1727790 | KHDRBS3   | NM_006558.1    | 10656  | 2.6634 | 2.3998 | 3.2502 | 2.471 |
| ILMN_1791728 | SLC25A25  | NM_052901.2    | 114789 | 1.9532 | 3.3991 | 2.0578 | 2.470 |
| ILMN_2199768 | SLITRK4   | NM_173078.2    | 139065 | 2.1744 | 2.8509 | 2.367  | 2.464 |
| ILMN_1708391 | NR1H4     | NM_005123.1    | 9971   | 3.6495 | 1.9128 | 1.8277 | 2.463 |
| ILMN_1753584 | KRT8      | NM_002273.2    | 3856   | 3.8861 | 1.7281 | 1.7628 | 2.459 |
| ILMN_1779353 | PUS7      | NM_019042.3    | 54517  | 1.4192 | 2.9089 | 3.0256 | 2.451 |
| ILMN_2062112 | ZC3H15    | NM_018471.2    | 55854  | 1.0489 | 3.5034 | 2.7934 | 2.449 |
| ILMN_2093027 | MYO1B     | NM_012223.2    | 4430   | 1.2066 | 2.8509 | 3.2742 | 2.444 |
| ILMN_1730201 | DTNA      | NM_001392.3    | 1837   | 1.4034 | 2.8083 | 3.1196 | 2.444 |
| ILMN_2406151 | UMOD      | NM_001008389.1 | 7369   | 2.2872 | 2.3149 | 2.724  | 2.442 |
| ILMN_1782788 | CSDA      | NM_003651.3    | 8531   | 1.8901 | 2.4853 | 2.95   | 2.442 |
| ILMN_1746856 | RAB21     | NM_014999.2    | 23011  | 1.2419 | 3.6147 | 2.4594 | 2.439 |
| ILMN_1814998 | FKSG30    | NM_001017421.1 | 440915 | 2.4709 | 2.0024 | 2.8358 | 2.436 |
| ILMN_1805800 | RAB5A     | NM_004162.3    | 5868   | 1.4841 | 2.3893 | 3.4342 | 2.436 |
| ILMN_1713952 | C1orf106  | NM_018265.1    | 55765  | 4.1783 | 1.7114 | 1.4112 | 2.434 |
| ILMN_2041222 | FLJ40504  | NM_173624.1    | 284085 | 3.6695 | 1.4279 | 2.1966 | 2.431 |
| ILMN_1806030 | PPL       | NM_002705.4    | 5493   | 2.3715 | 2.7815 | 2.1406 | 2.431 |
| ILMN_1723884 | ARF4      | NM_001660.2    | 378    | 1.7906 | 3.6291 | 1.8666 | 2.429 |
| ILMN_1701877 | AXL       | NM_021913.2    | 558    | 2.8196 | 1.7326 | 2.7266 | 2.426 |
| ILMN_2222074 | PTPN12    | NM_002835.2    | 5782   | 1.5724 | 1.9935 | 3.7127 | 2.426 |
| ILMN_1802642 | TOM1L1    | NM_005486.1    | 10040  | 2.2848 | 2.7574 | 2.2346 | 2.426 |
| ILMN_1811909 | LOC402221 | XM_938988.1    | 402221 | 1.8689 | 3.4153 | 1.979  | 2.421 |
| ILMN_1694075 | GADD45A   | NM_001924.2    | 1647   | 2.1225 | 3.137  | 2.003  | 2.421 |
| ILMN_2358457 | ATF4      | NM_182810.1    | 468    | 1.0767 | 4.1721 | 2.0123 | 2.420 |
| ILMN_1764571 | ARHGAP23  | XM_290799.7    | 57636  | 1.5426 | 2.4553 | 3.2623 | 2.420 |
| ILMN_2219466 | APOBEC3B  | NM_004900.3    | 9582   | 1.1725 | 2.8074 | 3.2707 | 2.417 |
| ILMN_1682717 | IER3      | NM_003897.3    | 8870   | 1.8833 | 2.1068 | 3.2545 | 2.415 |
| ILMN_1687743 | BTBD7     | NM_001002860.2 | 55727  | 1.0979 | 3.4459 | 2.6869 | 2.410 |
| ILMN_1673899 | FAM57A    | NM_024792.1    | 79850  | 2.0988 | 2.5136 | 2.6073 | 2.407 |
| ILMN_1760593 | CRY1      | NM_004075.2    | 1407   | 1.0624 | 3.2002 | 2.9505 | 2.404 |
| ILMN_1699829 | CTGF      | NM_001901.1    | 1490   | 2.2969 | 2.2821 | 2.6192 | 2.399 |
| ILMN_2186137 | RRAD      | NM_004165.1    | 6236   | 1.4711 | 3.9046 | 1.8046 | 2.393 |
| ILMN_1788192 | ARMCX1    | NM_016608.1    | 51309  | 2.7241 | 2.9333 | 1.5209 | 2.393 |
| ILMN_1710284 | HES1      | NM_005524.2    | 3280   | 1.3839 | 2.3411 | 3.4438 | 2.390 |
| ILMN_1707553 | FAM59A    | NM_022751.1    | 64762  | 2.5326 | 2.5414 | 2.0945 | 2.390 |
| ILMN_1757845 | SPIRE1    | NM_020148.2    | 56907  | 2.2668 | 2.3756 | 2.5087 | 2.384 |
| ILMN_1727200 | SLCO4A1   | NM_016354.3    | 28231  | 2.2096 | 2.387  | 2.55   | 2.382 |
| ILMN_2397750 | IVNS1ABP  | NM_006469.4    | 10625  | 1.1278 | 4.5475 | 1.4658 | 2.380 |
| ILMN_1687867 | LOC647954 | XR_018676.1    | 647954 | 1.8717 | 1.9761 | 3.293  | 2.380 |
| ILMN_1772521 | MTHFD1L   | NM_015440.3    | 25902  | 1.7245 | 1.6959 | 3.7013 | 2.374 |
| ILMN_1717490 | RPL6      | NM_001024662.1 | 6128   | 1.2244 | 2.6282 | 3.2659 | 2.373 |
| ILMN_2384561 | TJP2      | NM_201629.1    | 9414   | 2.2138 | 2.0484 | 2.8327 | 2.365 |
| ILMN_1803799 | LOC649555 | XM_945579.1    | 649555 | 1.8296 | 3.336  | 1.9181 | 2.361 |
| ILMN_1707434 | LOC653778 | XM_929667.1    | 653778 | 1.3732 | 2.1036 | 3.6049 | 2.361 |
| ILMN_2409395 | CCNC      | NM_001013399.1 | 892    | 1.5065 | 3.4263 | 2.1483 | 2.360 |
| ILMN_1669497 | OSBPL10   | NM_017784.3    | 114884 | 1.4983 | 2.2171 | 3.3615 | 2.359 |
| ILMN_1671442 | WDR43     | XM_944889.1    | 23160  | 1.0884 | 3.063  | 2.9176 | 2.356 |
| ILMN_1731287 | ARFGAP3   | NM_014570.3    | 26286  | 1.1922 | 2.7776 | 3.0943 | 2.355 |
| ILMN_1804822 | SRXN1     | NM_080725.1    | 140809 | 1.8768 | 2.8276 | 2.3588 | 2.354 |
| ILMN_2161832 | VPS37A    | NM_152415.1    | 137492 | 1.2797 | 2.8993 | 2.8784 | 2.352 |
| ILMN_2263718 | SPAG9     | NM_003971.3    | 9043   | 1.4521 | 2.0446 | 3.5581 | 2.352 |
| ILMN_1658526 | RYK       | NM_001005861.2 | 6259   | 1.0852 | 3.0959 | 2.8657 | 2.349 |

|              |           |                |        |        |        |        |       |
|--------------|-----------|----------------|--------|--------|--------|--------|-------|
| ILMN_1655702 | ABHD5     | NM_016006.3    | 51099  | 1.7837 | 2.8509 | 2.3974 | 2.344 |
| ILMN_1651347 | SERTAD2   | NM_014755.1    | 9792   | 1.3385 | 2.6515 | 3.0323 | 2.341 |
| ILMN_1669362 | IGFBP6    | NM_002178.2    | 3489   | 2.8734 | 2.2425 | 1.9016 | 2.339 |
| ILMN_1795429 | VCL       | NM_014000.2    | 7414   | 3.1163 | 2.5236 | 1.3734 | 2.338 |
| ILMN_1691747 | KHDRBS3   | NM_006558.1    | 10656  | 3.0378 | 1.5842 | 2.3879 | 2.337 |
| ILMN_1802690 | GULP1     | NM_016315.2    | 51454  | 2.0451 | 2.3155 | 2.6425 | 2.334 |
| ILMN_2138765 | ADFP      | NM_001122.2    | 123    | 1.3038 | 2.8703 | 2.8289 | 2.334 |
| ILMN_1782412 | IRX2      | NM_033267.3    | 153572 | 3.3298 | 2.5904 | 1.073  | 2.331 |
| ILMN_1739428 | IFIT2     | NM_001547.4    | 3433   | 2.2127 | 1.1338 | 3.6352 | 2.327 |
| ILMN_2220187 | GFPT1     | NM_002056.1    | 2673   | 1.6218 | 3.2063 | 2.1531 | 2.327 |
| ILMN_1671149 | MEG3      | NR_002766.1    |        | 1.194  | 3.1649 | 2.6194 | 2.326 |
| ILMN_1653180 | TPM4      | NM_003290.1    | 7171   | 1.7225 | 2.4964 | 2.7556 | 2.325 |
| ILMN_1814787 | ICA1      | NM_004968.2    | 3382   | 1.1854 | 4.1613 | 1.6172 | 2.321 |
| ILMN_1722726 | RICS      | NM_014715.2    | 9743   | 2.074  | 2.3412 | 2.5443 | 2.320 |
| ILMN_1680139 | MAFF      | NM_012323.2    | 23764  | 1.7472 | 2.6537 | 2.5498 | 2.317 |
| ILMN_1757384 | RAN       | NM_006325.2    | 5901   | 1.3838 | 2.3545 | 3.193  | 2.310 |
| ILMN_1756992 | MUC1      | NM_001044391.1 | 4582   | 2.6891 | 1.5613 | 2.6733 | 2.308 |
| ILMN_1658504 | CHKA      | NM_212469.1    | 1119   | 1.0724 | 3.0425 | 2.8088 | 2.308 |
| ILMN_2380243 | LOC57228  | NM_001031628.1 | 57228  | 1.64   | 2.6819 | 2.5904 | 2.304 |
| ILMN_1660451 | STARD13   | NM_178008.1    | 90627  | 2.3256 | 2.8152 | 1.7706 | 2.304 |
| ILMN_1762899 | EGR1      | NM_001964.2    | 1958   | 1.5777 | 2.1983 | 3.1326 | 2.303 |
| ILMN_1651254 | LPP       | NM_005578.2    | 4026   | 1.7394 | 2.486  | 2.6739 | 2.300 |
| ILMN_2115125 | CTGF      | NM_001901.2    | 1490   | 2.1196 | 1.9322 | 2.8468 | 2.300 |
| ILMN_1779258 | LOC644774 | XM_927868.1    | 644774 | 1.5355 | 3.1233 | 2.2362 | 2.298 |
| ILMN_1706817 | SERP1     | NM_014445.3    | 27230  | 1.8232 | 2.9112 | 2.1586 | 2.298 |
| ILMN_1667519 | RRA52     | NM_012250.3    | 22800  | 1.966  | 3.045  | 1.8695 | 2.294 |
| ILMN_1724789 | CD59      | NM_000611.4    | 966    | 3.4655 | 1.7862 | 1.6217 | 2.291 |
| ILMN_1686811 | LOC402644 | XM_938297.1    | 402644 | 1.4571 | 2.6503 | 2.7642 | 2.291 |
| ILMN_2061435 | MEG3      | NR_002766.1    | 55384  | 1.3894 | 1.3946 | 4.0734 | 2.286 |
| ILMN_2087692 | CYBRD1    | NM_024843.2    | 79901  | 1.9362 | 2.1186 | 2.8    | 2.285 |
| ILMN_1687301 | VCAN      | NM_004385.2    | 1462   | 3.3055 | 1.5433 | 1.9943 | 2.281 |
| ILMN_1714278 | C9orf30   | NM_080655.1    | 91283  | 1.7322 | 2.8708 | 2.2368 | 2.280 |
| ILMN_1811836 | DYNC2LI1  | NM_016008.2    | 51626  | 1.7823 | 2.8123 | 2.2367 | 2.277 |
| ILMN_1679267 | TGM2      | NM_198951.1    | 7052   | 2.1229 | 1.1217 | 3.5809 | 2.275 |
| ILMN_1724959 | SEC31A    | NM_014933.2    | 22872  | 1.2285 | 4.3753 | 1.2184 | 2.274 |
| ILMN_1716687 | TPM1      | NM_001018020.1 | 7168   | 4.0775 | 1.3584 | 1.3854 | 2.274 |
| ILMN_1699265 | TNFRSF10B | NM_003842.3    | 8795   | 1.2092 | 3.0086 | 2.5983 | 2.272 |
| ILMN_2336781 | SOD2      | NM_001024465.1 | 6648   | 1.734  | 1.5956 | 3.4845 | 2.271 |
| ILMN_1695509 | PTPN12    | NM_002835.2    | 5782   | 1.8023 | 2.5967 | 2.4025 | 2.267 |
| ILMN_1713964 | BTBD3     | NM_014962.2    | 22903  | 2.2406 | 2.3596 | 2.2007 | 2.267 |
| ILMN_1707727 | ANGPTL4   | NM_139314.1    | 51129  | 2.0486 | 1.3305 | 3.4184 | 2.266 |
| ILMN_1783287 | S100A14   | NM_020672.1    | 57402  | 1.9682 | 2.3912 | 2.4364 | 2.265 |
| ILMN_1655884 | ATP2A2    | NM_170665.2    | 488    | 1.6736 | 2.943  | 2.1755 | 2.264 |
| ILMN_1677814 | ABCC3     | NM_003786.2    | 8714   | 2.4754 | 1.5019 | 2.812  | 2.263 |
| ILMN_1736939 | UGCG      | NM_003358.1    | 7357   | 1.8151 | 2.5976 | 2.3745 | 2.262 |
| ILMN_2225318 | SMS       | NM_004595.2    | 6611   | 2.2419 | 2.3506 | 2.1915 | 2.261 |
| ILMN_1653856 | STS-1     | NM_032873.3    | 84959  | 1.4597 | 2.3534 | 2.9653 | 2.259 |
| ILMN_1783023 | LOC285636 | NM_175921.4    | 285636 | 1.138  | 2.9106 | 2.7284 | 2.259 |
| ILMN_1682792 | BYSL      | NM_004053.3    | 705    | 1.518  | 1.9249 | 3.3288 | 2.257 |
| ILMN_1679640 | FXR1      | NM_005087.2    | 8087   | 1.0599 | 2.2597 | 3.4494 | 2.256 |
| ILMN_1812262 | DDR1      | NM_013993.2    | 780    | 2.9161 | 1.7915 | 2.0592 | 2.256 |
| ILMN_2411897 | KLF10     | NM_005655.1    | 7071   | 1.3149 | 2.4808 | 2.9696 | 2.255 |
| ILMN_1815121 | PLAGL1    | NM_001080951.1 | 5325   | 1.6073 | 2.8251 | 2.3242 | 2.252 |
| ILMN_2068104 | TFFI2     | NM_006528.2    | 7980   | 1.3711 | 1.2596 | 4.1221 | 2.251 |
| ILMN_1684308 | DEFB103B  | NM_001081551.2 | 414325 | 1.0803 | 2.7139 | 2.9577 | 2.251 |
| ILMN_1741003 | ANXA5     | NM_001154.2    | 308    | 1.9018 | 2.3057 | 2.537  | 2.248 |
| ILMN_2375002 | MAP4K4    | NM_145687.2    | 9448   | 1.2839 | 3.0482 | 2.4119 | 2.248 |
| ILMN_1657111 | C14orf78  | XM_001132404.1 | 113146 | 2.9689 | 1.2498 | 2.524  | 2.248 |
| ILMN_1783846 | RAPH1     | NM_213589.1    | 65059  | 2.2789 | 1.6851 | 2.7765 | 2.247 |
| ILMN_1752526 | IBRDC2    | NM_182757.2    | 255488 | 2.1908 | 1.9271 | 2.6199 | 2.246 |
| ILMN_1687757 | AKR1C4    | NM_001818.2    | 1109   | 3.1044 | 1.7991 | 1.8282 | 2.244 |
| ILMN_2319292 | PAX8      | NM_013953.3    | 7849   | 2.9057 | 2.5831 | 1.2374 | 2.242 |
| ILMN_1656369 | C8orf4    | NM_020130.3    | 56892  | 2.6898 | 1.3225 | 2.6879 | 2.233 |
| ILMN_2410986 | STAT3     | NM_139276.2    | 6774   | 1.5407 | 2.981  | 2.178  | 2.233 |
| ILMN_1676846 | ABCE1     | NM_001040876.1 | 6059   | 1.3072 | 2.9115 | 2.4754 | 2.231 |
| ILMN_1744268 | PLEC1     | NM_000445.2    | 5339   | 1.0699 | 2.3617 | 3.2546 | 2.229 |
| ILMN_1737252 | NRG1      | NM_013962.2    | 3084   | 1.7642 | 2.5945 | 2.3242 | 2.228 |
| ILMN_1680814 | EDN2      | NM_001956.2    | 1907   | 1.0227 | 2.7438 | 2.9115 | 2.226 |
| ILMN_1685397 | ITGA3     | NM_002204.1    | 3675   | 2.5362 | 2.1192 | 2.0128 | 2.223 |
| ILMN_1652918 | RHOF      | NM_019034.2    | 54509  | 1.1561 | 2.9416 | 2.5443 | 2.214 |
| ILMN_1700967 | C3orf59   | NM_178496.2    | 151963 | 1.5394 | 2.4575 | 2.6213 | 2.206 |
| ILMN_1665510 | ERRFI1    | NM_018948.2    | 54206  | 2.7749 | 2.2874 | 1.5508 | 2.204 |
| ILMN_1731044 | KCTD14    | NM_023930.3    | 65987  | 2.1061 | 3.1075 | 1.392  | 2.202 |
| ILMN_1728049 | S100A16   | NM_080388.1    | 140576 | 2.8737 | 1.7278 | 2.0035 | 2.202 |
| ILMN_1785175 | SWAP70    | NM_015055.2    | 23075  | 1.0745 | 2.0121 | 3.5085 | 2.198 |
| ILMN_1763260 | HIF1A     | NM_001530.2    | 3091   | 1.6876 | 2.6232 | 2.2751 | 2.195 |
| ILMN_1698100 | ANXA2P1   | NR_001562.1    |        | 2.6499 | 1.7574 | 2.1749 | 2.194 |
| ILMN_1694325 | NFIX      | NM_002501.2    | 4784   | 1.7598 | 3.6658 | 1.155  | 2.194 |
| ILMN_1697817 | PANX1     | NM_015368.3    | 24145  | 1.7385 | 2.3424 | 2.4985 | 2.193 |
| ILMN_1652331 | KCTD5     | NM_018992.2    | 54442  | 1.0458 | 2.9016 | 2.6227 | 2.190 |
| ILMN_2220978 | NROB2     | NM_021969.1    | 8431   | 1.6484 | 2.299  | 2.6128 | 2.187 |
| ILMN_1798975 | EGFR      | NM_005228.3    | 1956   | 3.6456 | 1.6699 | 1.2401 | 2.185 |
| ILMN_2405254 | GRB7      | NM_001030002.1 | 2886   | 3.6227 | 1.6921 | 1.238  | 2.184 |
| ILMN_2318011 | PSMA3     | NM_002788.2    | 5684   | 1.4435 | 2.6798 | 2.4254 | 2.183 |
| ILMN_1675387 | LIMS1     | NM_004987.3    | 3987   | 1.5525 | 2.3343 | 2.6371 | 2.175 |
| ILMN_1656386 | SEC24D    | NM_014822.1    | 9871   | 1.3812 | 3.0437 | 2.0969 | 2.174 |
| ILMN_2294762 | AMY1A     | NM_004038.3    | 276    | 1.3757 | 2.0101 | 3.1273 | 2.171 |
| ILMN_1661197 | CLCF1     | NM_013246.2    | 23529  | 1.0069 | 2.1886 | 3.3136 | 2.170 |
| ILMN_1794501 | HAS3      | NM_005329.2    | 3038   | 2.0262 | 2.2076 | 2.273  | 2.169 |
| ILMN_1735360 | SDAD1     | NM_018115.2    | 55153  | 1.1307 | 3.8395 | 1.5329 | 2.168 |

|              |           |                |        |        |        |        |       |
|--------------|-----------|----------------|--------|--------|--------|--------|-------|
| ILMN_2232463 | ARL14     | NM_025047.1    | 80117  | 2.8504 | 2.0589 | 1.5782 | 2.163 |
| ILMN_1730229 | CGNL1     | NM_032866.3    | 84952  | 3.5288 | 1.7627 | 1.1953 | 2.162 |
| ILMN_1706434 | LOC440359 | XM_496143.2    | 440359 | 2.3707 | 2.1243 | 1.9909 | 2.162 |
| ILMN_1737475 | ABHD11    | NM_148912.2    | 83451  | 1.7306 | 2.0864 | 2.6544 | 2.157 |
| ILMN_1702447 | IGF2BP2   | NM_006548.4    | 10644  | 2.1686 | 2.5652 | 1.7275 | 2.154 |
| ILMN_1794392 | DDX3X     | NM_001356.3    | 1654   | 1.1346 | 2.5295 | 2.7858 | 2.150 |
| ILMN_2105983 | XRCC5     | NM_021141.2    | 7520   | 1.0284 | 2.6929 | 2.7242 | 2.149 |
| ILMN_1796712 | S100A10   | NM_002966.1    | 6281   | 1.2407 | 2.51   | 2.6893 | 2.147 |
| ILMN_1685661 | RRP15     | NM_016052.3    | 51018  | 1.2407 | 2.1638 | 3.0346 | 2.146 |
| ILMN_2341254 | STARD13   | NM_178006.1    | 90627  | 2.0613 | 2      | 2.3773 | 2.146 |
| ILMN_1790518 | PHF16     | NM_001077445.1 | 9767   | 1.2576 | 2.604  | 2.5759 | 2.146 |
| ILMN_1686116 | THBS1     | NM_003246.2    | 7057   | 2.4309 | 1.4434 | 2.5608 | 2.145 |
| ILMN_1773427 | ANKRD15   | NM_015158.2    | 23189  | 2.3301 | 2.9359 | 1.1675 | 2.145 |
| ILMN_1728256 | SPAG9     | NM_003971.3    | 9043   | 1.0662 | 2.5699 | 2.7909 | 2.142 |
| ILMN_1815079 | TICAM1    | NM_182919.1    | 148022 | 1.202  | 2.7391 | 2.4854 | 2.142 |
| ILMN_1782863 | FAM83B    | NM_001010872.1 | 222584 | 2.0158 | 2.4043 | 2.0023 | 2.141 |
| ILMN_1703946 | ADORA2B   | NM_000676.2    | 136    | 1.7642 | 2.3288 | 2.3288 | 2.141 |
| ILMN_2046730 | S100A10   | NM_002966.2    | 6281   | 1.2565 | 2.4719 | 2.6905 | 2.140 |
| ILMN_1692785 | KLHL21    | NM_014851.2    | 9903   | 1.473  | 2.7414 | 2.2031 | 2.139 |
| ILMN_2355463 | CYFIP1    | NM_001033028.1 | 23191  | 2.2893 | 1.9885 | 2.1391 | 2.139 |
| ILMN_1813120 | MAP4K3    | NM_003618.2    | 8491   | 1.2648 | 2.8806 | 2.2684 | 2.138 |
| ILMN_1678629 | DOCK7     | NM_033407.2    | 85440  | 1.4433 | 1.7713 | 3.1981 | 2.138 |
| ILMN_1791890 | SPON1     | NM_006108.2    | 10418  | 2.2747 | 2.6987 | 1.4357 | 2.136 |
| ILMN_1729987 | SRC       | NM_198291.1    | 6714   | 1.8763 | 2.9408 | 1.5791 | 2.132 |
| ILMN_1734544 | WTAP      | NM_004906.3    | 9589   | 1.286  | 2.5365 | 2.5513 | 2.125 |
| ILMN_1682636 | CXCL2     | NM_002089.3    | 2920   | 2.0852 | 1.452  | 2.835  | 2.124 |
| ILMN_1765725 | SBDSP     | NR_001588.1    | 155370 | 1.1549 | 2.622  | 2.5945 | 2.124 |
| ILMN_1708093 | ARHGEF5   | NM_005435.3    | 7984   | 1.64   | 2.9643 | 1.7556 | 2.120 |
| ILMN_1802109 | KBTBD9    | XM_001134449.1 | 114818 | 2.118  | 1.9894 | 2.2453 | 2.118 |
| ILMN_1707339 | BTG3      | NM_006806.3    | 10950  | 1.0752 | 2.2212 | 3.0486 | 2.115 |
| ILMN_1717477 | PSD3      | NM_015310.3    | 23362  | 2.5967 | 1.6492 | 2.0919 | 2.113 |
| ILMN_2143795 | MGC4677   | NM_052871.3    | 112597 | 1.3402 | 2.3127 | 2.6814 | 2.111 |
| ILMN_1679217 | FAM110B   | NM_147189.2    | 90362  | 2.2539 | 2.4842 | 1.585  | 2.108 |
| ILMN_1756049 | NT5DC3    | NM_016575.1    | 51559  | 1.2109 | 1.9932 | 3.1149 | 2.106 |
| ILMN_1758323 | ACPP      | NM_001099.2    | 55     | 1.7541 | 2.3781 | 2.1851 | 2.106 |
| ILMN_1744299 | GPR110    | NM_153840.2    | 266977 | 2.1391 | 2.1208 | 2.0552 | 2.105 |
| ILMN_1800220 | KCTD3     | NM_016121.3    | 51133  | 1.6926 | 2.5831 | 2.0372 | 2.104 |
| ILMN_1682015 | GAL       | NM_015973.3    | 51083  | 2.2785 | 1.3456 | 2.6847 | 2.103 |
| ILMN_2072357 | IRF6      | NM_006147.2    | 3664   | 1.6227 | 2.7436 | 1.9421 | 2.103 |
| ILMN_1743714 | CARD10    | NM_014550.3    | 29775  | 2.0917 | 3.2116 | 1.0028 | 2.102 |
| ILMN_2368971 | PSMD12    | NM_002816.3    | 5718   | 1.3348 | 2.8964 | 2.0745 | 2.102 |
| ILMN_1686516 | CUGBP1    | NM_001025596.1 | 10658  | 1.0293 | 2.8046 | 2.4718 | 2.102 |
| ILMN_2089073 | ATP9A     | NM_006045.1    | 10079  | 2.3502 | 2.6395 | 1.3141 | 2.101 |
| ILMN_1666503 | DENND2A   | NM_0015689.2   | 27147  | 3.3105 | 1.4018 | 1.5849 | 2.099 |
| ILMN_1785061 | EPHB2     | NM_017449.3    | 2048   | 2.3918 | 1.8235 | 2.0816 | 2.099 |
| ILMN_1744912 | CTTN      | NM_005231.2    | 2017   | 2.6694 | 1.6799 | 1.9426 | 2.097 |
| ILMN_1766499 | HSPA2     | NM_021979.3    | 3306   | 2.0575 | 1.7542 | 2.4729 | 2.095 |
| ILMN_1654735 | SLCO3A1   | NM_013272.2    | 28232  | 1.1352 | 2.0389 | 3.1102 | 2.095 |
| ILMN_1672759 | CCDC109A  | NM_138357.1    | 90550  | 1.1319 | 2.2016 | 2.9505 | 2.095 |
| ILMN_2413816 | GRB14     | NM_004490.2    | 2888   | 1.7057 | 2.5831 | 1.9941 | 2.094 |
| ILMN_1738578 | FILIP1L   | NM_014890.2    | 11259  | 1.9953 | 2.004  | 2.2825 | 2.094 |
| ILMN_1788547 | GCLM      | NM_002061.2    | 2730   | 1.9928 | 2.137  | 2.1443 | 2.091 |
| ILMN_2346573 | PSME3     | NM_005789.2    | 10197  | 1.1015 | 3.5074 | 1.6587 | 2.089 |
| ILMN_2381758 | G3BP2     | NM_203504.1    | 9908   | 1.4372 | 2.923  | 1.8997 | 2.087 |
| ILMN_1713829 | PTGES     | NM_004878.3    | 9536   | 1.3273 | 1.7889 | 3.1342 | 2.083 |
| ILMN_1733831 | PGBD5     | NM_024554.2    | 79605  | 2.0803 | 1.9039 | 2.2542 | 2.079 |
| ILMN_1757287 | MAPK6     | NM_002748.2    | 5597   | 1.544  | 2.7242 | 1.9647 | 2.078 |
| ILMN_1773760 | PAICS     | NM_006452.3    | 10606  | 2.1317 | 2.0119 | 2.0844 | 2.076 |
| ILMN_1783684 | LOC648695 | XM_944246.2    | 648695 | 1.008  | 2.9391 | 2.278  | 2.075 |
| ILMN_1753639 | MTAP      | NM_002451.3    | 4507   | 1.2133 | 2.3787 | 2.6323 | 2.075 |
| ILMN_1770245 | EPB41L5   | NM_020909.2    | 57669  | 1.1509 | 2.4788 | 2.5864 | 2.072 |
| ILMN_2413833 | TNRC9     | NM_001080430.1 | 27324  | 1.6521 | 2.3589 | 2.2022 | 2.071 |
| ILMN_1665736 | LOC648024 | XR_018316.1    | 648024 | 1.6978 | 1.9911 | 2.5242 | 2.071 |
| ILMN_1804895 | C7orf53   | NM_182597.1    | 286006 | 1.6091 | 2.5285 | 2.0726 | 2.070 |
| ILMN_1780671 | PLEKHG3   | NM_015549.1    | 26030  | 1.7642 | 2.2541 | 2.1909 | 2.070 |
| ILMN_2383934 | ITGB1     | NM_033669.1    | 3688   | 2.4612 | 1.9484 | 1.7973 | 2.069 |
| ILMN_1713846 | PPM1H     | NM_020700.1    | 57460  | 2.4705 | 1.8299 | 1.8993 | 2.067 |
| ILMN_1764709 | MAFB      | NM_005461.3    | 9935   | 1.9752 | 1.6432 | 2.5693 | 2.063 |
| ILMN_2346479 | HOMER2    | NM_199332.2    | 9455   | 1.995  | 2.3261 | 1.8644 | 2.062 |
| ILMN_1755649 | SLC16A5   | NM_004695.2    | 9121   | 1.8179 | 3.0692 | 1.2952 | 2.061 |
| ILMN_1740762 | GRB7      | NM_005310.2    | 2886   | 2.2942 | 2.1851 | 1.6987 | 2.059 |
| ILMN_1745798 | GTF2F2    | NM_004128.1    | 2963   | 1.773  | 2.8405 | 1.561  | 2.058 |
| ILMN_1694548 | ANXA3     | NM_005139.2    | 306    | 2.7561 | 1.5241 | 1.8919 | 2.057 |
| ILMN_1714820 | ITGB1     | NM_033668.1    | 3688   | 2.4734 | 1.8971 | 1.7871 | 2.053 |
| ILMN_1790529 | LUM       | NM_002345.3    | 4060   | 2.2441 | 1.7013 | 2.2026 | 2.049 |
| ILMN_1695290 | PLEKHC1   | NM_006832.1    | 10979  | 1.9745 | 2.2583 | 1.9124 | 2.048 |
| ILMN_2411745 | EML1      | NM_004434.2    | 2009   | 2.3646 | 2.0791 | 1.7011 | 2.048 |
| ILMN_1692058 | NDN       | NM_002487.2    | 4692   | 2.8538 | 1.2598 | 2.0301 | 2.048 |
| ILMN_1673896 | MAP3K13   | NM_004721.3    | 9175   | 1.8224 | 2.0726 | 2.2298 | 2.042 |
| ILMN_1674985 | TMEM51    | NM_018022.1    | 55092  | 2.5266 | 1.7844 | 1.8111 | 2.041 |
| ILMN_1741404 | MSC       | NM_005098.3    | 9242   | 1.6469 | 2.2086 | 2.2659 | 2.040 |
| ILMN_2076463 | SLC15A4   | NM_145648.1    | 121260 | 1.0863 | 3.2435 | 1.7892 | 2.040 |
| ILMN_2142284 | SLC25A43  | NM_145305.1    | 203427 | 1.0799 | 2.6203 | 2.4145 | 2.038 |
| ILMN_1708934 | ADM       | NM_001124.1    | 133    | 1.3497 | 2.1073 | 2.6547 | 2.037 |
| ILMN_1707312 | NFIL3     | NM_005384.2    | 4783   | 1.1735 | 2.3205 | 2.6144 | 2.036 |
| ILMN_1802205 | RHOB      | NM_004040.2    | 388    | 1.3879 | 2.9174 | 1.7904 | 2.032 |
| ILMN_2367384 | EPHB2     | NM_004442.6    | 2048   | 2.183  | 1.8884 | 2.0222 | 2.031 |
| ILMN_1672596 | BCAR1     | NM_014567.2    | 9564   | 1.6689 | 2.6291 | 1.7943 | 2.031 |
| ILMN_2324002 | CALD1     | NM_033157.2    | 800    | 1.577  | 2.7001 | 1.8145 | 2.031 |
| ILMN_1799139 | PLOD2     | NM_182943.2    | 5352   | 1.5812 | 1.9922 | 2.5146 | 2.029 |

|              |           |                |        |        |        |        |       |
|--------------|-----------|----------------|--------|--------|--------|--------|-------|
| ILMN_1667893 | TNS3      | NM_022748.10   | 64759  | 2.5557 | 2.1434 | 1.3745 | 2.025 |
| ILMN_1664099 | GLIS3     | NM_152629.3    | 169792 | 2.2126 | 1.9829 | 1.8776 | 2.024 |
| ILMN_1786328 | WDR40A    | NM_015397.1    | 25853  | 1.0466 | 1.9204 | 3.1021 | 2.023 |
| ILMN_1771376 | PEA15     | NM_003768.2    | 8682   | 1.5275 | 1.7058 | 2.8265 | 2.020 |
| ILMN_1723042 | CLDN3     | NM_001306.2    | 1365   | 3.2249 | 1.7201 | 1.1082 | 2.018 |
| ILMN_2115218 | ANKRD10   | NM_017664.2    | 55608  | 1.3025 | 3.3515 | 1.3962 | 2.017 |
| ILMN_1724700 | RIOK3     | NM_003831.3    | 8780   | 1.2052 | 2.8505 | 1.9944 | 2.017 |
| ILMN_1738989 | GOLSYN    | NM_001099743.1 | 55638  | 2.2428 | 1.9872 | 1.8149 | 2.015 |
| ILMN_1729596 | C14orf151 | NM_032714.1    | 84800  | 1.4742 | 2.4021 | 2.1674 | 2.015 |
| ILMN_1673676 | SNX5      | NM_152227.1    | 27131  | 1.0367 | 2.7574 | 2.2456 | 2.013 |
| ILMN_1732921 | ITGB8     | NM_002214.2    | 3696   | 1.1857 | 2.633  | 2.2208 | 2.013 |
| ILMN_1699489 | TUBB6     | XM_940079.1    | 84617  | 1.5215 | 2.1373 | 2.3785 | 2.012 |
| ILMN_2392546 | PAICS     | NM_006452.2    | 10606  | 2.2209 | 1.9799 | 1.83   | 2.010 |
| ILMN_1716988 | OPN3      | NM_014322.2    | 23596  | 2.3793 | 1.7579 | 1.8876 | 2.008 |
| ILMN_1718046 | ARNT2     | NM_014862.3    | 9915   | 2.1992 | 1.8566 | 1.9685 | 2.008 |
| ILMN_2041236 | GARNL4    | NM_015085.3    | 23108  | 1.8929 | 1.5964 | 2.532  | 2.007 |
| ILMN_1744023 | MGC18216  | XM_927732.1    | 145815 | 1.5543 | 2.0105 | 2.4553 | 2.007 |
| ILMN_1728512 | YWHAH     | NM_003405.3    | 7533   | 1.6061 | 2.0018 | 2.3999 | 2.003 |
| ILMN_1719599 | SYTL4     | NM_080737.1    | 94121  | 1.6542 | 2.5443 | 1.8008 | 2.000 |
| ILMN_1778803 | ZFAND6    | NM_019006.2    | 54469  | 1.274  | 2.164  | 2.56   | 1.999 |
| ILMN_1733956 | IARS      | NM_002161.3    | 3376   | 1.4953 | 3.4277 | 1.0701 | 1.998 |
| ILMN_1675448 | ZFP36L1   | NM_004926.2    | 677    | 1.2217 | 2.2212 | 2.546  | 1.996 |
| ILMN_1688154 | MST1R     | NM_002447.2    | 4486   | 2.203  | 2.0026 | 1.7681 | 1.991 |
| ILMN_1721901 | CTNNA1    | NM_003798.2    | 8727   | 1.9195 | 1.7715 | 2.2816 | 1.991 |
| ILMN_1750101 | S100A11   | NM_005620.1    | 6282   | 2.1473 | 1.2902 | 2.5323 | 1.990 |
| ILMN_1659099 | ROCK2     | NM_004850.3    | 9475   | 1.0904 | 2.3559 | 2.5226 | 1.990 |
| ILMN_1676799 | MFAP1     | NM_005926.2    | 4236   | 1.0966 | 2.975  | 1.8968 | 1.989 |
| ILMN_1659106 | PHLDA3    | NM_012396.3    | 23612  | 1.8112 | 2.1122 | 2.0434 | 1.989 |
| ILMN_1759232 | IRS1      | NM_005544.1    | 3667   | 2.0434 | 1.9624 | 1.9584 | 1.988 |
| ILMN_1675669 | IBTK      | NM_015525.2    | 25998  | 1.1976 | 3.6466 | 1.119  | 1.988 |
| ILMN_1815057 | PDGFRB    | NM_002609.3    | 5159   | 1.8239 | 1.5591 | 2.5733 | 1.985 |
| ILMN_1754126 | SH2D5     | XM_375698.3    | 400745 | 2.0145 | 1.9184 | 2.0234 | 1.985 |
| ILMN_1813641 | C9orf167  | NM_017723.2    | 54863  | 1.4276 | 2.394  | 2.126  | 1.983 |
| ILMN_1708167 | CDCP1     | NM_178181.1    | 64866  | 1.5745 | 2.4279 | 1.9419 | 1.981 |
| ILMN_1719518 | ARF4      | NM_001660.2    | 378    | 1.7696 | 2.551  | 1.6165 | 1.979 |
| ILMN_1718863 | KCNK1     | NM_002245.2    | 3775   | 3.4987 | 1.0499 | 1.3817 | 1.977 |
| ILMN_2376723 | CDKN2B    | NM_078487.2    | 1030   | 2.5594 | 1.6115 | 1.7574 | 1.976 |
| ILMN_1701514 | TRAF3IP2  | NM_147686.1    | 10758  | 1.1094 | 2.8171 | 1.9952 | 1.974 |
| ILMN_2385278 | WDR21A    | NM_015604.2    | 26094  | 1.0818 | 2.3397 | 2.4985 | 1.973 |
| ILMN_1660345 | NGRN      | NM_016645.2    | 51335  | 1.1074 | 3.0669 | 1.7396 | 1.971 |
| ILMN_1683179 | RRAD      | NM_004165.1    | 6236   | 1.2418 | 1.2182 | 3.4508 | 1.970 |
| ILMN_1775405 | ARL4A     | NM_005738.3    | 10124  | 1.2362 | 2.3664 | 2.3008 | 1.968 |
| ILMN_1701441 | EDG2      | NM_057159.2    | 1902   | 2.3084 | 1.5475 | 2.0442 | 1.967 |
| ILMN_1686805 | CRK       | NM_016823.2    | 1398   | 1.4702 | 2.1872 | 2.2385 | 1.965 |
| ILMN_1784217 | SOX15     | NM_006942.1    | 6665   | 2.3346 | 2.152  | 1.4064 | 1.964 |
| ILMN_1685480 | TARS      | NM_152295.3    | 6897   | 1.1114 | 3.2117 | 1.5692 | 1.964 |
| ILMN_2367239 | DSCR1     | NM_203417.1    | 1827   | 1.4397 | 2.6764 | 1.7611 | 1.959 |
| ILMN_1707236 | HCCS      | NM_005333.2    | 3052   | 1.7169 | 1.674  | 2.4847 | 1.959 |
| ILMN_2230902 | CTNNA1    | NM_001903.2    | 1495   | 2.358  | 2.0789 | 1.436  | 1.958 |
| ILMN_2378048 | HNRPK     | NM_031263.1    | 3190   | 1.4786 | 2.2221 | 2.171  | 1.957 |
| ILMN_2359789 | RAC1      | NM_006908.3    | 5879   | 1.9392 | 1.8679 | 2.064  | 1.957 |
| ILMN_1677314 | MUC1      | NM_002456.4    | 4582   | 1.4064 | 2.034  | 2.4257 | 1.955 |
| ILMN_1727740 | SYNCRIP   | NM_006372.3    | 10492  | 2.0109 | 2.2635 | 1.5892 | 1.955 |
| ILMN_1732612 | SHB       | NM_003028.2    | 6461   | 1.8323 | 1.6764 | 2.3537 | 1.954 |
| ILMN_2322552 | NCKAP1    | NM_013436.3    | 10787  | 3.0751 | 1.4776 | 1.3021 | 1.952 |
| ILMN_1789233 | VPS37C    | NM_017966.4    | 55048  | 1.5108 | 2.1042 | 2.2364 | 1.950 |
| ILMN_1753607 | PNO1      | NM_020143.2    | 56902  | 1.0726 | 2.6594 | 2.1181 | 1.950 |
| ILMN_1748844 | CNKSR3    | NM_173515.2    | 154043 | 2.2925 | 1.3238 | 2.2224 | 1.946 |
| ILMN_1670807 | FAM84B    | NM_174911.3    | 157638 | 2.2947 | 2.0308 | 1.5004 | 1.942 |
| ILMN_1667199 | SQRDL     | NM_021199.2    | 58472  | 1.3341 | 2.5878 | 1.897  | 1.940 |
| ILMN_2374164 | HERPUD1   | NM_001010990.1 | 9709   | 1.3474 | 2.3994 | 2.0625 | 1.936 |
| ILMN_2341548 | MYO5B     | NM_001080467.1 | 4645   | 1.7404 | 1.8993 | 2.1597 | 1.933 |
| ILMN_1742981 | TUBA1A    | NM_006009.2    | 7846   | 1.3786 | 1.9773 | 2.4403 | 1.932 |
| ILMN_2049766 | NFE2L3    | NM_004289.5    | 9603   | 1.8485 | 1.8429 | 2.0969 | 1.929 |
| ILMN_1737396 | PSMD14    | NM_005805.3    | 10213  | 1.4973 | 1.9816 | 2.3034 | 1.927 |
| ILMN_1661137 | SH3RF2    | NM_152550.2    | 153769 | 1.9564 | 2.1851 | 1.6369 | 1.926 |
| ILMN_1778177 | ZNF207    | NM_001032293.2 | 7756   | 1.1422 | 2.8774 | 1.7547 | 1.925 |
| ILMN_1699476 | RPE       | NM_199229.1    | 6120   | 1.4379 | 2.3762 | 1.9602 | 1.925 |
| ILMN_1658499 | SYT13     | NM_020826.1    | 57586  | 1.2834 | 3.0419 | 1.436  | 1.920 |
| ILMN_1701058 | TATDN1    | NM_032026.2    | 83940  | 1.1375 | 3.2187 | 1.4029 | 1.920 |
| ILMN_1679322 | SH2D4A    | NM_022071.2    | 63898  | 2.5069 | 1.2241 | 2.0256 | 1.919 |
| ILMN_1784602 | CDKN1A    | NM_000389.2    | 1026   | 1.5059 | 1.6899 | 2.5602 | 1.919 |
| ILMN_1740585 | UMOD      | NM_003361.2    | 7369   | 1.7957 | 1.6433 | 2.3154 | 1.918 |
| ILMN_2152131 | ACTB      | NM_001101.2    | 60     | 1.205  | 2.0602 | 2.4845 | 1.917 |
| ILMN_1688639 | FBXL2     | NM_012157.2    | 25827  | 2.1391 | 2.4448 | 1.1518 | 1.912 |
| ILMN_1791232 | SPRED2    | NM_181784.1    | 200734 | 1.1523 | 2.5066 | 2.0726 | 1.911 |
| ILMN_1673711 | HSP90AB1  | NM_007355.2    | 3326   | 1.0643 | 2.1151 | 2.5508 | 1.910 |
| ILMN_1787308 | PIP5K2C   | NM_024779.3    | 79837  | 1.2523 | 2.5658 | 1.898  | 1.905 |
| ILMN_1668540 | C1orf181  | NM_017953.2    | 54680  | 1.0317 | 1.8514 | 2.8317 | 1.905 |
| ILMN_1718629 | NRIP1     | NM_003489.2    | 8204   | 1.5734 | 2.4239 | 1.7126 | 1.903 |
| ILMN_1696767 | C13orf21  | NM_001010897.1 | 387923 | 2.2602 | 2.1878 | 1.2549 | 1.901 |
| ILMN_1797531 | PRKAG2    | NM_024429.1    | 51422  | 1.3702 | 2.5435 | 1.7617 | 1.892 |
| ILMN_2166384 | RANBP5    | NM_002271.4    | 3843   | 1.089  | 2.3402 | 2.2454 | 1.892 |
| ILMN_1666384 | LOC151579 | XM_045290.6    | 151579 | 1.937  | 1.8819 | 1.8504 | 1.890 |
| ILMN_2351611 | UBQLN1    | NM_053067.1    | 29979  | 1.1733 | 2.296  | 2.1978 | 1.889 |
| ILMN_1657683 | C1orf198  | NM_032800.1    | 84886  | 1.8595 | 2.0516 | 1.7486 | 1.887 |
| ILMN_1797964 | ARL6IP6   | NM_152522.3    | 151188 | 1.1988 | 1.6397 | 2.8172 | 1.885 |
| ILMN_1784110 | PCTK3     | NM_212503.1    | 5129   | 2.5415 | 1.8562 | 1.2497 | 1.882 |
| ILMN_2399893 | RPS24     | NM_001026.3    | 6229   | 2.5605 | 1.3514 | 1.7348 | 1.882 |
| ILMN_1797776 | PRSS23    | NM_007173.4    | 11098  | 1.7089 | 1.6398 | 2.297  | 1.882 |

|              |          |                |        |        |        |        |       |
|--------------|----------|----------------|--------|--------|--------|--------|-------|
| ILMN_2072140 | BTF3L4   | NM_152265.1    | 91408  | 1.3933 | 2.1232 | 2.1286 | 1.882 |
| ILMN_1714364 | PTK2     | NM_005607.3    | 5747   | 2.5776 | 1.4327 | 1.6324 | 1.881 |
| ILMN_1693014 | CEBPB    | NM_005194.2    | 1051   | 1.3318 | 1.8123 | 2.4884 | 1.878 |
| ILMN_2334760 | ARMCX3   | NM_177947.2    | 51566  | 1.4273 | 2.3715 | 1.8269 | 1.875 |
| ILMN_1788462 | AMD1     | NM_001033059.1 | 262    | 1.4449 | 1.7847 | 2.3934 | 1.874 |
| ILMN_1718833 | UGT2B7   | XM_943434.1    | 7364   | 1.6738 | 2.0312 | 1.9133 | 1.873 |
| ILMN_1712305 | CYBRD1   | NM_024843.2    | 79901  | 1.7186 | 1.499  | 2.3968 | 1.871 |
| ILMN_1785272 | COL1A2   | NM_000089.3    | 1278   | 1.9384 | 1.276  | 2.3928 | 1.869 |
| ILMN_1782551 | E2F5     | NM_001951.3    | 1875   | 1.4616 | 2.8139 | 1.3313 | 1.869 |
| ILMN_1699665 | CLIC6    | NM_053277.1    | 54102  | 2.4325 | 1.3756 | 1.7904 | 1.866 |
| ILMN_1730223 | RNF39    | NM_170769.1    | 80352  | 2.5166 | 1.9446 | 1.1313 | 1.864 |
| ILMN_2307861 | COL6A3   | NM_004369.2    | 1293   | 1.1168 | 2.3012 | 2.1674 | 1.862 |
| ILMN_1786065 | UHRF1    | NM_001048201.1 | 29128  | 2.3197 | 1.2326 | 2.0173 | 1.857 |
| ILMN_2363586 | SDCBP    | NM_001007067.1 | 6386   | 1.3457 | 1.9382 | 2.2824 | 1.855 |
| ILMN_2179778 | PHLDB2   | NM_145753.1    | 90102  | 1.7645 | 1.8172 | 1.9827 | 1.855 |
| ILMN_1765558 | NPAS2    | NM_002518.3    | 4862   | 1.6307 | 1.611  | 2.3132 | 1.852 |
| ILMN_1690754 | SVIL     | NM_003174.3    | 6840   | 1.0136 | 2.2544 | 2.2869 | 1.852 |
| ILMN_2383707 | ALDH1A2  | NM_170696.1    | 8854   | 1.7899 | 2.1977 | 1.5598 | 1.849 |
| ILMN_1722089 | IBRDC1   | NM_152553.2    | 154214 | 1.6704 | 2.0589 | 1.8172 | 1.849 |
| ILMN_1730433 | CD2AP    | NM_012120.2    | 23607  | 1.8717 | 1.9769 | 1.6862 | 1.845 |
| ILMN_2338268 | ABHD11   | NM_148916.2    | 83451  | 1.8043 | 2.2322 | 1.4964 | 1.844 |
| ILMN_2043079 | ILDR1    | NM_175924.2    | 286676 | 2.2327 | 1.6568 | 1.6426 | 1.844 |
| ILMN_1771627 | ZMIZ1    | NM_020338.2    | 57178  | 1.297  | 1.9187 | 2.3142 | 1.843 |
| ILMN_2193706 | HRK      | NM_003806.1    | 8739   | 3.0125 | 1.3417 | 1.1734 | 1.843 |
| ILMN_2194009 | ABCC4    | NM_005845.2    | 10257  | 2.1725 | 1.7162 | 1.6364 | 1.842 |
| ILMN_1680132 | CADM1    | NM_014333.3    | 23705  | 2.1631 | 2.1074 | 1.2478 | 1.839 |
| ILMN_1679133 | SERPINB1 | NM_030666.2    | 1992   | 1.3118 | 2.4755 | 1.7284 | 1.839 |
| ILMN_1730612 | DBNDD2   | NM_001048223.1 | 55861  | 1.4394 | 1.6863 | 2.3829 | 1.836 |
| ILMN_1802888 | ZNF185   | NM_007150.2    | 7739   | 2.2097 | 1.0442 | 2.2542 | 1.836 |
| ILMN_1651513 | SKIV2L2  | NM_015360.3    | 23517  | 1.0542 | 3.1009 | 1.3448 | 1.833 |
| ILMN_1747162 | DDX47    | NM_016355.3    | 51202  | 1.489  | 1.5727 | 2.4291 | 1.830 |
| ILMN_1670145 | DFNA5    | NM_004403.2    | 1687   | 1.4015 | 2.3613 | 1.7268 | 1.830 |
| ILMN_1692177 | TSC2D1   | NM_006022.2    | 8848   | 2.4628 | 1.4177 | 1.6091 | 1.830 |
| ILMN_2302118 | CCDC50   | NM_174908.2    | 152137 | 1.9479 | 2.0347 | 1.4887 | 1.824 |
| ILMN_1770338 | TM4SF1   | NM_014220.2    | 4071   | 1.1936 | 1.0619 | 3.212  | 1.823 |
| ILMN_1769876 | TBC1D2   | NM_018421.2    | 55357  | 1.9499 | 1.8333 | 1.678  | 1.820 |
| ILMN_1718769 | ITSN1    | NM_001001132.1 | 6453   | 1.7843 | 1.0928 | 2.5821 | 1.820 |
| ILMN_2406501 | SOD2     | NM_001024466.1 | 6648   | 2.1626 | 1.1365 | 2.1557 | 1.818 |
| ILMN_1768582 | PPP2CB   | NM_004156.2    | 5516   | 1.574  | 2.0699 | 1.799  | 1.814 |
| ILMN_1666156 | MORF4L2  | NM_012286.1    | 9643   | 1.5811 | 2.1342 | 1.7269 | 1.814 |
| ILMN_1706118 | HN1L     | NM_144570.2    | 90861  | 1.6573 | 1.8643 | 1.9203 | 1.814 |
| ILMN_1655930 | ELL2     | NM_012081.4    | 22936  | 1.1212 | 1.4399 | 2.8742 | 1.812 |
| ILMN_1804854 | CTNNA1   | NM_001903.2    | 1495   | 1.8217 | 1.9489 | 1.6623 | 1.811 |
| ILMN_1761721 | VPS35    | NM_018206.3    | 55737  | 1.6167 | 1.9961 | 1.8181 | 1.810 |
| ILMN_1702322 | ALS2CL   | NM_147129.2    | 259173 | 1.2991 | 2.1208 | 2.0086 | 1.810 |
| ILMN_1753525 | TCEAL7   | NM_152278.2    | 56849  | 1.3554 | 2.0629 | 2.0085 | 1.809 |
| ILMN_2304186 | MITF     | NM_198158.1    | 4286   | 1.8633 | 1.6399 | 1.9227 | 1.809 |
| ILMN_1744963 | ERO1L    | NM_014584.1    | 30001  | 1.2096 | 2.4621 | 1.7533 | 1.808 |
| ILMN_2340935 | WBP5     | NM_001006614.1 | 51186  | 1.2055 | 2.5561 | 1.6594 | 1.807 |
| ILMN_1815345 | E1F3J    | NM_003758.2    | 8669   | 1.3687 | 2.0654 | 1.9861 | 1.807 |
| ILMN_2094360 | NR2F2    | NM_021005.2    | 7026   | 2.127  | 1.3715 | 1.9206 | 1.806 |
| ILMN_1758164 | STC1     | NM_003155.2    | 6781   | 1.2674 | 1.753  | 2.385  | 1.802 |
| ILMN_1730995 | AFAP1L2  | NM_001001936.1 | 84632  | 1.4097 | 2.1417 | 1.8525 | 1.801 |
| ILMN_2367010 | GPR126   | NM_001032394.1 | 57211  | 1.8516 | 1.8358 | 1.714  | 1.800 |
| ILMN_2159384 | SBDSP    | NR_001588.1    | 155370 | 1.1526 | 2.2231 | 2.0253 | 1.800 |
| ILMN_1700384 | KIAA1522 | NM_020888.2    | 57648  | 2.6612 | 1.7382 | 1.0015 | 1.800 |
| ILMN_1750145 | YWHAG    | NM_012479.2    | 7532   | 1.7369 | 1.8714 | 1.7876 | 1.799 |
| ILMN_1679382 | CCT2     | NM_006431.2    | 10576  | 1.5633 | 1.73   | 2.1005 | 1.798 |
| ILMN_1772466 | SH2D3A   | NM_005490.1    | 10045  | 1.0079 | 2.588  | 1.7969 | 1.798 |
| ILMN_1800512 | HMOX1    | NM_002133.1    | 3162   | 1.2991 | 1.3555 | 2.738  | 1.798 |
| ILMN_2327860 | MAL      | NM_022440.1    | 4118   | 2.5517 | 1.2585 | 1.5769 | 1.796 |
| ILMN_1671891 | FLJ20701 | NM_017933.3    | 55022  | 1.5432 | 1.7162 | 2.126  | 1.795 |
| ILMN_1765858 | CAB39    | NM_016289.2    | 51719  | 1.1429 | 2.0304 | 2.2121 | 1.795 |
| ILMN_2382121 | OCLN     | NM_001587.3    | 4952   | 1.2672 | 2.1075 | 2.0086 | 1.794 |
| ILMN_1790909 | NFE2L2   | NM_006164.2    | 4780   | 1.0025 | 1.9575 | 2.4158 | 1.792 |
| ILMN_1791478 | MTPN     | NM_145808.2    | 136319 | 1.4641 | 2.8016 | 1.1016 | 1.789 |
| ILMN_1712659 | PPP2CB   | NM_004156.2    | 5516   | 2.2105 | 1.8607 | 1.2893 | 1.787 |
| ILMN_2146418 | CRIM1    | NM_016441.1    | 51232  | 1.0385 | 2.156  | 2.1597 | 1.785 |
| ILMN_1689989 | CDC42BPB | NM_006035.3    | 9578   | 1.9232 | 2.4285 | 1.001  | 1.784 |
| ILMN_2363591 | SDCBP    | NM_001007067.1 | 6386   | 1.2269 | 1.9465 | 2.1766 | 1.783 |
| ILMN_1787115 | WWTR1    | NM_015472.3    | 25937  | 1.1906 | 2.6319 | 1.5238 | 1.782 |
| ILMN_2169761 | CPNE8    | NM_153634.2    | 144402 | 1.3522 | 2.1321 | 1.8576 | 1.781 |
| ILMN_1809889 | CCDC117  | NM_173510.1    | 150275 | 1.0104 | 3.2109 | 1.1179 | 1.780 |
| ILMN_1674941 | TMEM16F  | NM_001025356.1 | 196527 | 1.6324 | 1.8895 | 1.8152 | 1.779 |
| ILMN_1713636 | S100A6   | NM_014624.3    | 6277   | 1.5577 | 1.7487 | 2.0303 | 1.779 |
| ILMN_2171384 | CXCL5    | NM_002994.3    | 6374   | 1.2787 | 2.3197 | 1.7367 | 1.778 |
| ILMN_2373779 | COPS8    | NM_006710.4    | 10920  | 1.289  | 2.1927 | 1.8525 | 1.778 |
| ILMN_1724658 | BNIP3    | NM_004052.2    | 664    | 1.2621 | 2.0819 | 1.9849 | 1.776 |
| ILMN_1663281 | ZNF702   | NR_003578.1    |        | 2.2108 | 1.5735 | 1.5424 | 1.776 |
| ILMN_1696585 | C20orf42 | NM_017671.4    | 55612  | 1.8525 | 1.7324 | 1.737  | 1.774 |
| ILMN_1685339 | TPM1     | NM_001018008.1 | 7168   | 1.1854 | 2.5451 | 1.591  | 1.774 |
| ILMN_1741133 | NME1     | NM_000269.2    | 4830   | 2.2637 | 1.6051 | 1.4444 | 1.771 |
| ILMN_1785831 | ZDHHHC13 | NM_001001483.1 | 54503  | 1.0138 | 2.1075 | 2.1902 | 1.771 |
| ILMN_1807919 | TNS1     | NM_022648.3    | 7145   | 1.1552 | 1.9838 | 2.1685 | 1.769 |
| ILMN_1756982 | CLIC1    | NM_001288.4    | 1192   | 1.5371 | 2.0299 | 1.7333 | 1.767 |
| ILMN_1719792 | PHLDB2   | NM_145753.1    | 90102  | 2.2754 | 1.6738 | 1.3492 | 1.766 |
| ILMN_1652445 | RAC1     | NM_018890.2    | 5879   | 1.9702 | 1.6499 | 1.6734 | 1.765 |
| ILMN_2150894 | ALDH1B1  | NM_000692.3    | 219    | 1.3626 | 2.3582 | 1.5719 | 1.764 |
| ILMN_1658835 | CAV2     | NM_001233.3    | 858    | 2.6688 | 1.1915 | 1.4234 | 1.761 |
| ILMN_1758750 | EARS2    | NR_003501.1    |        | 1.0548 | 2.2921 | 1.9296 | 1.759 |



|              |           |                |        |        |        |        |       |
|--------------|-----------|----------------|--------|--------|--------|--------|-------|
| ILMN_2405009 | NBL1      | NM_005380.4    | 4681   | 1.187  | 2.332  | 1.7518 | 1.757 |
| ILMN_1696962 | PDZD8     | NM_173791.3    | 118987 | 1.5919 | 2.2338 | 1.4406 | 1.755 |
| ILMN_1676358 | RALB      | NM_002881.2    | 5899   | 1.614  | 1.9788 | 1.6735 | 1.755 |
| ILMN_1806040 | TYMS      | NM_001071.1    | 7298   | 1.3702 | 1.6986 | 2.1971 | 1.755 |
| ILMN_1730491 | FMNL2     | NM_052905.3    | 114793 | 1.8234 | 1.244  | 2.1969 | 1.755 |
| ILMN_2325574 | CASC4     | NM_177974.1    | 113201 | 1.2126 | 2.0199 | 2.0256 | 1.753 |
| ILMN_2045729 | WDR12     | NM_018256.2    | 55759  | 1.1676 | 2.0297 | 2.0518 | 1.750 |
| ILMN_1799104 | SPAG9     | NM_003971.3    | 9043   | 1.4456 | 1.8216 | 1.9748 | 1.747 |
| ILMN_1660691 | RAB31     | NM_006868.2    | 11031  | 1.7718 | 1.1224 | 2.3438 | 1.746 |
| ILMN_1687858 | CALM2     | NM_001743.3    | 805    | 1.4691 | 1.891  | 1.8746 | 1.745 |
| ILMN_1681949 | PDGFRA    | NM_006206.3    | 5156   | 1.4422 | 1.9163 | 1.8755 | 1.745 |
| ILMN_1691476 | MYLK      | NM_053032.2    | 4638   | 1.4923 | 1.8214 | 1.9106 | 1.741 |
| ILMN_1671600 | EPS8L1    | NM_133180.1    | 54869  | 1.2657 | 2.3626 | 1.5926 | 1.740 |
| ILMN_2366634 | PKM2      | NM_182471.1    | 5315   | 1.3239 | 1.7558 | 2.1387 | 1.739 |
| ILMN_1756238 | C6orf128  | NM_145316.2    | 221468 | 1.4157 | 1.6102 | 2.1902 | 1.739 |
| ILMN_1665583 | TUBB      | NM_178014.2    | 203068 | 1.2075 | 1.9119 | 2.0953 | 1.738 |
| ILMN_1847822 | KIAA0368  | NM_001080398.1 | 23392  | 1.1887 | 2.4055 | 1.6175 | 1.737 |
| ILMN_1780036 | WDR1      | NM_005112.4    | 9948   | 1.2111 | 1.8338 | 2.1645 | 1.736 |
| ILMN_1810486 | RAB34     | NM_031934.3    | 83871  | 2.0204 | 1.4767 | 1.7081 | 1.735 |
| ILMN_2374159 | HERPUD1   | NM_001010990.1 | 9709   | 1.3824 | 2.2386 | 1.5795 | 1.734 |
| ILMN_2239774 | FAM83A    | NM_032899.4    | 84985  | 1.8027 | 1.7162 | 1.6809 | 1.733 |
| ILMN_2140974 | TPM4      | NM_003290.1    | 7171   | 1.7083 | 2.4302 | 1.0583 | 1.732 |
| ILMN_1725597 | FXVD4     | NM_173160.2    | 53828  | 1.3128 | 2.8214 | 1.0575 | 1.731 |
| ILMN_1787567 | TSC22D1   | NM_006022.2    | 8848   | 2.6867 | 1.2097 | 1.2904 | 1.729 |
| ILMN_1661809 | PRRG4     | NM_024081.4    | 79056  | 1.3768 | 1.4337 | 2.3761 | 1.729 |
| ILMN_1767324 | EIF4EBP1  | NM_004095.3    | 1978   | 1.1207 | 2.3559 | 1.7092 | 1.729 |
| ILMN_1684385 | COPB2     | NM_004766.1    | 9276   | 1.3394 | 2.3003 | 1.5412 | 1.727 |
| ILMN_2153837 | SCNN1G    | NM_001039.2    | 6340   | 1.0227 | 2.0851 | 2.0694 | 1.726 |
| ILMN_1690484 | KIAA0895  | NM_015314.2    | 23366  | 1.5507 | 1.9266 | 1.6987 | 1.725 |
| ILMN_1783285 | CTPS      | NM_001905.1    | 1503   | 1.5643 | 1.884  | 1.7263 | 1.725 |
| ILMN_1724832 | OVOL2     | NM_021220.2    | 58495  | 2.5797 | 1.1478 | 1.4446 | 1.724 |
| ILMN_1773847 | DYNC1I2   | NM_001378.1    | 1781   | 1.2978 | 1.815  | 2.0593 | 1.724 |
| ILMN_1706960 | KIAA1217  | NM_001098500.1 | 56243  | 1.4737 | 1.8429 | 1.8525 | 1.723 |
| ILMN_1737972 | TSPYL5    | NM_033512.2    | 85453  | 1.9667 | 1.1266 | 2.0699 | 1.721 |
| ILMN_1746561 | BCL2L2    | NM_004050.2    | 599    | 2.0898 | 1.5331 | 1.5396 | 1.721 |
| ILMN_1809099 | IL33      | NM_033439.2    | 90865  | 2.8638 | 1.1213 | 1.1693 | 1.718 |
| ILMN_1654118 | BCL2L1    | NM_138578.1    | 598    | 1.7908 | 1.7526 | 1.6069 | 1.717 |
| ILMN_1727248 | C14orf173 | NM_001031714.3 | 64423  | 1.2808 | 1.402  | 2.4672 | 1.717 |
| ILMN_1703036 | WRNIP1    | NM_020135.2    | 56897  | 1.2026 | 1.6738 | 2.2707 | 1.716 |
| ILMN_1803811 | TRIB1     | NM_025195.2    | 10221  | 1.042  | 1.6816 | 2.4234 | 1.716 |
| ILMN_2128770 | CDR2L     | NM_014603.1    | 30850  | 1.4901 | 1.0812 | 2.5735 | 1.715 |
| ILMN_1745223 | CDC42EP4  | NM_012121.4    | 23580  | 1.8867 | 1.4761 | 1.7792 | 1.714 |
| ILMN_2275248 | ECE2      | NM_014693.2    | 9718   | 1.4446 | 1.6881 | 2.0086 | 1.714 |
| ILMN_1661593 | FAM18B    | NM_016078.4    | 51030  | 1.8405 | 1.2741 | 2.0262 | 1.714 |
| ILMN_2052208 | GADD45A   | NM_001924.2    | 1647   | 1.3947 | 2.2028 | 1.5415 | 1.713 |
| ILMN_2086470 | PDGFRA    | NM_006206.3    | 5156   | 1.5425 | 1.9163 | 1.6753 | 1.711 |
| ILMN_1651262 | HNRPAB    | NM_004499.3    | 3182   | 1.0236 | 2.1143 | 1.9856 | 1.708 |
| ILMN_1803348 | EHBP1     | NM_015252.2    | 23301  | 1.2979 | 2.4972 | 1.3243 | 1.706 |
| ILMN_1815154 | MYH10     | NM_005964.1    | 4628   | 2.5591 | 1.3478 | 1.212  | 1.706 |
| ILMN_2175112 | KCNS3     | NM_002252.3    | 3790   | 1.7541 | 1.737  | 1.6227 | 1.705 |
| ILMN_1777721 | MAPRE1    | NM_012325.1    | 22919  | 1.1067 | 2.3978 | 1.6029 | 1.702 |
| ILMN_1659923 | GNAQ      | NM_002072.2    | 2776   | 1.2707 | 2.0644 | 1.7676 | 1.701 |
| ILMN_2304624 | EIF4H     | NM_022170.1    | 7458   | 1.425  | 1.9562 | 1.7188 | 1.700 |
| ILMN_1659766 | BAG3      | NM_004281.3    | 9531   | 1.0973 | 1.7548 | 2.2417 | 1.698 |
| ILMN_2225608 | KIAA1411  | NM_020819.2    | 57579  | 1.5178 | 1.542  | 2.0322 | 1.697 |
| ILMN_1753101 | VTCN1     | NM_024626.2    | 79679  | 1.5066 | 1.5072 | 2.0726 | 1.695 |
| ILMN_1679880 | THOC6     | NM_024339.2    | 79228  | 1.2865 | 2.2893 | 1.5088 | 1.695 |
| ILMN_2394571 | FBXW11    | NM_033645.2    | 23291  | 1.1408 | 2.6835 | 1.2586 | 1.694 |
| ILMN_1761903 | KCNS1     | NM_002251.3    | 3787   | 1.4822 | 1.683  | 1.9084 | 1.691 |
| ILMN_1672589 | SEMA4B    | NM_198925.1    | 10509  | 2.2995 | 1.7243 | 1.0482 | 1.691 |
| ILMN_2366864 | JUP       | NM_021991.1    | 3728   | 1.0942 | 1.9296 | 2.0451 | 1.690 |
| ILMN_1673548 | HSPC159   | NM_014181.1    | 29094  | 1.0143 | 1.973  | 2.0775 | 1.688 |
| ILMN_1805999 | MYO1D     | NM_015194.1    | 4642   | 1.0644 | 2.6987 | 1.2933 | 1.685 |
| ILMN_1772316 | UNC84A    | NM_025154.3    | 23353  | 1.4312 | 1.3103 | 2.3133 | 1.685 |
| ILMN_2330307 | SLC43A3   | NM_017611.2    | 29015  | 1.1942 | 1.5585 | 2.297  | 1.683 |
| ILMN_1669631 | GLRB      | NM_000824.2    | 2743   | 1.8525 | 1.8461 | 1.3492 | 1.683 |
| ILMN_2108735 | EEF1A2    | NM_001958.2    | 1917   | 1.0788 | 2.2439 | 1.7225 | 1.682 |
| ILMN_1776925 | PRSS22    | NM_022119.3    | 64063  | 1.8106 | 1.737  | 1.4944 | 1.681 |
| ILMN_1722025 | CPEB4     | NM_030627.1    | 80315  | 1.0558 | 1.5888 | 2.3956 | 1.680 |
| ILMN_1760676 | MORF4L1   | NM_206839.1    | 10933  | 1.8337 | 2.0912 | 1.112  | 1.679 |
| ILMN_1759359 | BTF3L4    | NM_152265.2    | 91408  | 1.5261 | 2.0145 | 1.4918 | 1.677 |
| ILMN_1657949 | RHEB      | NM_005614.3    | 6009   | 1.6893 | 1.8502 | 1.4927 | 1.677 |
| ILMN_1795228 | ZFAND5    | NM_006007.1    | 7763   | 1.0425 | 1.9756 | 2.0132 | 1.677 |
| ILMN_2112417 | PGAM1     | NM_002629.2    | 5223   | 1.0299 | 2.4888 | 1.5122 | 1.677 |
| ILMN_2082585 | SNAI2     | NM_003068.3    | 6591   | 1.4079 | 2.0834 | 1.5345 | 1.675 |
| ILMN_2375879 | VEGFA     | NM_003376.4    | 7422   | 1.3947 | 1.3125 | 2.3119 | 1.673 |
| ILMN_1793543 | C1orf51   | NM_144697.2    | 148523 | 1.0587 | 2.2456 | 1.7116 | 1.672 |
| ILMN_1696187 | PYGL      | NM_002863.3    | 5836   | 1.3544 | 1.0608 | 2.5979 | 1.671 |
| ILMN_1704876 | USP38     | NM_032557.4    | 84640  | 1.9008 | 1.6437 | 1.4679 | 1.671 |
| ILMN_1659255 | RP2       | NM_006915.1    | 6102   | 1.4242 | 1.9564 | 1.6307 | 1.670 |
| ILMN_2198413 | MYEOV     | NM_138768.2    | 26579  | 1.4321 | 2.0312 | 1.5465 | 1.670 |
| ILMN_1811729 | CBLC      | NM_012116.2    | 23624  | 1.4979 | 1.9045 | 1.6048 | 1.669 |
| ILMN_2333687 | CD59      | NM_203331.1    | 966    | 2.1242 | 1.6096 | 1.2703 | 1.668 |
| ILMN_2094166 | CHMP5     | NM_016410.2    | 51510  | 1.0152 | 1.8828 | 2.0984 | 1.665 |
| ILMN_2132458 | CLDN4     | NM_001305.3    | 1364   | 1.2895 | 1.8172 | 1.8862 | 1.664 |
| ILMN_2323087 | RBPM5     | NM_001008712.1 | 11030  | 2.0646 | 1.1108 | 1.8165 | 1.664 |
| ILMN_1716264 | ANKRD1    | NM_014391.2    | 27063  | 1.6157 | 1.5447 | 1.8118 | 1.657 |
| ILMN_1701789 | IFIT3     | NM_001031683.1 | 3437   | 1.8455 | 1.3823 | 1.742  | 1.657 |
| ILMN_1708130 | EHF       | NM_012153.3    | 26298  | 1.3759 | 2.175  | 1.4064 | 1.652 |
| ILMN_1666022 | TNFRSF10D | NM_003840.3    | 8793   | 1.049  | 1.9535 | 1.9446 | 1.649 |

|              |           |                |        |        |        |        |       |
|--------------|-----------|----------------|--------|--------|--------|--------|-------|
| ILMN_1808404 | RHBD1     | NM_022450.2    | 64285  | 1.9098 | 1.642  | 1.3917 | 1.648 |
| ILMN_2387919 | PRKAG2    | NM_001040633.1 | 51422  | 1.3229 | 1.5065 | 2.1134 | 1.648 |
| ILMN_2251766 | IL1R2     | NM_173343.1    | 7850   | 1.4209 | 1.5735 | 1.9446 | 1.646 |
| ILMN_1751328 | FAM83H    | NM_198488.2    | 286077 | 2.407  | 1.4162 | 1.1099 | 1.644 |
| ILMN_1773470 | ST5       | NM_213618.1    | 6764   | 1.7392 | 1.6881 | 1.5031 | 1.643 |
| ILMN_1685824 | B4GALT5   | NM_004776.2    | 9334   | 1.8988 | 1.6212 | 1.4059 | 1.642 |
| ILMN_1657483 | SEC23B    | NM_032985.4    | 10483  | 1.3229 | 2.1062 | 1.4845 | 1.638 |
| ILMN_2387865 | KCNIP4    | NM_001035004.1 | 80333  | 1.4944 | 2.1102 | 1.3014 | 1.635 |
| ILMN_1778236 | PTPN11    | NM_002834.3    | 5781   | 1.374  | 1.8225 | 1.7024 | 1.633 |
| ILMN_1741148 | ALDOA     | NM_184043.1    | 226    | 1.2426 | 1.9947 | 1.6584 | 1.632 |
| ILMN_1763433 | TRIM9     | NM_015163.4    | 114088 | 1.8204 | 1.7709 | 1.3035 | 1.632 |
| ILMN_1756439 | SCRN1     | NM_014766.3    | 9805   | 1.692  | 1.6745 | 1.5222 | 1.630 |
| ILMN_1659544 | STX3      | NM_004177.3    | 6809   | 2.0136 | 1.4196 | 1.4546 | 1.629 |
| ILMN_1672486 | TCF7L2    | NM_030756.2    | 6934   | 1.6733 | 1.6029 | 1.607  | 1.628 |
| ILMN_1736940 | HPRT1     | NM_000194.1    | 3251   | 1.248  | 1.3022 | 2.3322 | 1.627 |
| ILMN_1741176 | CHMP2B    | NM_014043.2    | 25978  | 1.3847 | 2.3273 | 1.1645 | 1.626 |
| ILMN_2072622 | FLJ12684  | NM_024534.4    | 79584  | 1.7438 | 1.5186 | 1.6115 | 1.625 |
| ILMN_2171295 | PFTK1     | NM_012395.2    | 5218   | 1.4737 | 1.3903 | 2.0086 | 1.624 |
| ILMN_1750409 | RAB9A     | NM_004251.3    | 9367   | 1.151  | 1.9953 | 1.724  | 1.623 |
| ILMN_1717706 | PLK2      | NM_006622.2    | 10769  | 1.5813 | 2.0589 | 1.2224 | 1.621 |
| ILMN_1815723 | NUP35     | NM_138285.3    | 129401 | 1.2262 | 1.8461 | 1.7876 | 1.620 |
| ILMN_1733680 | AZI2      | NM_022461.2    | 64343  | 1.0875 | 2.0304 | 1.737  | 1.618 |
| ILMN_1753342 | SAT1      | NM_002970.1    | 6303   | 1.0852 | 1.8017 | 1.9631 | 1.617 |
| ILMN_1722294 | CPNE8     | NM_153634.2    | 144402 | 1.5782 | 1.5067 | 1.7629 | 1.616 |
| ILMN_1713688 | DHX32     | NM_018180.2    | 55760  | 1.6543 | 1.9751 | 1.2167 | 1.615 |
| ILMN_1797604 | CAP1      | NM_006367.2    | 10487  | 1.0308 | 1.941  | 1.8663 | 1.613 |
| ILMN_1688722 | IL13RA2   | NM_000640.2    | 3598   | 1.423  | 1.8333 | 1.5812 | 1.613 |
| ILMN_1670379 | ANTXR1    | NM_032208.1    | 84168  | 2.1605 | 1.3146 | 1.3616 | 1.612 |
| ILMN_2056479 | TXNL2     | NM_006541.2    | 10539  | 2.0302 | 1.195  | 1.6099 | 1.612 |
| ILMN_1677402 | LOC387763 | XM_941665.2    | 387763 | 1.5357 | 1.058  | 2.2404 | 1.611 |
| ILMN_2065690 | GRAMD3    | NM_023927.1    | 65983  | 2.2623 | 1.5393 | 1.0303 | 1.611 |
| ILMN_2408430 | LARGE     | NM_133642.2    | 9215   | 1.7232 | 1.7162 | 1.3891 | 1.610 |
| ILMN_2361478 | PDLIM5    | NM_001011516.1 | 10611  | 1.3405 | 1.5953 | 1.8889 | 1.608 |
| ILMN_1692198 | LOC641765 | XM_935531.1    | 641765 | 1.3426 | 2.0451 | 1.4364 | 1.608 |
| ILMN_1783276 | NEXN      | NM_144573.3    | 91624  | 1.5134 | 1.6612 | 1.6411 | 1.605 |
| ILMN_2352921 | BPGM      | NM_001724.3    | 669    | 1.1633 | 2.2043 | 1.4426 | 1.603 |
| ILMN_1690826 | TNKS1BP1  | NM_033396.2    | 85456  | 1.4092 | 1.5877 | 1.8129 | 1.603 |
| ILMN_2396287 | RFX2      | NM_134433.1    | 5990   | 1.0353 | 2.1417 | 1.6301 | 1.602 |
| ILMN_2311796 | TES       | NM_152829.1    | 26136  | 1.4478 | 1.9594 | 1.3891 | 1.599 |
| ILMN_2132599 | ANKRD22   | NM_144590.1    | 118932 | 1.5266 | 1.1415 | 2.1257 | 1.598 |
| ILMN_1702541 | CCDC55    | NM_032141.2    | 84081  | 1.083  | 2.0834 | 1.6215 | 1.596 |
| ILMN_1751492 | FAM18B    | NM_016078.4    | 51030  | 1.1658 | 1.7882 | 1.8296 | 1.595 |
| ILMN_2366445 | LOC144501 | NM_182507.1    | 144501 | 1.7776 | 1.4504 | 1.5548 | 1.594 |
| ILMN_2175601 | VDAC1     | NM_003374.1    | 7416   | 1.2383 | 1.633  | 1.9113 | 1.594 |
| ILMN_2365569 | ICA1      | NM_004968.2    | 3382   | 1.3812 | 1.845  | 1.5543 | 1.594 |
| ILMN_1716057 | CAPN2     | NM_001748.3    | 824    | 1.2685 | 2.4604 | 1.0511 | 1.593 |
| ILMN_1768662 | UCK2      | NM_012474.3    | 7371   | 1.1016 | 1.7542 | 1.9233 | 1.593 |
| ILMN_1692754 | TMEM49    | NM_030938.2    | 81671  | 1.173  | 1.6301 | 1.9717 | 1.592 |
| ILMN_2346727 | MTUS1     | NM_001001924.1 | 57509  | 1.6781 | 1.3596 | 1.7147 | 1.584 |
| ILMN_1688698 | ZFH1B     | NM_014795.2    | 9839   | 1.1983 | 1.912  | 1.6398 | 1.583 |
| ILMN_1679209 | HSPA9     | NM_004134.4    | 3313   | 1.3204 | 2.0658 | 1.3637 | 1.583 |
| ILMN_1716608 | NGFB      | NM_002506.2    | 4803   | 1.5371 | 1.8172 | 1.3953 | 1.583 |
| ILMN_2366246 | SEC23B    | NM_032985.4    | 10483  | 1.4475 | 1.4497 | 1.8506 | 1.583 |
| ILMN_1679460 | PPFIBP1   | NM_003622.2    | 8496   | 1.311  | 1.5225 | 1.9127 | 1.582 |
| ILMN_1806387 | LOC340598 | XM_926996.1    | 340598 | 1.6809 | 1.1399 | 1.9212 | 1.581 |
| ILMN_2148469 | RASL11B   | NM_023940.2    | 65997  | 1.0376 | 2.4511 | 1.2521 | 1.580 |
| ILMN_2327090 | MAEA      | NM_005882.3    | 10296  | 1.6268 | 1.1512 | 1.9612 | 1.580 |
| ILMN_2228809 | YWHAG     | NM_012479.2    | 7532   | 1.3651 | 2.0478 | 1.3232 | 1.579 |
| ILMN_1746359 | RERG      | NM_032918.1    | 85004  | 1.3081 | 2.3447 | 1.0823 | 1.578 |
| ILMN_1783120 | SLMAP     | NM_007159.2    | 7871   | 1.5859 | 1.7614 | 1.3855 | 1.578 |
| ILMN_1728478 | CXCL16    | NM_022059.1    | 58191  | 1.3325 | 1.6509 | 1.7455 | 1.576 |
| ILMN_1747771 | LOC730744 | XM_001129080.1 | 730744 | 1.2767 | 1.6964 | 1.7543 | 1.576 |
| ILMN_1782439 | CNN3      | NM_001839.2    | 1266   | 2.2963 | 1.2625 | 1.1648 | 1.575 |
| ILMN_1751615 | COQ10B    | NM_025147.3    | 80219  | 1.0236 | 2.6138 | 1.0838 | 1.574 |
| ILMN_2387471 | FLJ22184  | NM_001080403.1 | 80164  | 1.2796 | 1.6371 | 1.8038 | 1.574 |
| ILMN_1706498 | DSE       | NM_013352.2    | 29940  | 1.7921 | 1.4504 | 1.4749 | 1.572 |
| ILMN_1734316 | YME1L1    | NM_139312.1    | 10730  | 1.0323 | 1.389  | 2.2959 | 1.572 |
| ILMN_1663313 | AMY1C     | NM_001008219.1 | 278    | 1.3421 | 1.8075 | 1.5669 | 1.572 |
| ILMN_1798372 | ANXA2P3   | NR_001446.2    |        | 1.7157 | 1.6838 | 1.3055 | 1.568 |
| ILMN_2367020 | SEC61G    | NM_014302.3    | 23480  | 1.1193 | 2.0538 | 1.5195 | 1.564 |
| ILMN_1692545 | LOC646849 | XM_933970.1    | 646849 | 1.0596 | 2.2156 | 1.4167 | 1.564 |
| ILMN_1738558 | RGS20     | NM_170587.1    | 8601   | 1.2137 | 1.7404 | 1.737  | 1.564 |
| ILMN_1717877 | IVNS1ABP  | NM_006469.4    | 10625  | 1.265  | 1.8316 | 1.5882 | 1.562 |
| ILMN_1660021 | M6PRBP1   | NM_005817.3    | 10226  | 1.3197 | 1.6976 | 1.6613 | 1.560 |
| ILMN_2080684 | IQCA      | NM_024726.3    | 79781  | 1.0318 | 2.152  | 1.4822 | 1.555 |
| ILMN_1696028 | ETNK1     | NM_018638.4    | 55500  | 1.1966 | 1.8745 | 1.5926 | 1.555 |
| ILMN_1654016 | MRLC2     | NM_033546.2    | 103910 | 1.3763 | 1.6846 | 1.5987 | 1.553 |
| ILMN_1794598 | SCHIP1    | NM_014575.2    | 29970  | 1.6534 | 1.1789 | 1.8178 | 1.550 |
| ILMN_2123665 | SBF2      | NM_030962.2    | 81846  | 1.2472 | 1.6644 | 1.7218 | 1.544 |
| ILMN_1708223 | PAK6      | NM_020168.3    | 56924  | 1.8139 | 1.6411 | 1.1776 | 1.544 |
| ILMN_2053178 | ACTG1     | NM_001614.2    | 71     | 1.1441 | 1.85   | 1.6385 | 1.544 |
| ILMN_1760855 | OCLR      | NM_000276.3    | 4952   | 1.2987 | 1.7439 | 1.5896 | 1.544 |
| ILMN_1704305 | NIP7      | NM_016101.3    | 51388  | 1.0685 | 1.9183 | 1.6399 | 1.542 |
| ILMN_1730487 | CALD1     | NM_033140.2    | 800    | 2.2179 | 1.2472 | 1.1611 | 1.542 |
| ILMN_1708025 | RBPM5     | NM_006867.2    | 11030  | 1.5415 | 1.2259 | 1.8525 | 1.540 |
| ILMN_1663032 | FNDC4     | NM_022823.1    | 64838  | 1.5463 | 1.5541 | 1.5186 | 1.540 |
| ILMN_2056975 | HPRT1     | NM_000194.1    | 3251   | 1.1344 | 2.0151 | 1.469  | 1.540 |
| ILMN_1764201 | MAP2      | NM_031845.2    | 4133   | 1.5231 | 1.3596 | 1.7347 | 1.539 |
| ILMN_1775829 | PERP      | NM_022121.2    | 64065  | 2.0562 | 1.1018 | 1.4584 | 1.539 |
| ILMN_1660067 | LOC728285 | XM_001127070.1 | 728285 | 1.4064 | 1.5708 | 1.6384 | 1.539 |

|              |           |                |        |        |        |        |       |
|--------------|-----------|----------------|--------|--------|--------|--------|-------|
| ILMN_1721316 | TNFRSF10A | NM_003844.2    | 8797   | 1.2193 | 1.9248 | 1.4636 | 1.536 |
| ILMN_1754969 | LMCD1     | NM_014583.2    | 29995  | 1.2442 | 1.282  | 2.0785 | 1.535 |
| ILMN_2404917 | AFAP1L2   | NM_032550.2    | 84632  | 1.7958 | 1.4584 | 1.3492 | 1.534 |
| ILMN_2126832 | SEC24A    | NM_021982.1    | 10802  | 1.1002 | 1.5849 | 1.9147 | 1.533 |
| ILMN_2388484 | MAP2      | NM_002374.3    | 4133   | 1.5384 | 1.4839 | 1.5735 | 1.532 |
| ILMN_1812474 | TFG       | NM_001007565.1 | 10342  | 1.3248 | 1.5145 | 1.7553 | 1.532 |
| ILMN_1676629 | INSIG2    | NM_016133.2    | 51141  | 1.5206 | 1.6547 | 1.3916 | 1.522 |
| ILMN_1780255 | KLK6      | NM_001012964.1 | 5653   | 1.2467 | 1.6521 | 1.6653 | 1.521 |
| ILMN_1724139 | TMEM123   | NM_052932.2    | 114908 | 1.1223 | 1.9589 | 1.4776 | 1.520 |
| ILMN_1810559 | RHOQ      | NM_012249.3    | 23433  | 1.3328 | 1.5162 | 1.7097 | 1.520 |
| ILMN_1791726 | TUBB3     | NM_006086.2    | 10381  | 1.0292 | 1.7347 | 1.7909 | 1.518 |
| ILMN_1761858 | MID1      | NM_033290.2    | 4281   | 1.5524 | 1.8761 | 1.1259 | 1.518 |
| ILMN_1752810 | LARP6     | NM_018357.2    | 55323  | 1.887  | 1.4345 | 1.2084 | 1.510 |
| ILMN_1701482 | POFUT2    | NM_015227.4    | 23275  | 1.2869 | 2.2201 | 1.0209 | 1.509 |
| ILMN_1691506 | NGRN      | NM_016645.2    | 51335  | 1.422  | 1.1692 | 1.9323 | 1.508 |
| ILMN_2374687 | PTPN13    | NM_080684.1    | 5783   | 1.0934 | 1.8714 | 1.5541 | 1.506 |
| ILMN_1753279 | HNRPA0    | NM_006805.3    | 10949  | 1.6455 | 1.2424 | 1.6295 | 1.506 |
| ILMN_2179717 | C9orf61   | NM_004816.2    | 9413   | 1.7713 | 1.0902 | 1.6521 | 1.505 |
| ILMN_1706426 | DSTN      | NM_001011546.1 | 11034  | 2.3903 | 1.0842 | 1.03   | 1.502 |
| ILMN_1746664 | WSB2      | NM_018639.3    | 55884  | 1.4086 | 2.0834 | 1.0111 | 1.501 |
| ILMN_2324157 | UBE1C     | NM_198195.1    | 9039   | 1.0347 | 1.8025 | 1.6624 | 1.500 |
| ILMN_2222991 | ETF1      | NM_004730.1    | 2107   | 1.1323 | 1.8381 | 1.5231 | 1.498 |
| ILMN_2063168 | MALL      | NM_005434.3    | 7851   | 1.7174 | 1.4529 | 1.3138 | 1.495 |
| ILMN_1664756 | KPNA4     | NM_002268.3    | 3840   | 1.3063 | 1.6203 | 1.5567 | 1.494 |
| ILMN_1712950 | PFN1      | NM_005022.2    | 5216   | 1.1111 | 1.809  | 1.5622 | 1.494 |
| ILMN_1752046 | SH2B3     | NM_005475.1    | 10019  | 1.0282 | 1.3226 | 2.1244 | 1.492 |
| ILMN_1666004 | WASL      | NM_003941.2    | 8976   | 1.3635 | 1.7238 | 1.3828 | 1.490 |
| ILMN_2080158 | FAM10A7   | NR_002198.2    | 155019 | 1.0683 | 1.8172 | 1.5735 | 1.486 |
| ILMN_1660847 | PKFB3     | NM_004566.2    | 5209   | 1.0878 | 1.4392 | 1.9244 | 1.484 |
| ILMN_1678928 | SLCO3A1   | NM_013272.2    | 28232  | 1.2388 | 1.5384 | 1.6702 | 1.482 |
| ILMN_2399622 | AP1G1     | NM_001128.5    | 164    | 1.106  | 1.1006 | 2.2215 | 1.476 |
| ILMN_1750181 | TESC      | NM_017899.2    | 54997  | 1.0599 | 2.0881 | 1.2673 | 1.472 |
| ILMN_1688127 | LOC341457 | XM_292085.2    | 341457 | 1.3767 | 1.2589 | 1.7679 | 1.468 |
| ILMN_1705032 | SEH1L     | NM_031216.3    | 81929  | 1.0344 | 1.7789 | 1.5814 | 1.465 |
| ILMN_1664167 | BXDC1     | NM_032194.1    | 84154  | 1.0594 | 1.5331 | 1.7986 | 1.464 |
| ILMN_1710408 | LGR4      | NM_018490.1    | 55366  | 1.0617 | 1.4822 | 1.8461 | 1.463 |
| ILMN_1815733 | EIF5      | NM_001969.3    | 1983   | 1.2578 | 1.3837 | 1.7472 | 1.463 |
| ILMN_1737517 | RPL29     | NM_000992.2    | 6159   | 1.7059 | 1.1993 | 1.4829 | 1.463 |
| ILMN_1762883 | ECE2      | NM_032331.3    | 9718   | 1.4882 | 1.1273 | 1.7676 | 1.461 |
| ILMN_1748881 | MRAS      | NM_012219.3    | 22808  | 1.6307 | 1.4822 | 1.2611 | 1.458 |
| ILMN_1757646 | UFM1      | NM_016617.1    | 51569  | 1.2725 | 1.4614 | 1.6379 | 1.457 |
| ILMN_1782389 | LAD1      | NM_005558.3    | 3898   | 2.098  | 1.0328 | 1.2381 | 1.456 |
| ILMN_2196097 | PPP2CA    | NM_002715.2    | 5515   | 1.6016 | 1.5668 | 1.1932 | 1.454 |
| ILMN_1718961 | BNI3P3L   | NM_004331.2    | 665    | 1.3377 | 1.8521 | 1.1715 | 1.454 |
| ILMN_1669268 | MEX3D     | NM_001085363.1 | 399664 | 1.0561 | 1.4824 | 1.8214 | 1.453 |
| ILMN_1703487 | LMO4      | NM_006769.2    | 8543   | 1.5777 | 1.5099 | 1.2677 | 1.452 |
| ILMN_2117987 | TFDP1     | NM_007111.3    | 7027   | 1.3744 | 1.3348 | 1.6403 | 1.450 |
| ILMN_1687501 | MOXD1     | NM_015529.2    | 26002  | 1.1852 | 1.9131 | 1.241  | 1.446 |
| ILMN_1673215 | PCBP1     | NM_006196.2    | 5093   | 1.0859 | 1.8215 | 1.4284 | 1.445 |
| ILMN_1727087 | GJA1      | NM_000165.3    | 2697   | 2.2342 | 1.0068 | 1.0947 | 1.445 |
| ILMN_2325337 | APOL2     | NM_145637.1    | 23780  | 1.1054 | 1.9182 | 1.2895 | 1.438 |
| ILMN_1792660 | CAMSAP1L1 | NM_203459.1    | 23271  | 1.6062 | 1.0182 | 1.6825 | 1.436 |
| ILMN_1750394 | SLC39A6   | NM_012319.3    | 25800  | 1.3277 | 1.2918 | 1.6838 | 1.434 |
| ILMN_1767711 | CASR      | NM_000388.2    | 846    | 1.6987 | 1.5018 | 1.1025 | 1.434 |
| ILMN_1788107 | IL11      | NM_000641.2    | 3589   | 1.078  | 1.4574 | 1.7642 | 1.433 |
| ILMN_1807994 | PCNP      | NM_020357.1    | 57092  | 1.2192 | 1.8502 | 1.2289 | 1.433 |
| ILMN_1786433 | BCCIP     | NM_016567.2    | 56647  | 1.5615 | 1.7141 | 1.0162 | 1.431 |
| ILMN_2222992 | ETF1      | NM_004730.1    | 2107   | 1.0673 | 1.4506 | 1.7683 | 1.429 |
| ILMN_1706021 | TMPRSS4   | NM_019894.2    | 56649  | 1.0423 | 1.3527 | 1.8909 | 1.429 |
| ILMN_1790315 | FLJ21062  | NM_001039706.1 | 79846  | 1.2783 | 1.9446 | 1.0629 | 1.429 |
| ILMN_1665425 | RPRM      | NM_019845.2    | 56475  | 1.2007 | 1.558  | 1.5186 | 1.426 |
| ILMN_2403946 | FEZ2      | NM_005102.1    | 9637   | 1.7131 | 1.5611 | 1.0007 | 1.425 |
| ILMN_1789599 | NBL1      | NM_182744.1    | 4681   | 1.0134 | 1.6946 | 1.5602 | 1.423 |
| ILMN_1765621 | HDGF      | NM_004494.1    | 3068   | 1.1116 | 1.1896 | 1.9584 | 1.420 |
| ILMN_1799848 | ANKRD22   | NM_144590.2    | 118932 | 1.2528 | 1.1365 | 1.8651 | 1.418 |
| ILMN_1777483 | APOOL     | NM_198450.3    | 139322 | 1.0099 | 1.5384 | 1.6987 | 1.416 |
| ILMN_1804929 | OXTR      | NM_000916.3    | 5021   | 1.0418 | 1.0621 | 2.1406 | 1.415 |
| ILMN_1695271 | RPP25     | NM_017793.2    | 54913  | 1.4493 | 1.5384 | 1.2499 | 1.413 |
| ILMN_1765310 | TCEAL2    | NM_080390.3    | 140597 | 1.5312 | 1.1688 | 1.5317 | 1.411 |
| ILMN_1808777 | EHD2      | NM_014601.2    | 30846  | 1.1018 | 1.6056 | 1.5231 | 1.410 |
| ILMN_1690476 | QKI       | NM_006775.1    | 9444   | 1.1605 | 1.5146 | 1.5541 | 1.410 |
| ILMN_2366388 | PRDX1     | NM_181696.1    | 5052   | 1.8484 | 1.2989 | 1.0779 | 1.408 |
| ILMN_2182750 | DDX1      | NM_004939.1    | 1653   | 1.0634 | 1.6344 | 1.5215 | 1.406 |
| ILMN_1745242 | PLSCR1    | NM_021105.1    | 5359   | 1.2237 | 1.7057 | 1.2895 | 1.406 |
| ILMN_1763265 | CHMP1B    | NM_020412.3    | 57132  | 1.0127 | 1.6131 | 1.5862 | 1.404 |
| ILMN_1800225 | PPARG     | NM_015869.4    | 5468   | 1.189  | 1.4534 | 1.5588 | 1.400 |
| ILMN_1657870 | ABL2      | NM_005158.3    | 27     | 1.0795 | 1.3265 | 1.7909 | 1.399 |
| ILMN_1730794 | SERTAD4   | NM_019605.2    | 56256  | 1.6004 | 1.3492 | 1.2467 | 1.399 |
| ILMN_2046470 | DAAM1     | NM_014992.1    | 23002  | 1.2852 | 1.5345 | 1.3759 | 1.399 |
| ILMN_1797009 | F3        | NM_001993.2    | 2152   | 1.1342 | 1.5576 | 1.5006 | 1.397 |
| ILMN_1660111 | UCHL3     | NM_006002.3    | 7347   | 1.6251 | 1.2726 | 1.2831 | 1.394 |
| ILMN_1655316 | PSMC6     | NM_002806.2    | 5706   | 1.4543 | 1.6086 | 1.1139 | 1.392 |
| ILMN_1745820 | RASSF6    | NM_201431.1    | 166824 | 1.5502 | 1.3197 | 1.3016 | 1.391 |
| ILMN_1814327 | AGTR1     | NM_000685.4    | 185    | 1.1725 | 1.9446 | 1.0506 | 1.389 |
| ILMN_1693830 | LACTB     | NM_171846.1    | 114294 | 1.0885 | 1.6521 | 1.4179 | 1.386 |
| ILMN_1659888 | PPP1R14B  | NM_138689.2    | 26472  | 1.1782 | 1.5426 | 1.4339 | 1.385 |
| ILMN_1807169 | TINAGL1   | NM_022164.1    | 64129  | 1.7709 | 1.2655 | 1.1148 | 1.384 |
| ILMN_1760575 | PTPA1     | NM_003463.3    | 7803   | 1.224  | 1.425  | 1.4933 | 1.381 |
| ILMN_2359345 | NET1      | NM_005863.2    | 10276  | 1.0749 | 1.831  | 1.2329 | 1.380 |
| ILMN_1723467 | ITGB1     | NM_002211.2    | 3688   | 1.544  | 1.4124 | 1.1799 | 1.379 |

|              |           |                |        |        |        |        |       |
|--------------|-----------|----------------|--------|--------|--------|--------|-------|
| ILMN_1785900 | LOC653108 | XR_016129.1    | 653108 | 1.6305 | 1.4822 | 1.0189 | 1.377 |
| ILMN_1732468 | HSPA4L    | NM_014278.2    | 22824  | 1.2515 | 1.6077 | 1.2707 | 1.377 |
| ILMN_1791447 | CXCL12    | NM_199168.2    | 6387   | 1.423  | 1.3341 | 1.3419 | 1.366 |
| ILMN_1713143 | MRPL3     | NM_007208.2    | 11222  | 1.3549 | 1.5007 | 1.2427 | 1.366 |
| ILMN_1662905 | NME1-NME2 | NM_001018136.1 | 654364 | 1.4218 | 1.3431 | 1.3247 | 1.363 |
| ILMN_1739238 | L1CAM     | NM_000425.2    | 3897   | 1.0264 | 1.7676 | 1.2917 | 1.362 |
| ILMN_1761946 | PROM2     | NM_144707.1    | 150696 | 1.0078 | 1.1632 | 1.9033 | 1.358 |
| ILMN_2329165 | MYO1C     | NM_001080779.1 | 4641   | 1.3299 | 1.245  | 1.4928 | 1.356 |
| ILMN_1675848 | MRCL3     | NM_006471.2    | 10627  | 1.2759 | 1.4344 | 1.3535 | 1.355 |
| ILMN_2373495 | H2AFY     | NM_004893.2    | 9555   | 1.0831 | 1.3834 | 1.593  | 1.353 |
| ILMN_1674385 | YWHAQ     | NM_006826.2    | 10971  | 1.0155 | 1.3749 | 1.637  | 1.342 |
| ILMN_1805410 | C15orf48  | NM_032413.2    | 84419  | 1.3941 | 1.128  | 1.4954 | 1.339 |
| ILMN_1740426 | RASD1     | NM_016084.3    | 51655  | 1.473  | 1.4136 | 1.1294 | 1.339 |
| ILMN_1810759 | C2orf25   | NM_015702.1    | 27249  | 1.0072 | 1.7544 | 1.2149 | 1.326 |
| ILMN_1738632 | PRKAR1A   | NM_212472.1    | 5573   | 1.1777 | 1.4938 | 1.3035 | 1.325 |
| ILMN_1773741 | GOLGA5    | NM_005113.2    | 9950   | 1.1297 | 1.5869 | 1.2578 | 1.325 |
| ILMN_1805827 | PPA1      | NM_021129.3    | 5464   | 1.5261 | 1.1976 | 1.2476 | 1.324 |
| ILMN_1719664 | PTPN21    | NM_007039.3    | 11099  | 1.126  | 1.367  | 1.4698 | 1.321 |
| ILMN_1667626 | EGLN3     | NM_022073.3    | 112399 | 1.0264 | 1.3934 | 1.5305 | 1.317 |
| ILMN_2112638 | SVEP1     | NM_153366.2    | 79987  | 1.0506 | 1.5873 | 1.3041 | 1.314 |
| ILMN_1785852 | OBFC2A    | NM_001031716.1 | 64859  | 1.0762 | 1.8513 | 1.0125 | 1.313 |
| ILMN_1768575 | SFTPD     | NM_003019.4    | 6441   | 1.6227 | 1.1674 | 1.1493 | 1.313 |
| ILMN_1773485 | QKI       | NM_006775.1    | 9444   | 1.1133 | 1.4574 | 1.3626 | 1.311 |
| ILMN_1793433 | RAB10     | NM_016131.3    | 10890  | 1.1661 | 1.6418 | 1.1157 | 1.308 |
| ILMN_1787680 | SELS      | NM_018445.4    | 55829  | 1.3766 | 1.4128 | 1.1301 | 1.307 |
| ILMN_1768127 | EBNA1BP2  | NM_006824.1    | 10969  | 1.53   | 1.0159 | 1.3732 | 1.306 |
| ILMN_2147306 | PNRC2     | NM_017761.2    | 55629  | 1.1902 | 1.6216 | 1.097  | 1.303 |
| ILMN_1754943 | MYO1E     | NM_004998.2    | 4643   | 1.034  | 1.524  | 1.3378 | 1.299 |
| ILMN_1773413 | DOCK9     | NM_015296.1    | 23348  | 1.1524 | 1.1058 | 1.6227 | 1.294 |
| ILMN_1749243 | BANF1     | NM_003860.2    | 8815   | 1.1414 | 1.3964 | 1.3372 | 1.292 |
| ILMN_1695357 | CCDC99    | NM_017785.3    | 54908  | 1.0565 | 1.3492 | 1.4574 | 1.288 |
| ILMN_1796013 | PYCR1     | NM_153824.1    | 5831   | 1.1831 | 1.5084 | 1.1663 | 1.286 |
| ILMN_1678075 | CDYL      | NM_170751.1    | 9425   | 1.0668 | 1.3492 | 1.4364 | 1.284 |
| ILMN_2343264 | PRDM16    | NM_022114.2    | 63976  | 1.3038 | 1.4509 | 1.0945 | 1.283 |
| ILMN_1792733 | FOXA3     | NM_004497.2    | 3171   | 1.065  | 1.5982 | 1.1793 | 1.281 |
| ILMN_1655051 | FAM86B1   | NM_001083537.1 | 85002  | 1.2572 | 1.4595 | 1.1063 | 1.274 |
| ILMN_1691151 | CHKA      | NM_212469.1    | 1119   | 1.1776 | 1.4138 | 1.2209 | 1.271 |
| ILMN_1773901 | STX12     | NM_177424.2    | 23673  | 1.0545 | 1.7292 | 1.006  | 1.263 |
| ILMN_1757415 | C1orf163  | NM_023077.1    | 65260  | 1.0442 | 1.5084 | 1.2354 | 1.263 |
| ILMN_1743397 | PIGW      | NM_178517.3    | 284098 | 1.6371 | 1.0802 | 1.0682 | 1.262 |
| ILMN_1711542 | CHMP4C    | NM_152284.3    | 92421  | 1.2895 | 1.2419 | 1.2467 | 1.259 |
| ILMN_1774823 | RPL34     | NM_033625.2    | 6164   | 1.4524 | 1.0288 | 1.2906 | 1.257 |
| ILMN_2400250 | FAM86A    | NM_201598.1    | 196483 | 1.3265 | 1.0434 | 1.4009 | 1.257 |
| ILMN_2342033 | F11R      | NM_144504.1    | 50848  | 1.416  | 1.3281 | 1.0182 | 1.254 |
| ILMN_1788149 | NEK11     | NM_024800.3    | 79858  | 1.3603 | 1.3035 | 1.0834 | 1.249 |
| ILMN_1763537 | LCTL      | NM_207338.2    | 197021 | 1.1688 | 1.4108 | 1.1674 | 1.249 |
| ILMN_2051867 | PTCD2     | NM_024754.3    | 79810  | 1.2347 | 1.2741 | 1.2338 | 1.248 |
| ILMN_2347234 | PRMT1     | NM_198318.1    | 3276   | 1.0958 | 1.6362 | 1.0096 | 1.247 |
| ILMN_2341343 | AGTR1     | NM_004835.3    | 185    | 1.0942 | 1.6115 | 1.034  | 1.247 |
| ILMN_2175474 | MTRF1L    | NM_019041.3    | 54516  | 1.0334 | 1.007  | 1.6831 | 1.241 |
| ILMN_1794829 | C6orf117  | NM_138409.1    | 112609 | 1.0506 | 1.4504 | 1.1982 | 1.233 |
| ILMN_1673950 | STBD1     | NM_003943.2    | 8987   | 1.3242 | 1.0677 | 1.2926 | 1.228 |
| ILMN_1715647 | VANGL2    | NM_020335.1    | 57216  | 1.056  | 1.5101 | 1.1114 | 1.226 |
| ILMN_2339825 | YME1L1    | NM_139313.1    | 10730  | 1.0538 | 1.3403 | 1.2692 | 1.221 |
| ILMN_1654696 | C15orf48  | NM_032413.2    | 84419  | 1.3451 | 1.1693 | 1.1214 | 1.212 |
| ILMN_2181445 | BCL2L13   | NM_015367.2    | 23786  | 1.2324 | 1.1391 | 1.2587 | 1.210 |
| ILMN_1799113 | CCDC41    | NM_016122.2    | 51134  | 1.0301 | 1.2895 | 1.3035 | 1.208 |
| ILMN_1810584 | IL1R1     | NM_000877.2    | 3554   | 1.1008 | 1.1365 | 1.3847 | 1.207 |
| ILMN_1772241 | SQLE      | NM_003129.3    | 6713   | 1.2594 | 1.1327 | 1.2224 | 1.205 |
| ILMN_2335718 | HNRPA1    | NM_004499.3    | 3182   | 1.0867 | 1.5012 | 1.0191 | 1.202 |
| ILMN_1756408 | PARVA     | NM_018222.2    | 55742  | 1.3302 | 1.1767 | 1.0955 | 1.201 |
| ILMN_1732398 | SCGB2A1   | NM_002407.1    | 4246   | 1.2918 | 1.1208 | 1.1833 | 1.199 |
| ILMN_1725485 | RGS17     | NM_012419.4    | 26575  | 1.2213 | 1.3413 | 1.0267 | 1.196 |
| ILMN_1727194 | CALU      | NM_001219.2    | 813    | 1.5087 | 1.0566 | 1.0177 | 1.194 |
| ILMN_2401964 | CDC42EP1  | NM_007061.3    | 11135  | 1.0057 | 1.5268 | 1.0487 | 1.194 |
| ILMN_1781672 | GAB1      | NM_207123.1    | 2549   | 1.2659 | 1.1365 | 1.1776 | 1.193 |
| ILMN_2067708 | TFB2M     | NM_022366.1    | 64216  | 1.0958 | 1.4494 | 1.0331 | 1.193 |
| ILMN_2383305 | GPATCH4   | NM_182679.1    | 54865  | 1.349  | 1.0401 | 1.1816 | 1.190 |
| ILMN_2314007 | TCF12     | NM_207037.1    | 6938   | 1.0697 | 1.3339 | 1.1535 | 1.186 |
| ILMN_1774330 | WSCD1     | NM_015253.1    | 23302  | 1.2611 | 1.0227 | 1.2707 | 1.185 |
| ILMN_1777220 | VCP       | NM_007126.2    | 7415   | 1.1041 | 1.1545 | 1.2929 | 1.184 |
| ILMN_1709611 | PSMA1     | NM_148976.1    | 5682   | 1.0247 | 1.3655 | 1.1385 | 1.176 |
| ILMN_1749078 | TIMP2     | NM_003255.4    | 7077   | 1.0981 | 1.056  | 1.3626 | 1.172 |
| ILMN_1752159 | AHNAK     | NM_024060.2    | 79026  | 1.1674 | 1.1831 | 1.1385 | 1.163 |
| ILMN_1779979 | SLC37A3   | NM_207113.1    | 84255  | 1.2132 | 1.0096 | 1.257  | 1.160 |
| ILMN_1803302 | CRK       | NM_016823.2    | 1398   | 1.0716 | 1.1618 | 1.2402 | 1.158 |
| ILMN_1704094 | PSMA6     | NM_002791.1    | 5687   | 1.3208 | 1.0389 | 1.1079 | 1.156 |
| ILMN_1811921 | CSRP1     | NM_004078.1    | 1465   | 1.1272 | 1.1336 | 1.2009 | 1.154 |
| ILMN_1702683 | SLC33A1   | NM_004733.2    | 9197   | 1.1289 | 1.2979 | 1.0345 | 1.154 |
| ILMN_1714709 | OLFM1     | NM_006334.3    | 10439  | 1.1218 | 1.2555 | 1.0506 | 1.143 |
| ILMN_1705346 | NBEA      | NM_015678.3    | 26960  | 1.3492 | 1.0227 | 1.0506 | 1.141 |
| ILMN_2085236 | SNX24     | NM_014035.1    | 28966  | 1.1025 | 1.1429 | 1.1652 | 1.137 |
| ILMN_2407879 | SORBS2    | NM_003603.4    | 8470   | 1.1313 | 1.2175 | 1.0545 | 1.134 |
| ILMN_1669881 | TSPAN13   | NM_014399.3    | 27075  | 1.068  | 1.3035 | 1.0284 | 1.133 |
| ILMN_1773935 | TMEM165   | NM_018475.2    | 55858  | 1.1358 | 1.0194 | 1.2322 | 1.129 |
| ILMN_1729318 | TOR1AIP1  | NM_015602.2    | 26092  | 1.1054 | 1.0553 | 1.2208 | 1.127 |
| ILMN_1764964 | IFNGR2    | NM_005534.2    | 3460   | 1.1626 | 1.1592 | 1.0344 | 1.119 |
| ILMN_2299843 | ATP5S     | NM_015684.2    | 27109  | 1.0729 | 1.0726 | 1.1674 | 1.104 |
| ILMN_1670008 | FLCN      | NM_144997.4    | 201163 | 1.0284 | 1.0395 | 1.2419 | 1.103 |
| ILMN_2140510 | KLHL13    | NM_033495.2    | 90293  | 1.1716 | 1.0158 | 1.1032 | 1.097 |

|              |           |                |        |         |         |         |        |
|--------------|-----------|----------------|--------|---------|---------|---------|--------|
| ILMN_1700546 | ELOVL6    | NM_024090.1    | 79071  | 1.1674  | 1.0674  | 1.0055  | 1.080  |
| ILMN_1809013 | MYL6      | NM_021019.3    | 4637   | 1.0068  | 1.1057  | 1.0462  | 1.053  |
| ILMN_1798546 | HDAC6     | NM_006044.2    | 10013  | -1.034  | -1.2709 | -1.0009 | -1.102 |
| ILMN_1756696 | USF2      | NM_207291.1    | 7392   | -1.1901 | -1.11   | -1.019  | -1.106 |
| ILMN_1746917 | LOC729843 | XR_016056.1    | 729843 | -1.1101 | -1.2293 | -1.1457 | -1.162 |
| ILMN_1797822 | KIAA0746  | NM_015187.3    | 23231  | -1.2127 | -1.3161 | -1.0125 | -1.180 |
| ILMN_1689786 | ASMTL     | NM_004192.1    | 8623   | -1.1337 | -1.4614 | -1.0616 | -1.219 |
| ILMN_1794333 | POU2F1    | NM_002697.2    | 5451   | -1.2163 | -1.2291 | -1.2252 | -1.224 |
| ILMN_1784661 | TMEM2     | NM_013390.1    | 23670  | -1.1187 | -1.3237 | -1.2324 | -1.225 |
| ILMN_1770831 | LOC641978 | XM_935752.1    | 641978 | -1.4266 | -1.1568 | -1.1523 | -1.245 |
| ILMN_2194852 | FLJ46309  | NM_001039797.1 | 649598 | -1.189  | -1.0099 | -1.5396 | -1.246 |
| ILMN_2114422 | NOD1      | NM_006092.1    | 10392  | -1.1436 | -1.3032 | -1.2964 | -1.248 |
| ILMN_1780141 | TMEM66    | NM_016127.4    | 51669  | -1.2523 | -1.3362 | -1.1583 | -1.249 |
| ILMN_1748578 | RAD21     | NM_006265.1    | 5885   | -1.4413 | -1.3348 | -1.002  | -1.259 |
| ILMN_1780861 | LOC653506 | XM_927769.1    | 653506 | -1.1334 | -1.5687 | -1.0956 | -1.266 |
| ILMN_1665526 | TCEA2     | NM_198723.1    | 6919   | -1.3587 | -1.0855 | -1.406  | -1.283 |
| ILMN_1731203 | KIAA1618  | NM_020954.2    | 57714  | -1.1044 | -1.7708 | -1.0033 | -1.293 |
| ILMN_1722738 | ROGDI     | NM_024589.1    | 79641  | -1.0828 | -1.1208 | -1.7095 | -1.304 |
| ILMN_1662161 | TBC1D13   | NM_018201.2    | 54662  | -1.2579 | -1.2959 | -1.417  | -1.324 |
| ILMN_2201533 | C17orf61  | NM_152766.2    | 254863 | -1.4133 | -1.0874 | -1.4735 | -1.325 |
| ILMN_1685079 | TELO2     | NM_016111.2    | 9894   | -1.079  | -1.1883 | -1.8021 | -1.356 |
| ILMN_1729142 | PRR6      | NM_181716.2    | 201161 | -1.2973 | -1.013  | -1.7668 | -1.359 |
| ILMN_2134224 | ATP13A1   | NM_020410.1    | 57130  | -1.2413 | -1.2706 | -1.6082 | -1.373 |
| ILMN_1789405 | C22orf25  | NM_152906.3    | 128989 | -1.4041 | -1.4286 | -1.3039 | -1.379 |
| ILMN_2261519 | AIRE      | NM_000383.1    | 326    | -1.272  | -1.6397 | -1.233  | -1.382 |
| ILMN_2375156 | PHF7      | NM_173341.1    | 51533  | -1.1112 | -1.3895 | -1.6589 | -1.387 |
| ILMN_2059211 | KIAA0195  | NM_014738.2    | 9772   | -1.584  | -1.0665 | -1.5205 | -1.390 |
| ILMN_1656011 | RGS1      | NM_002922.3    | 5996   | -1.4606 | -1.3155 | -1.4044 | -1.394 |
| ILMN_1699575 | LOC653598 | XM_928338.1    | 653598 | -1.0928 | -1.742  | -1.3759 | -1.404 |
| ILMN_2165867 | DHCR7     | NM_001360.2    | 1717   | -1.2119 | -1.4973 | -1.5144 | -1.408 |
| ILMN_1747251 | LTB4R     | NM_181657.1    | 1241   | -1.7317 | -1.0352 | -1.4595 | -1.409 |
| ILMN_1669456 | NME3      | NM_002513.2    | 4832   | -1.3557 | -1.3489 | -1.5311 | -1.412 |
| ILMN_1709814 | NMRAL1    | NM_020677.2    | 57407  | -1.3324 | -1.3856 | -1.5533 | -1.424 |
| ILMN_1804498 | C7orf27   | NM_152743.2    | 221927 | -1.746  | -1.2812 | -1.2598 | -1.429 |
| ILMN_1750401 | C17orf62  | NM_001100408.1 | 79415  | -1.7293 | -1.0625 | -1.5011 | -1.431 |
| ILMN_1702519 | LOC643466 | XM_926789.1    | 643466 | -1.2282 | -1.5507 | -1.5183 | -1.432 |
| ILMN_1707804 | SULT1A3   | NM_003166.3    | 6818   | -1.1455 | -1.608  | -1.5565 | -1.437 |
| ILMN_1776327 | LOC727820 | XM_001125827.1 | 727820 | -2.0113 | -1.184  | -1.1531 | -1.449 |
| ILMN_1688318 | MGC72104  | NM_207350.1    | 284802 | -1.7614 | -1.3138 | -1.3046 | -1.460 |
| ILMN_1655915 | MMP11     | NM_005940.3    | 4320   | -1.0154 | -1.6674 | -1.727  | -1.470 |
| ILMN_1656900 | SULT1A1   | NM_177536.1    | 6817   | -1.6947 | -1.1218 | -1.5953 | -1.471 |
| ILMN_1684789 | CCDC101   | NM_138414.1    | 112869 | -1.7668 | -1.2891 | -1.3633 | -1.473 |
| ILMN_1710979 | ANKRD39   | NM_016466.4    | 51239  | -1.384  | -1.3161 | -1.7339 | -1.478 |
| ILMN_1763852 | ACACB     | NM_001093.3    | 32     | -2.0249 | -1.3661 | -1.1255 | -1.506 |
| ILMN_1791002 | SKP2      | NM_005983.2    | 6502   | -1.2213 | -1.5991 | -1.703  | -1.508 |
| ILMN_1813846 | P2RX4     | NM_002560.2    | 5025   | -1.1171 | -1.7815 | -1.6378 | -1.512 |
| ILMN_1748730 | CTRC      | NM_007272.2    | 11330  | -1.1093 | -2.0544 | -1.3866 | -1.517 |
| ILMN_1735415 | NUDT16L1  | NM_032349.2    | 84309  | -1.5025 | -1.1523 | -1.8982 | -1.518 |
| ILMN_2056815 | LINGO4    | NM_001004432.1 | 339398 | -1.7613 | -1.4493 | -1.3513 | -1.521 |
| ILMN_1757388 | OCEL1     | NM_024578.1    | 79629  | -1.1113 | -1.2698 | -2.1941 | -1.525 |
| ILMN_1752591 | LEPROTL1  | NM_015344.1    | 23484  | -2.2145 | -1.3429 | -1.0475 | -1.535 |
| ILMN_1701466 | PEX16     | NM_004813.1    | 9409   | -1.2007 | -1.3675 | -2.0434 | -1.537 |
| ILMN_2146657 | FAHD2B    | NM_199336.1    | 151313 | -1.5116 | -1.0108 | -2.0959 | -1.539 |
| ILMN_1880834 | FBXO41    | NM_001080410.1 | 150726 | -1.4824 | -1.0909 | -2.0451 | -1.539 |
| ILMN_1724194 | NPEPL1    | NM_024663.3    | 79716  | -2.1223 | -1.3023 | -1.1952 | -1.540 |
| ILMN_1680925 | SLC9A3R1  | NM_004252.2    | 9368   | -1.7891 | -1.2451 | -1.6003 | -1.545 |
| ILMN_2358914 | SLC35C2   | NM_173073.2    | 51006  | -1.2846 | -1.7553 | -1.595  | -1.545 |
| ILMN_2413331 | TMEM107   | NM_032354.2    | 84314  | -1.0721 | -2.2118 | -1.3572 | -1.547 |
| ILMN_2089175 | SYAP1     | NM_032796.2    | 94056  | -1.7374 | -1.7358 | -1.1761 | -1.550 |
| ILMN_1791912 | SIDT2     | NM_001040455.1 | 51092  | -1.4588 | -1.4997 | -1.7144 | -1.558 |
| ILMN_1728999 | LOC730273 | XM_001124203.1 | 730273 | -1.0515 | -1.7455 | -1.9058 | -1.568 |
| ILMN_2360028 | NFATC3    | NM_173165.1    | 4775   | -1.0408 | -2.0984 | -1.5772 | -1.572 |
| ILMN_1771618 | FLJ37396  | NM_173671.1    | 285754 | -1.3382 | -1.161  | -2.2467 | -1.582 |
| ILMN_1839750 | LOC729776 | XM_001133820.1 | 729776 | -1.1372 | -1.5715 | -2.0482 | -1.586 |
| ILMN_1766797 | CCS       | NM_005125.1    | 9973   | -1.6339 | -1.3439 | -1.7811 | -1.586 |
| ILMN_1674411 | CKAP2     | NM_001098525.1 | 26586  | -1.1707 | -2.3373 | -1.2579 | -1.589 |
| ILMN_1677906 | LOC643287 | XM_928075.2    | 643287 | -1.0398 | -1.8223 | -1.9082 | -1.590 |
| ILMN_1751753 | IDH2      | NM_002168.2    | 3418   | -1.6239 | -1.5813 | -1.5877 | -1.598 |
| ILMN_1752199 | LHPP      | NM_022126.2    | 64077  | -1.7529 | -1.1469 | -1.8964 | -1.599 |
| ILMN_1771870 | FAM98C    | NM_174905.2    | 147965 | -1.512  | -1.4295 | -1.8578 | -1.600 |
| ILMN_1746883 | SAT2      | NM_133491.2    | 112483 | -1.2084 | -1.6803 | -1.9373 | -1.609 |
| ILMN_1795400 | TBCD      | NM_005993.4    | 6904   | -2.7725 | -1.0608 | -1.0071 | -1.613 |
| ILMN_2165369 | HIST1H4B  | NM_003544.2    | 8366   | -1.1325 | -2.1482 | -1.5604 | -1.614 |
| ILMN_1727332 | ATPIF1    | NM_178191.1    | 93974  | -1.0121 | -1.8364 | -1.9985 | -1.616 |
| ILMN_1744795 | TBL1X     | NM_005647.2    | 6907   | -1.9914 | -1.6165 | -1.2392 | -1.616 |
| ILMN_1782331 | TDG       | NM_003211.3    | 6996   | -1.683  | -1.4315 | -1.7464 | -1.620 |
| ILMN_1726666 | GPX3      | NM_002084.3    | 2878   | -2.0295 | -1.8289 | -1.0084 | -1.622 |
| ILMN_2073184 | EDG8      | NM_030760.3    | 53637  | -2.3311 | -1.3035 | -1.2333 | -1.623 |
| ILMN_1810045 | NLRP1     | NM_014922.4    | 22861  | -1.0451 | -2.1293 | -1.6987 | -1.624 |
| ILMN_1740165 | C14orf102 | NM_017970.2    | 55051  | -1.5471 | -1.7623 | -1.5644 | -1.625 |
| ILMN_1672461 | SPPL2B    | NM_001077238.1 | 56928  | -1.0625 | -1.786  | -2.0314 | -1.627 |
| ILMN_1732988 | KIAA1666  | XM_942124.2    | 85376  | -1.1772 | -2.4663 | -1.2693 | -1.638 |
| ILMN_2381537 | RCP9      | NM_014478.3    | 27297  | -1.5701 | -2.1429 | -1.2018 | -1.638 |
| ILMN_1739423 | RN7SK     | NR_001445.1    |        | -1.1473 | -2.2744 | -1.5207 | -1.647 |
| ILMN_1803194 | GALK1     | NM_000154.1    | 2584   | -1.3219 | -1.6471 | -1.9743 | -1.648 |
| ILMN_1815626 | DHCR7     | NM_001360.2    | 1717   | -1.3251 | -1.9014 | -1.7269 | -1.651 |
| ILMN_1788239 | AMDHD1    | NM_152435.1    | 144193 | -1.0052 | -1.8224 | -2.1371 | -1.655 |
| ILMN_1666178 | TP53I13   | NM_138349.2    | 90313  | -1.4077 | -1.3739 | -2.1842 | -1.655 |
| ILMN_2054019 | ISG15     | NM_005101.1    | 9636   | -1.7642 | -1.8676 | -1.3445 | -1.659 |
| ILMN_2294878 | NSUN5     | NM_018044.2    | 55695  | -1.2667 | -1.8206 | -1.8975 | -1.662 |

|              |           |                |        |         |         |         |        |
|--------------|-----------|----------------|--------|---------|---------|---------|--------|
| ILMN_1725241 | GSTK1     | NM_015917.1    | 373156 | -1.496  | -1.8459 | -1.6431 | -1.662 |
| ILMN_2120072 | FLJ13305  | NM_032180.1    | 84140  | -1.0437 | -2.4114 | -1.5549 | -1.670 |
| ILMN_1695961 | CLK3      | NM_003992.2    | 1198   | -1.5102 | -2.3801 | -1.1269 | -1.672 |
| ILMN_1779735 | LOC389541 | NM_001008395.2 | 389541 | -1.6654 | -1.5853 | -1.8365 | -1.696 |
| ILMN_1746919 | LOC643882 | XM_931879.1    | 643882 | -1.9615 | -2.081  | -1.0662 | -1.703 |
| ILMN_1763364 | WHDC1     | NM_001080435.1 | 123720 | -1.6338 | -2.0578 | -1.4354 | -1.709 |
| ILMN_1812384 | NR3C1     | NM_001018077.1 | 2908   | -1.6227 | -1.8246 | -1.6843 | -1.711 |
| ILMN_1679083 | ZNF93     | NM_001004126.1 | 81931  | -1.5159 | -2.4454 | -1.1775 | -1.713 |
| ILMN_2061565 | PLCH2     | NM_014638.2    | 9651   | -2.3661 | -1.7074 | -1.0655 | -1.713 |
| ILMN_1729374 | ETFB      | NM_001985.2    | 2109   | -1.4176 | -2.0606 | -1.6942 | -1.724 |
| ILMN_1723043 | NAPSB     | XR_001413.1    |        | -1.4111 | -2.3452 | -1.4163 | -1.724 |
| ILMN_1695461 | PTPRA     | NM_080840.2    | 5786   | -1.4754 | -1.8499 | -1.8552 | -1.727 |
| ILMN_1753241 | SNTA1     | NM_003098.2    | 6640   | -1.4279 | -1.3721 | -2.386  | -1.729 |
| ILMN_2193233 | MGC29506  | NM_016459.3    | 51237  | -1.3257 | -2.3104 | -1.6019 | -1.746 |
| ILMN_1801101 | ZBTB48    | NM_005341.1    | 3104   | -2.0209 | -1.7684 | -1.4515 | -1.747 |
| ILMN_1739393 | SELE      | NM_000450.1    | 6401   | -1.3823 | -2.7654 | -1.0955 | -1.748 |
| ILMN_1771411 | ALG6      | NM_013339.2    | 29929  | -1.1554 | -1.999  | -2.0954 | -1.750 |
| ILMN_1676408 | TAGAP     | NM_138810.2    | 117289 | -2.0869 | -1.1133 | -2.0548 | -1.752 |
| ILMN_1744604 | CYBA      | NM_000101.2    | 1535   | -1.5686 | -2.0848 | -1.6026 | -1.752 |
| ILMN_1662331 | PDSS2     | NM_020381.2    | 57107  | -1.2873 | -2.4312 | -1.5519 | -1.757 |
| ILMN_1776515 | MPPE1     | NM_023075.4    | 65258  | -1.6031 | -1.8227 | -1.8502 | -1.759 |
| ILMN_1803136 | RAB4B     | NM_016154.2    | 53916  | -1.1969 | -2.1164 | -1.9873 | -1.767 |
| ILMN_1665428 | GSDMDC1   | NM_024736.5    | 79792  | -1.7051 | -1.9614 | -1.6365 | -1.768 |
| ILMN_1801246 | IFITM1    | NM_003641.3    | 8519   | -2.5514 | -1.7458 | -1.0142 | -1.770 |
| ILMN_1726873 | TPCN2     | NM_139075.2    | 219931 | -1.0299 | -1.872  | -2.4171 | -1.773 |
| ILMN_2389376 | WDR23     | NM_025230.3    | 80344  | -1.5287 | -2.7356 | -1.0718 | -1.779 |
| ILMN_1695962 | SLC12A9   | NM_020246.2    | 56996  | -1.5313 | -1.8513 | -1.9574 | -1.780 |
| ILMN_1759341 | MAN2B1    | NM_000528.2    | 4125   | -1.0077 | -1.7814 | -2.5553 | -1.781 |
| ILMN_1814039 | LOC653086 | XM_930995.1    | 653086 | -1.7528 | -2.3482 | -1.2467 | -1.783 |
| ILMN_1797693 | BRI3BP    | NM_080626.5    | 140707 | -1.0657 | -2.71   | -1.5731 | -1.783 |
| ILMN_1657475 | GALT      | NM_000155.2    | 2592   | -2.4792 | -1.3436 | -1.5277 | -1.784 |
| ILMN_1791396 | DGCR6     | NM_005675.3    | 8214   | -1.1681 | -1.8661 | -2.3322 | -1.789 |
| ILMN_1659075 | HLA-DOA   | NM_002119.3    | 3111   | -1.3165 | -2.0405 | -2.0131 | -1.790 |
| ILMN_1716056 | TMEM112B  | NM_033200.1    | 91289  | -1.4901 | -2.0667 | -1.8167 | -1.791 |
| ILMN_1775703 | TRAPPC6A  | NM_024108.1    | 79090  | -1.7389 | -1.1728 | -2.4746 | -1.795 |
| ILMN_1682226 | CLDN15    | NM_014343.1    | 24146  | -1.8881 | -1.9284 | -1.5748 | -1.797 |
| ILMN_2323048 | ERP29     | NM_001034025.1 | 10961  | -1.0557 | -1.9768 | -2.3664 | -1.800 |
| ILMN_1711073 | LOC653489 | XM_934113.1    | 653489 | -2.0182 | -2.1237 | -1.2603 | -1.801 |
| ILMN_1710124 | CMTM8     | NM_178868.3    | 152189 | -1.3902 | -1.8204 | -2.2096 | -1.807 |
| ILMN_1749875 | LOC728715 | XM_001128260.1 | 728715 | -2.0828 | -1.6472 | -1.6919 | -1.807 |
| ILMN_1757106 | Mar-06    | NM_005885.2    | 10299  | -2.1437 | -1.83   | -1.8485 | -1.819 |
| ILMN_1750093 | SDHALP1   | NR_003264.1    |        | -1.7821 | -2.2438 | -1.4358 | -1.821 |
| ILMN_1758806 | C21orf2   | NM_004928.1    | 755    | -2.6866 | -1.663  | -1.1329 | -1.828 |
| ILMN_1690114 | PTPLAD2   | NM_001010915.1 | 401494 | -1.9803 | -2.4725 | -1.0358 | -1.830 |
| ILMN_1662328 | CNNM3     | NM_017623.4    | 26505  | -2.1443 | -1.7916 | -1.5659 | -1.834 |
| ILMN_1704024 | TMEM160   | NM_017854.1    | 54958  | -1.2573 | -2.0033 | -2.2845 | -1.848 |
| ILMN_1784467 | NUP210    | NM_024923.2    | 23225  | -2.3632 | -1.1841 | -2.0414 | -1.863 |
| ILMN_2133675 | SGSH      | NM_000199.2    | 6448   | -1.0415 | -2.0386 | -2.522  | -1.867 |
| ILMN_2406552 | LRDD      | NM_145887.2    | 55367  | -1.7421 | -2.0874 | -1.8043 | -1.878 |
| ILMN_2273224 | SLC4A5    | NM_133478.2    | 57835  | -2.1256 | -2.3626 | -1.1618 | -1.883 |
| ILMN_1690682 | B3GALT4   | NM_003782.3    | 8705   | -1.1089 | -2.3478 | -2.1983 | -1.885 |
| ILMN_1743476 | LOC653829 | XM_935802.1    | 653829 | -2.0521 | -2.3341 | -1.2796 | -1.889 |
| ILMN_1794643 | ZGPAT     | NM_032527.3    | 84619  | -1.9723 | -2.0118 | -1.6983 | -1.894 |
| ILMN_2406410 | RHBD2     | NM_001040456.1 | 57414  | -1.4814 | -2.0168 | -2.185  | -1.894 |
| ILMN_1701613 | RARRES3   | NM_004585.3    | 5920   | -3.372  | -1.0873 | -1.2327 | -1.897 |
| ILMN_1695404 | LY6E      | NM_002346.1    | 4061   | -1.1456 | -1.9475 | -2.6154 | -1.903 |
| ILMN_1676759 | DDX27     | NM_017895.6    | 55661  | -1.5142 | -2.0186 | -2.1776 | -1.903 |
| ILMN_1711928 | FLJ20920  | NM_025149.3    | 80221  | -1.3054 | -1.9281 | -2.4864 | -1.907 |
| ILMN_1715625 | C20orf94  | NM_001009608.1 | 128710 | -1.2907 | -1.9658 | -2.4641 | -1.907 |
| ILMN_1733276 | CYSLTR1   | NM_006639.2    | 10800  | -2.244  | -2.0143 | -1.4698 | -1.909 |
| ILMN_2363027 | RAD51     | NM_133487.1    | 5888   | -1.9402 | -2.4462 | -1.3491 | -1.912 |
| ILMN_2399264 | Sep-06    | NM_145800.2    | 23157  | -2.3911 | -2.0594 | -1.2967 | -1.916 |
| ILMN_2093389 | SNAPC1    | NM_003082.2    | 6617   | -1.9617 | -2.7681 | -1.0217 | -1.917 |
| ILMN_2275803 | LRRC45    | NM_144999.2    | 201255 | -2.1477 | -1.7749 | -1.8391 | -1.921 |
| ILMN_1694399 | ICA1      | NM_022308.1    | 3382   | -2.0668 | -2.4904 | -1.2217 | -1.926 |
| ILMN_1657996 | LOC642035 | XM_936105.1    | 642035 | -1.9213 | -2.6541 | -1.2137 | -1.930 |
| ILMN_1755114 | EIF2AK4   | NM_001013703.2 | 440275 | -2.4096 | -2.2123 | -1.1705 | -1.931 |
| ILMN_2194577 | PLVAP     | NM_031310.1    | 83483  | -1.5949 | -2.0154 | -2.1835 | -1.931 |
| ILMN_1704091 | DGAT1     | NM_012079.2    | 8694   | -1.1834 | -2.3475 | -2.2636 | -1.932 |
| ILMN_2077680 | CLDND2    | NM_152353.1    | 125875 | -1.5914 | -2.1608 | -2.0447 | -1.932 |
| ILMN_1668605 | ASAH1     | NM_014435.3    | 27163  | -1.0081 | -2.5765 | -2.2127 | -1.932 |
| ILMN_2300970 | ETFB      | NM_001014763.1 | 2109   | -1.9074 | -2.0749 | -1.8253 | -1.936 |
| ILMN_1811221 | SLC5A8    | NM_145913.2    | 160728 | -2.1754 | -2.4526 | -1.2022 | -1.943 |
| ILMN_2112915 | DRD4      | NM_000797.2    | 1815   | -1.5905 | -2.1638 | -2.0782 | -1.944 |
| ILMN_1731063 | ST5       | NM_139157.2    | 6764   | -1.0671 | -2.9116 | -1.8556 | -1.945 |
| ILMN_2321931 | DCLRE1C   | NM_022487.2    | 64421  | -2.3566 | -2.3443 | -1.1366 | -1.946 |
| ILMN_1657578 | ZNF223    | NM_013361.3    | 7766   | -2.1897 | -2.4263 | -1.242  | -1.953 |
| ILMN_1745583 | EXOC1     | NM_001024924.1 | 55763  | -1.2285 | -2.4239 | -2.2111 | -1.955 |
| ILMN_1809437 | RHBD2     | NM_001040456.1 | 57414  | -1.4882 | -2.1607 | -2.2285 | -1.959 |
| ILMN_1707591 | TNIP3     | NM_024873.3    | 79931  | -1.4145 | -2.2467 | -2.2357 | -1.966 |
| ILMN_1791306 | C9orf103  | NM_001001551.1 | 414328 | -1.4316 | -2.2063 | -2.3214 | -1.986 |
| ILMN_2047885 | PCDHB9    | NM_019119.3    | 56127  | -2.2286 | -2.4805 | -1.259  | -1.989 |
| ILMN_1787813 | SLC5A3    | NM_006933.4    | 6526   | -1.6548 | -2.0627 | -2.2608 | -1.993 |
| ILMN_1687971 | CAPN3     | NM_024344.1    | 825    | -1.4483 | -2.1987 | -2.3441 | -1.997 |
| ILMN_1797875 | ALOX5AP   | NM_001629.2    | 241    | -1.5285 | -2.8284 | -1.6438 | -2.000 |
| ILMN_2394381 | CLN3      | NM_000086.1    | 1201   | -1.4147 | -2.3935 | -2.2029 | -2.004 |
| ILMN_1785439 | CD79B     | NM_021602.1    | 974    | -2.8089 | -2.1069 | -1.1112 | -2.009 |
| ILMN_1677200 | CYFIP2    | NM_014376.2    | 26999  | -3.0922 | -1.8183 | -1.1335 | -2.015 |
| ILMN_1804656 | C12orf62  | NM_032901.2    | 84987  | -1.3621 | -2.4641 | -2.2554 | -2.027 |
| ILMN_1772261 | GLG1      | NM_012201.4    | 2734   | -1.0123 | -2.5118 | -2.5773 | -2.034 |

|              |           |                |        |         |         |         |        |
|--------------|-----------|----------------|--------|---------|---------|---------|--------|
| ILMN_1787314 | ALS2CR14  | NM_178231.1    | 65068  | -1.6928 | -2.6662 | -1.7652 | -2.041 |
| ILMN_2246548 | FLJ46109  | NR_003082.1    | 653399 | -1.4798 | -1.8571 | -2.8142 | -2.050 |
| ILMN_1774761 | CCR2      | NM_000647.4    | 1231   | -2.0335 | -2.0909 | -2.0393 | -2.055 |
| ILMN_1699214 | LOC647450 | XM_936518.1    | 647450 | -2.1043 | -2.2521 | -1.8105 | -2.056 |
| ILMN_1652199 | LOC642113 | XM_936253.1    | 642113 | -3.2654 | -1.4847 | -1.4403 | -2.063 |
| ILMN_2161286 | FAM40B    | NM_020704.1    | 57464  | -2.2577 | -2.7319 | -1.2533 | -2.081 |
| ILMN_2222880 | SLC25A42  | NM_178526.1    | 284439 | -2.1553 | -1.9835 | -2.105  | -2.081 |
| ILMN_2366330 | URP2      | NM_031471.4    | 83706  | -2.1539 | -2.925  | -1.1982 | -2.092 |
| ILMN_1653412 | RAXL1     | NM_032753.2    | 84839  | -2.1983 | -3.0323 | -1.0637 | -2.098 |
| ILMN_1771957 | MAN1B1    | NM_016219.2    | 11253  | -1.6267 | -2.2676 | -2.4014 | -2.099 |
| ILMN_2383107 | VPS41     | NM_014396.3    | 27072  | -2.1284 | -2.9335 | -1.2586 | -2.107 |
| ILMN_2270845 | WDR74     | NM_018093.1    | 54663  | -2.6093 | -2.6125 | -1.103  | -2.108 |
| ILMN_1768510 | MAN2B2    | NM_015274.1    | 23324  | -1.3033 | -2.6671 | -2.3663 | -2.112 |
| ILMN_1676632 | DISC1     | NM_001012959.1 | 27185  | -1.448  | -2.7698 | -2.1299 | -2.116 |
| ILMN_2148527 | H19       | NR_002196.1    | 283120 | -2.0788 | -3.0228 | -1.2527 | -2.118 |
| ILMN_1678690 | UPB1      | NM_016327.2    | 51733  | -1.1679 | -2.7562 | -2.466  | -2.130 |
| ILMN_2233050 | PLA2G2D   | NM_012400.2    | 26279  | -2.1104 | -2.7701 | -1.5268 | -2.136 |
| ILMN_1683786 | FYTTD1    | NM_001011537.1 | 84248  | -2.1007 | -2.5032 | -1.8162 | -2.140 |
| ILMN_2262044 | PARP10    | NM_032789.1    | 84875  | -2.2749 | -2.6765 | -1.4711 | -2.141 |
| ILMN_2305721 | POMT1     | NM_007171.2    | 10585  | -1.4358 | -2.54   | -2.4619 | -2.146 |
| ILMN_1720799 | GPSN2     | NM_138501.4    | 9524   | -1.7147 | -2.596  | -2.138  | -2.150 |
| ILMN_1690237 | PCDHB19P  | NR_001282.1    |        | -2.6047 | -2.7274 | -1.1194 | -2.151 |
| ILMN_1749834 | LOC388588 | XM_932890.2    | 388588 | -1.1009 | -2.4589 | -2.8991 | -2.153 |
| ILMN_1695759 | AMDHD2    | NM_015944.2    | 51005  | -2.2114 | -2.0766 | -2.1824 | -2.157 |
| ILMN_1700307 | FLJ38969  | XM_928774.1    | 401303 | -2.3608 | -2.318  | -1.7958 | -2.158 |
| ILMN_1814315 | PBXIP1    | NM_020524.2    | 57326  | -2.6412 | -1.766  | -2.0704 | -2.159 |
| ILMN_1660364 | PSCD4     | NM_013385.2    | 27128  | -2.9683 | -1.6207 | -1.8931 | -2.161 |
| ILMN_1728528 | ZNF655    | NM_001009956.1 | 79027  | -1.1298 | -2.9857 | -2.4149 | -2.177 |
| ILMN_1671482 | GALM      | NM_138801.1    | 130589 | -2.8995 | -2.2258 | -1.4481 | -2.191 |
| ILMN_1684346 | TNFAIP8L1 | NM_152362.1    | 126282 | -2.2597 | -2.5029 | -1.838  | -2.200 |
| ILMN_2345872 | SUMF2     | NM_001042470.1 | 25870  | -1.1433 | -2.6887 | -2.786  | -2.206 |
| ILMN_1727183 | ZNF763    | NM_001012753.1 | 284390 | -2.3511 | -2.1358 | -2.1396 | -2.209 |
| ILMN_1738482 | CEP27     | NM_018097.1    | 55142  | -2.373  | -2.7965 | -1.4574 | -2.209 |
| ILMN_1691566 | CCDC140   | NM_153038.1    | 151278 | -1.0912 | -2.917  | -2.6257 | -2.211 |
| ILMN_1671854 | Sep-01    | XM_944593.1    | 1731   | -2.5186 | -2.3527 | -1.8177 | -2.230 |
| ILMN_1769508 | PIGX      | NM_017861.1    | 54965  | -1.7664 | -3.107  | -1.8249 | -2.233 |
| ILMN_1755138 | NEK8      | NM_178170.2    | 284086 | -1.9921 | -3.0644 | -1.6544 | -2.237 |
| ILMN_1654396 | ITGB2     | NM_000211.1    | 3689   | -2.5706 | -2.3279 | -1.8136 | -2.237 |
| ILMN_1740938 | APOE      | NM_000041.2    | 348    | -1.0646 | -3.4802 | -2.1696 | -2.238 |
| ILMN_1652846 | PCYT2     | NM_002861.2    | 5833   | -2.1364 | -1.9514 | -2.6519 | -2.247 |
| ILMN_1680344 | MYOM1     | NM_003803.3    | 8736   | -1.2346 | -3.0153 | -2.5349 | -2.262 |
| ILMN_1761820 | EDARADD   | NM_145861.2    | 128178 | -2.9882 | -1.9939 | -1.8514 | -2.278 |
| ILMN_1719986 | PIK3IP1   | NM_052880.3    | 113791 | -3.7845 | -2.0422 | -1.0913 | -2.306 |
| ILMN_2127298 | F2RL3     | NM_003950.2    | 9002   | -1.5616 | -4.0628 | -1.2988 | -2.308 |
| ILMN_1735058 | CHST12    | NM_018641.3    | 55501  | -2.3946 | -2.324  | -2.2094 | -2.309 |
| ILMN_1804148 | TMED4     | NM_182547.2    | 222068 | -1.1201 | -3.2366 | -2.5719 | -2.310 |
| ILMN_2175912 | ITGB2     | NM_000211.2    | 3689   | -2.6703 | -2.4601 | -1.8138 | -2.315 |
| ILMN_1757742 | ZRANB1    | NM_017580.2    | 54764  | -2.0126 | -2.7177 | -2.2306 | -2.320 |
| ILMN_1811328 | DPP7      | NM_013379.2    | 29952  | -1.0102 | -2.8311 | -3.1424 | -2.328 |
| ILMN_1761733 | HLA-DMB   | NM_002118.3    | 3109   | -2.1412 | -2.5259 | -2.335  | -2.334 |
| ILMN_1668822 | BATF      | NM_006399.2    | 10538  | -3.6179 | -2.3826 | -1.0315 | -2.344 |
| ILMN_1763452 | EVI2B     | NM_006495.3    | 2124   | -3.669  | -1.8204 | -1.5537 | -2.348 |
| ILMN_1681437 | DCXR      | NM_016286.2    | 51181  | -2.0032 | -2.5597 | -2.4939 | -2.352 |
| ILMN_1771320 | FLJ38717  | NM_001004322.1 | 401261 | -3.0834 | -2.4021 | -1.5739 | -2.353 |
| ILMN_1735816 | CYP4A11   | NM_000778.2    | 1579   | -1.5637 | -3.3581 | -2.1673 | -2.363 |
| ILMN_1678457 | ZNF600    | NM_198457.1    | 162966 | -2.0928 | -3.5005 | -1.5171 | -2.370 |
| ILMN_1812250 | LOC644642 | XM_932279.1    | 644642 | -2.6446 | -2.6184 | -1.8686 | -2.377 |
| ILMN_2148944 | ADCY4     | NM_139247.2    | 196883 | -1.0686 | -4.2395 | -1.8357 | -2.381 |
| ILMN_2207505 | LEP       | NM_000230.1    | 3952   | -2.5795 | -3.1691 | -1.3997 | -2.383 |
| ILMN_2372136 | PH-4      | NM_177938.2    | 54681  | -1.2593 | -2.9378 | -2.9618 | -2.386 |
| ILMN_1783743 | FLJ41423  | NM_001001679.1 | 399886 | -1.5895 | -3.0913 | -2.486  | -2.389 |
| ILMN_1683277 | KIAA0319L | NM_024874.3    | 79932  | -1.8718 | -2.5908 | -2.7108 | -2.391 |
| ILMN_1785252 | SLC26A6   | NM_134426.2    | 65010  | -1.372  | -2.9131 | -2.8946 | -2.393 |
| ILMN_1807981 | SIGIRR    | XM_001129013.1 | 59307  | -2.0728 | -2.2067 | -2.9243 | -2.401 |
| ILMN_1693912 | SLC47A2   | NM_152908.3    | 146802 | -1.1857 | -3.363  | -2.657  | -2.402 |
| ILMN_1795464 | LTA       | NM_000595.2    | 4049   | -2.7828 | -3.1877 | -1.2359 | -2.402 |
| ILMN_1770824 | ARHGAP4   | NM_001666.2    | 393    | -3.809  | -2.0138 | -1.3956 | -2.406 |
| ILMN_1711514 | COCH      | NM_004086.1    | 1690   | -1.0996 | -3.4647 | -2.6553 | -2.407 |
| ILMN_2391512 | ASAH1     | NM_014435.2    | 27163  | -1.4362 | -3.076  | -2.7137 | -2.409 |
| ILMN_2362982 | ARID4B    | NM_016374.5    | 51742  | -2.1523 | -2.5263 | -2.5503 | -2.410 |
| ILMN_2199389 | VIPR1     | NM_004624.2    | 7433   | -2.5939 | -2.6546 | -2.0047 | -2.418 |
| ILMN_2363392 | TNFSF14   | NM_172014.1    | 8740   | -2.7035 | -2.6269 | -1.9255 | -2.419 |
| ILMN_1755897 | UGT2B7    | XM_001128725.1 | 7364   | -1.6641 | -3.1652 | -2.433  | -2.421 |
| ILMN_1719543 | MAF       | NM_005360.3    | 4094   | -2.6853 | -2.1588 | -2.4685 | -2.438 |
| ILMN_1679194 | UGT2B7    | XM_001128725.1 | 7364   | -1.9717 | -3.0164 | -2.3351 | -2.441 |
| ILMN_1769135 | DPP7      | NM_013379.2    | 29952  | -1.3479 | -2.8913 | -3.1069 | -2.449 |
| ILMN_1679826 | CST7      | NM_003650.2    | 8530   | -3.1781 | -2.5777 | -1.6109 | -2.456 |
| ILMN_1749362 | CD28      | NM_006139.1    | 940    | -3.0072 | -2.8881 | -1.4761 | -2.457 |
| ILMN_1787461 | RUNX3     | NM_004350.2    | 864    | -3.6482 | -2.2898 | -1.4358 | -2.458 |
| ILMN_1653026 | PLAC8     | NM_016619.1    | 51316  | -3.8606 | -1.702  | -2.0164 | -2.526 |
| ILMN_1691341 | IL7R      | XM_937367.1    | 3575   | -3.8886 | -2.0322 | -1.6767 | -2.533 |
| ILMN_1795835 | LOC338758 | XM_931359.2    | 338758 | -1.5498 | -2.8183 | -3.2763 | -2.548 |
| ILMN_1686555 | FYN       | NM_153047.1    | 2534   | -4.0192 | -1.4743 | -2.1592 | -2.551 |
| ILMN_1785095 | ATP6V0E2  | NM_145230.2    | 155066 | -1.4827 | -3.3016 | -2.8893 | -2.558 |
| ILMN_1795190 | CLDN2     | NM_020384.2    | 9075   | -1.0367 | -3.877  | -2.762  | -2.559 |
| ILMN_1756469 | GAMT      | NM_000156.4    | 2593   | -1.9785 | -2.7178 | -3.0072 | -2.568 |
| ILMN_1678678 | SLC37A4   | NM_001467.4    | 2542   | -1.0025 | -3.7454 | -2.9817 | -2.577 |
| ILMN_1688490 | PTP4A2    | XM_944915.1    | 8073   | -2.4782 | -3.4066 | -1.8507 | -2.579 |
| ILMN_1748473 | GIMAP4    | NM_018326.2    | 55303  | -2.9794 | -3.6603 | -1.0967 | -2.579 |
| ILMN_2206272 | D2HGDH    | NM_152783.3    | 728294 | -3.5541 | -1.887  | -2.3282 | -2.590 |

|              |             |                |        |         |         |         |        |
|--------------|-------------|----------------|--------|---------|---------|---------|--------|
| ILMN_1672661 | SP110       | NM_004510.2    | 3431   | -2.063  | -2.6462 | -3.1031 | -2.604 |
| ILMN_1674063 | OAS2        | NM_016817.2    | 4939   | -3.2671 | -3.4097 | -1.1497 | -2.609 |
| ILMN_1774375 | LOC284422   | XM_209196.5    | 284422 | -1.2009 | -3.4904 | -3.1447 | -2.612 |
| ILMN_1695311 | HLA-DMA     | NM_006120.2    | 3108   | -2.2802 | -3.2309 | -2.3482 | -2.620 |
| ILMN_1779677 | ZCCHC6      | NM_024617.2    | 79670  | -1.8647 | -2.6902 | -3.3219 | -2.626 |
| ILMN_1654629 | TMEM175     | NM_032326.2    | 84286  | -1.6124 | -2.9901 | -3.3543 | -2.652 |
| ILMN_1684943 | TRAT1       | NM_016388.2    | 50852  | -3.4739 | -2.9326 | -1.5735 | -2.660 |
| ILMN_2216582 | LYL1        | NM_005583.3    | 4066   | -1.4712 | -3.98   | -2.5344 | -2.662 |
| ILMN_1669878 | GUSB        | NM_000181.2    | 2990   | -1.4348 | -3.3802 | -3.1956 | -2.670 |
| ILMN_1733559 | LOC10000858 | NR_003287.1    |        | -1.2183 | -3.3918 | -3.4059 | -2.672 |
| ILMN_1652533 | DKFZp434K19 | NM_001029950.1 | 29797  | -2.8887 | -2.9353 | -2.2182 | -2.681 |
| ILMN_1802131 | SLC13A1     | NM_022444.3    | 6561   | -1.0171 | -3.8977 | -3.1348 | -2.683 |
| ILMN_1786426 | TMEM149     | NM_024660.2    | 79713  | -3.3848 | -1.2721 | -3.3956 | -2.684 |
| ILMN_2212763 | ICAM3       | NM_002162.2    | 3385   | -3.6849 | -1.837  | -2.5504 | -2.691 |
| ILMN_1700268 | QPRT        | NM_014298.3    | 23475  | -1.3058 | -3.5021 | -3.3272 | -2.712 |
| ILMN_1738678 | C9orf130    | XM_939697.1    | 286354 | -2.6747 | -3.1883 | -2.356  | -2.740 |
| ILMN_1752755 | VWF         | NM_000552.3    | 7450   | -1.8001 | -4.4323 | -2.0032 | -2.745 |
| ILMN_1743663 | POMT1       | NM_007171.2    | 10585  | -1.8323 | -3.1877 | -3.2207 | -2.747 |
| ILMN_2228780 | SLC5A11     | NM_052944.2    | 115584 | -1.0888 | -3.5474 | -3.7439 | -2.793 |
| ILMN_1764230 | GNPTG       | NM_032520.3    | 84572  | -1.071  | -3.7829 | -3.563  | -2.806 |
| ILMN_1811117 | LOC400986   | XM_001126815.1 | 400986 | -2.4815 | -2.9369 | -3.0013 | -2.807 |
| ILMN_1653575 | IL18BP      | NM_173044.1    | 10068  | -1.6077 | -3.5664 | -3.25   | -2.808 |
| ILMN_1694780 | GCHFR       | NM_005258.2    | 2644   | -2.5207 | -2.8098 | -3.141  | -2.824 |
| ILMN_1660125 | SFMBT2      | NM_001029880.1 | 57713  | -2.5086 | -2.6005 | -3.4101 | -2.840 |
| ILMN_1792538 | CD7         | NM_006137.6    | 924    | -5.0813 | -1.585  | -1.8677 | -2.845 |
| ILMN_2305407 | ZBTB16      | NM_006006.4    | 7704   | -2.1117 | -3.1828 | -3.2774 | -2.857 |
| ILMN_1661335 | SPTBN1      | NM_003128.2    | 6711   | -2.7971 | -2.7731 | -3.0127 | -2.861 |
| ILMN_1682993 | NGK7        | NM_005601.3    | 4818   | -5.1142 | -1.5888 | -1.8993 | -2.867 |
| ILMN_1779875 | THY1        | NM_006288.2    | 7070   | -1.4492 | -4.0854 | -3.0689 | -2.868 |
| ILMN_1749403 | TSPAN33     | NM_178562.2    | 340348 | -1.6185 | -3.783  | -3.2283 | -2.877 |
| ILMN_1794213 | ABHD14A     | NM_015407.3    | 25864  | -1.3945 | -3.9689 | -3.2716 | -2.878 |
| ILMN_1729234 | TPP1        | NM_000391.3    | 1200   | -1.4544 | -3.9787 | -3.2309 | -2.888 |
| ILMN_1711617 | GMFG        | NM_004877.1    | 9535   | -3.6235 | -3.165  | -1.8761 | -2.888 |
| ILMN_1697377 | LOC649841   | XM_938906.2    | 649841 | -3.1696 | -2.7999 | -2.6992 | -2.890 |
| ILMN_1675266 | NAGPA       | NM_016256.2    | 51172  | -1.7201 | -3.4658 | -3.5095 | -2.898 |
| ILMN_2183687 | LIME1       | NM_017806.1    | 54923  | -3.036  | -3.1755 | -2.6034 | -2.938 |
| ILMN_1808395 | CENTB1      | NM_014716.2    | 9744   | -5.2393 | -1.9651 | -1.6339 | -2.946 |
| ILMN_2415776 | WVVOX       | NM_130844.1    | 51741  | -1.86   | -3.5393 | -3.4868 | -2.962 |
| ILMN_1662587 | PNPLA7      | NM_152286.2    | 375775 | -3.0075 | -2.9346 | -3.0404 | -2.994 |
| ILMN_1785570 | SUSD3       | NM_145006.2    | 203328 | -3.4963 | -2.7389 | -2.754  | -2.996 |
| ILMN_1690979 | SLC17A3     | NM_001098486.1 | 10786  | -1.5581 | -3.9724 | -3.537  | -3.023 |
| ILMN_1774901 | GDPD3       | NM_024307.2    | 79153  | -1.7896 | -3.7312 | -3.5877 | -3.036 |
| ILMN_1725441 | NFATC2IP    | NM_032815.3    | 84901  | -2.0983 | -3.6321 | -3.3867 | -3.039 |
| ILMN_1740443 | LOC728811   | XR_015382.1    | 728811 | -1.7655 | -4.0521 | -3.3341 | -3.051 |
| ILMN_1727098 | PPP1R16B    | NM_015568.2    | 26051  | -4.7465 | -2.4225 | -1.9962 | -3.055 |
| ILMN_1664912 | IL11RA      | NM_004512.3    | 3590   | -4.8116 | -2.1558 | -2.2415 | -3.070 |
| ILMN_1746819 | C5          | NM_001735.2    | 727    | -1.2157 | -4.0617 | -3.9669 | -3.081 |
| ILMN_1713156 | MSL3L1      | NM_078629.1    | 10943  | -3.5539 | -3.0914 | -2.6768 | -3.107 |
| ILMN_1793182 | SLC36A2     | NM_181776.1    | 153201 | -1.5098 | -4.5153 | -3.3151 | -3.113 |
| ILMN_1743205 | ABCA7       | NM_019112.3    | 10347  | -3.8854 | -2.7687 | -2.6931 | -3.116 |
| ILMN_1690884 | APOA1       | NM_000039.1    | 335    | -1.2322 | -4.3271 | -3.8188 | -3.126 |
| ILMN_2127842 | HBA2        | NM_000517.3    | 3040   | -5.5367 | -2.4795 | -1.4794 | -3.165 |
| ILMN_1690064 | RUNDC2C     | NR_002939.2    |        | -2.1187 | -3.629  | -3.7664 | -3.171 |
| ILMN_1690040 | TM7SF2      | NM_003273.2    | 7108   | -1.2704 | -4.2578 | -4.0268 | -3.185 |
| ILMN_2408748 | SLC22A12    | NM_153378.1    | 116085 | -2.5333 | -4.3111 | -2.8701 | -3.238 |
| ILMN_2208903 | CD52        | NM_001803.2    | 1043   | -5.5937 | -2.3001 | -1.9095 | -3.268 |
| ILMN_1691264 | NAT8B       | NM_016347.2    | 51471  | -1.0914 | -4.7938 | -4.0096 | -3.298 |
| ILMN_1781514 | PCDH17      | NM_014459.2    | 27253  | -1.398  | -4.8822 | -3.6158 | -3.299 |
| ILMN_2366212 | CD79B       | NM_001039933.1 | 974    | -3.3555 | -3.3162 | -3.2433 | -3.305 |
| ILMN_1713807 | MAN1C1      | NM_020379.2    | 57134  | -1.7074 | -4.3232 | -3.8968 | -3.309 |
| ILMN_1711078 | CDC2L2      | NM_024011.2    | 728642 | -2.3685 | -3.862  | -3.7282 | -3.320 |
| ILMN_1782939 | ALB         | NM_000477.3    | 213    | -1.8006 | -4.8911 | -3.3363 | -3.343 |
| ILMN_2113535 | PCYOX1      | NM_016297.2    | 51449  | -1.6394 | -4.8136 | -3.7619 | -3.405 |
| ILMN_1682763 | ALB         | NM_000477.3    | 213    | -1.5791 | -5.0909 | -3.5887 | -3.420 |
| ILMN_1778723 | AMICA1      | NM_153206.1    | 120425 | -5.5477 | -2.4556 | -2.2723 | -3.425 |
| ILMN_1810233 | UGT2B11     | NM_001073.1    | 10720  | -1.0132 | -5.0013 | -4.2688 | -3.428 |
| ILMN_2296510 | SLC5A12     | NM_001042366.1 | 159963 | -1.0942 | -5.0386 | -4.1688 | -3.434 |
| ILMN_1735386 | SLC22A11    | NM_018484.2    | 55867  | -1.6903 | -4.6664 | -3.9781 | -3.445 |
| ILMN_1776678 | GIMAP7      | NM_153236.3    | 168537 | -3.8583 | -3.9364 | -2.5964 | -3.464 |
| ILMN_1663699 | SLC03A1     | NM_013272.2    | 28232  | -1.3682 | -4.7712 | -4.417  | -3.519 |
| ILMN_1735445 | SLC7A9      | NM_014270.3    | 11136  | -1.3374 | -5.0109 | -4.3157 | -3.555 |
| ILMN_2377669 | CD247       | NM_198053.1    | 919    | -6.305  | -2.794  | -1.6529 | -3.584 |
| ILMN_1737387 | LOC728441   | XM_001129412.1 | 728441 | -1.0745 | -5.1222 | -4.5961 | -3.598 |
| ILMN_2252309 | DPP7        | NM_013379.2    | 29952  | -2.8388 | -4.2739 | -3.9222 | -3.678 |
| ILMN_1746565 | CD6         | NM_006725.2    | 923    | -6.7803 | -3.0894 | -1.2043 | -3.691 |
| ILMN_2415786 | CD96        | NM_005816.4    | 10225  | -6.5281 | -2.6923 | -1.9193 | -3.713 |
| ILMN_2405391 | SLC22A6     | NM_153276.1    | 9356   | -1.5286 | -5.4042 | -4.2805 | -3.738 |
| ILMN_1755203 | CUBN        | NM_001081.3    | 8029   | -2.7305 | -4.8717 | -3.7061 | -3.769 |
| ILMN_2079655 | KLRB1       | NM_002258.2    | 3820   | -6.5913 | -2.4924 | -2.2322 | -3.772 |
| ILMN_1731941 | APOM        | NM_019101.2    | 55937  | -1.6773 | -5.2207 | -4.4455 | -3.781 |
| ILMN_1753340 | LOC728226   | XM_001128310.1 | 728226 | -1.3175 | -5.2696 | -4.7772 | -3.788 |
| ILMN_1795089 | FLJ21438    | NM_022904.1    | 64926  | -5.2378 | -4.4789 | -1.8048 | -3.841 |
| ILMN_2078599 | ACP5        | NM_001611.2    | 54     | -1.296  | -5.3233 | -4.9695 | -3.863 |
| ILMN_1808677 | UGT2B17     | NM_001077.2    | 7367   | -1.2416 | -5.638  | -4.7693 | -3.883 |
| ILMN_1815480 | NAT8        | NM_003960.2    | 9027   | -1.6793 | -5.3909 | -4.635  | -3.902 |
| ILMN_1780060 | FCN3        | NM_003665.2    | 8547   | -1.7571 | -5.7657 | -4.1954 | -3.906 |
| ILMN_1676924 | CD247       | NM_000734.2    | 919    | -6.1577 | -2.8765 | -2.7632 | -3.932 |
| ILMN_1777797 | AFM         | NM_001133.2    | 173    | -1.126  | -5.8538 | -4.8799 | -3.953 |
| ILMN_1740005 | SERPINF2    | NM_000934.3    | 5345   | -1.213  | -5.4982 | -5.1849 | -3.965 |
| ILMN_1701603 | ALPL        | NM_000478.3    | 249    | -1.3346 | -5.7566 | -5.2753 | -4.122 |



|              |          |             |        |         |         |         |        |
|--------------|----------|-------------|--------|---------|---------|---------|--------|
| ILMN_2162819 | UGT2B11  | NM_001073.1 | 10720  | -1.3058 | -5.854  | -5.3208 | -4.160 |
| ILMN_1797154 | AZGP1    | NM_001185.2 | 563    | -1.1474 | -6.1649 | -5.2778 | -4.197 |
| ILMN_1714446 | PLG      | NM_000301.1 | 5340   | -1.5173 | -6.2575 | -4.8527 | -4.209 |
| ILMN_1670779 | DPEP1    | NM_004413.2 | 1800   | -1.5257 | -5.7773 | -5.398  | -4.234 |
| ILMN_2390017 | SLC22A6  | NM_004790.3 | 9356   | -1.6881 | -5.9987 | -5.1495 | -4.279 |
| ILMN_1743357 | XPNPEP2  | NM_003399.5 | 7512   | -1.8813 | -6.2042 | -5.3321 | -4.473 |
| ILMN_1693270 | SUSD2    | NM_019601.3 | 56241  | -2.1805 | -5.866  | -5.6375 | -4.561 |
| ILMN_2167252 | C1orf179 | NM_176782.1 | 338094 | -1.6187 | -5.997  | -6.2087 | -4.608 |
| ILMN_2167259 | C1orf179 | NM_176782.1 | 338094 | -2.6334 | -6.0314 | -6.2754 | -4.980 |
