# Supplementary material
Source: PubMed Central journal article supplement (PMC3070548)
Supplement: mmc6.pdf [file mmc6.pdf]

**Supplemental Table 3A. GSEA applying the c50 gene set collection.**

| NAME                                                                            | SIZE | ES          | NES        | NOM p-val  | FDR q-val  | FWER p-val | RANK AT MA LEADING EDGE             |
|---------------------------------------------------------------------------------|------|-------------|------------|------------|------------|------------|-------------------------------------|
| HYDROLASE_ACTIVITY_HYDROLYZING_O_GLYCOSYL_COMPOUNDS                             | 36   | -0.7818106  | -2.3272913 | 0          | 0          | 0          | 2401 tags=47%, list=10%, signal=52% |
| SECONDARY_ACTIVE_TRANSMEMBRANE_TRANSPORTER_ACTIVITY                             | 19   | 0.5832817   | 2.110089   | 0          | 3.52E-04   | 0.001      | 1575 tags=32%, list=16%, signal=24% |
| HYDROLASE_ACTIVITY_ACTING_ON_GLYCOSYL_BONDS                                     | 46   | -0.6652442  | -2.0428782 | 0          | 0.00165886 | 0.007      | 2526 tags=39%, list=10%, signal=43% |
| ANION_TRANSMEMBRANE_TRANSPORTER_ACTIVITY                                        | 58   | -0.6233542  | -2.01222   | 0          | 0.00317833 | 0.018      | 1575 tags=24%, list=6%, signal=26%  |
| SERINE_HYDROLASE_ACTIVITY                                                       | 44   | -0.65078    | -1.9707515 | 0          | 0.00605632 | 0.043      | 3403 tags=39%, list=14%, signal=45% |
| PROTEIN_AMINO_ACID_N_LINKED_GLYCOSYLATION                                       | 29   | -0.6939393  | -1.9522053 | 0          | 0.00649    | 0.053      | 4507 tags=55%, list=18%, signal=47% |
| LIPOPROTEIN_METABOLIC_PROCESS                                                   | 33   | -0.6846137  | -1.9355763 | 0          | 0.00665399 | 0.066      | 3172 tags=55%, list=13%, signal=62% |
| SERINE_TYPE_PEPTIDASE_ACTIVITY                                                  | 43   | -0.644798   | -1.9307067 | 0          | 0.00643396 | 0.072      | 3403 tags=37%, list=14%, signal=43% |
| SYMPTOTIC_ACTIVITY                                                              | 31   | -0.6842871  | -1.9233667 | 0          | 0.00651516 | 0.082      | 1575 tags=32%, list=6%, signal=34%  |
| SERINE_TYPE_ENDOPEPTIDASE_ACTIVITY                                              | 39   | -0.6136697  | -1.858553  | 0          | 0.01272433 | 0.222      | 3403 tags=36%, list=14%, signal=41% |
| VACUOLE_ORGANIZATION_AND_BIOGENESIS                                             | 12   | 0.8189157   | 1.8324671  | 0          | 0.02408944 | 0.321      | 2481 tags=58%, list=10%, signal=65% |
| SOLUTE_SODIUM_SYMPTOTIC_ACTIVITY                                                | 13   | -0.8047919  | -1.8193982 | 0.00410678 | 0.02721026 | 0.384      | 351 tags=31%, list=1%, signal=31%   |
| LIPOPROTEIN_BIOSYNTHETIC_PROCESS                                                | 26   | -0.6720095  | -1.806974  | 0.00200803 | 0.03107003 | 0.46       | 3172 tags=54%, list=13%, signal=62% |
| EXTERNAL_SIDE_OF_PLASMA_MEMBRANE                                                | 16   | -0.733018   | -1.8014957 | 0.00205761 | 0.03104012 | 0.485      | 3281 tags=56%, list=13%, signal=65% |
| VITAMIN_TRANSPORT                                                               | 13   | -0.7521377  | -1.7996009 | 0          | 0.02905031 | 0.497      | 1424 tags=38%, list=6%, signal=41%  |
| LYSOSOME_ORGANIZATION_AND_BIOGENESIS                                            | 11   | -0.8307377  | -1.796958  | 0          | 0.02897762 | 0.511      | 2481 tags=64%, list=10%, signal=71% |
| PHOSPHATE_TRANSMEMBRANE_TRANSPORTER_ACTIVITY                                    | 13   | -0.7694588  | -1.7954001 | 0          | 0.02790158 | 0.52       | 124 tags=31%, list=0%, signal=31%   |
| ORGANIC_ANION_TRANSMEMBRANE_TRANSPORTER_ACTIVITY                                | 10   | -0.8356974  | -1.7939773 | 0.00217865 | 0.02710548 | 0.53       | 1256 tags=50%, list=5%, signal=53%  |
| RESPONSE_TO_XENOBIOTIC_STIMULUS                                                 | 12   | -0.8045701  | -1.7755631 | 0          | 0.03314576 | 0.609      | 2408 tags=42%, list=10%, signal=46% |
| ANION_TRANSPORT                                                                 | 31   | -0.623848   | -1.7639052 | 0.00431035 | 0.03786528 | 0.691      | 1832 tags=23%, list=7%, signal=24%  |
| XENOBIOTIC_METABOLIC_PROCESS                                                    | 11   | -0.808131   | -1.7562022 | 0.00205761 | 0.03970722 | 0.716      | 2408 tags=45%, list=10%, signal=50% |
| INORGANIC_ANION_TRANSMEMBRANE_TRANSPORTER_ACTIVITY                              | 19   | -0.690707   | -1.7445287 | 0.00198807 | 0.04531192 | 0.766      | 1575 tags=26%, list=6%, signal=28%  |
| RNA_PROCESSING                                                                  | 163  | 0.66806895  | 2.3943808  | 0          | 0          | 0          | 5902 tags=69%, list=23%, signal=59% |
| RNA_BINDING                                                                     | 250  | 0.63021153  | 2.3583093  | 0          | 0          | 0          | 5626 tags=57%, list=22%, signal=72% |
| RNA_SPLICING                                                                    | 90   | 0.6980362   | 2.3115022  | 0          | 0          | 0          | 5853 tags=72%, list=23%, signal=94% |
| TRANSCRIPTION_COREPRESSOR_ACTIVITY                                              | 91   | 0.69408065  | 2.2987466  | 0          | 0          | 0          | 3893 tags=51%, list=15%, signal=60% |
| VACUOLE_ORGANIZATION_AND_BIOGENESIS                                             | 218  | 0.6102208   | 2.2684004  | 0          | 0          | 0          | 4025 tags=42%, list=15%, signal=47% |
| NUCLEOLUS                                                                       | 55   | 0.67594456  | 2.2569606  | 0          | 0          | 0          | 4534 tags=50%, list=18%, signal=61% |
| TRANSCRIPTION_FACTOR_BINDING                                                    | 199  | 0.5925111   | 2.2406206  | 0          | 0          | 0          | 4045 tags=40%, list=16%, signal=47% |
| PORE_COMPLEX                                                                    | 35   | 0.7798341   | 2.205133   | 0          | 0          | 0          | 2644 tags=57%, list=11%, signal=64% |
| TRANSCRIPTION_REPRESSOR_ACTIVITY                                                | 148  | 0.6263889   | 2.2047886  | 0          | 0          | 0          | 3936 tags=43%, list=17%, signal=50% |
| NUCLEAR_LUMEN                                                                   | 366  | 0.56409633  | 2.1808102  | 0          | 0          | 0          | 5911 tags=52%, list=23%, signal=67% |
| NUCLEAR_PORE                                                                    | 30   | 0.7835675   | 2.1551075  | 0          | 0          | 0          | 2644 tags=60%, list=11%, signal=67% |
| TRANSCRIPTION_FROM_RNA_POLYMERASE_II_PROMOTER                                   | 437  | 0.5491339   | 2.1494484  | 0          | 0          | 0          | 5450 tags=45%, list=22%, signal=56% |
| NUCLEAR_ENVELOPE                                                                | 71   | 0.6595207   | 2.0862968  | 0          | 1.90E-04   | 0.007      | 4887 tags=58%, list=19%, signal=72% |
| MRNA_METABOLIC_PROCESS                                                          | 83   | 0.64272845  | 2.0901098  | 0          | 1.76E-04   | 0.002      | 5953 tags=69%, list=24%, signal=80% |
| GUANYL_NUCLEOTIDE_BINDING                                                       | 45   | 0.69481     | 2.0835226  | 0          | 2.47E-04   | 0.003      | 3899 tags=51%, list=15%, signal=60% |
| NUCLEAR_MEMBRANE                                                                | 48   | 0.6864833   | 2.0745378  | 0          | 2.31E-04   | 0.003      | 4301 tags=58%, list=17%, signal=70% |
| REGULATION_OF_TRANSCRIPTION_FROM_RNA_POLYMERASE_II_PROMOTER                     | 277  | 0.54532353  | 2.05615    | 0          | 2.89E-04   | 0.004      | 5730 tags=41%, list=13%, signal=44% |
| MRNA_PROCESSING_GO_0006397                                                      | 72   | 0.634495    | 2.0523233  | 0          | 3.41E-04   | 0.005      | 5730 tags=65%, list=23%, signal=84% |
| ORGANELLE_LUMEN                                                                 | 433  | 0.5203779   | 2.0422518  | 0          | 4.56E-04   | 0.007      | 5911 tags=49%, list=23%, signal=63% |
| RIBONUCLEOPROTEIN_COMPLEX_BIOGENESIS_AND_ASSEMBLY                               | 82   | 0.6187583   | 2.042169   | 0          | 4.33E-04   | 0.007      | 6108 tags=65%, list=24%, signal=85% |
| PROTEIN_IMPORT_INTU_NUCLEUS                                                     | 47   | 0.67849275  | 2.0390773  | 0          | 4.13E-04   | 0.007      | 3787 tags=49%, list=15%, signal=58% |
| ACTIN_BINDING                                                                   | 74   | 0.62539816  | 2.0357542  | 0          | 4.49E-04   | 0.008      | 3875 tags=41%, list=15%, signal=47% |
| MEMBRANE_ENCLOSED_LUMEN                                                         | 433  | 0.5203779   | 2.034907   | 0          | 4.30E-04   | 0.008      | 5911 tags=49%, list=23%, signal=63% |
| GTASE_ACTIVITY                                                                  | 95   | 0.6132628   | 2.0327487  | 0          | 4.12E-04   | 0.008      | 4057 tags=47%, list=16%, signal=56% |
| TRANSLATION_REGULATOR_ACTIVITY                                                  | 38   | 0.6997347   | 2.0315475  | 0          | 3.96E-04   | 0.008      | 4195 tags=53%, list=17%, signal=63% |
| GTP_BINDING                                                                     | 44   | 0.6892012   | 2.028071   | 0          | 3.80E-04   | 0.008      | 3899 tags=50%, list=17%, signal=59% |
| NUCLEAR_TRANSPORT                                                               | 87   | 0.61596495  | 2.0280452  | 0          | 3.66E-04   | 0.008      | 4405 tags=47%, list=18%, signal=57% |
| NUCLEOSIDE_TRIPHOSPHATASE_ACTIVITY                                              | 208  | 0.5512815   | 2.0264     | 0          | 3.53E-04   | 0.008      | 4160 tags=39%, list=17%, signal=47% |
| ACTIN_FILAMENT_BASED_PROCESS                                                    | 115  | 0.5872516   | 2.020275   | 0          | 4.26E-04   | 0.01       | 3642 tags=38%, list=14%, signal=45% |
| NUCLEOCYTOPLASMIC_TRANSPORT                                                     | 86   | 0.61631786  | 2.0218469  | 0          | 4.12E-04   | 0.01       | 4405 tags=48%, list=18%, signal=58% |
| NUCLEOPLASM                                                                     | 265  | 0.5342159   | 2.019855   | 0          | 3.98E-04   | 0.01       | 5911 tags=49%, list=23%, signal=63% |
| ACTIN_FILAMENT_BINDING                                                          | 24   | 0.76924264  | 2.018626   | 0          | 4.25E-04   | 0.011      | 1715 tags=50%, list=7%, signal=54%  |
| TRANSLATION_FACTOR_ACTIVITY_NUCLEIC_ACID_BINDING                                | 36   | 0.7002386   | 2.0044525  | 0          | 5.22E-04   | 0.014      | 4195 tags=53%, list=17%, signal=63% |
| ACTIN_CYTOSKELETON_ORGANIZATION_AND_BIOGENESIS                                  | 405  | 0.5889319   | 2.004237   | 0          | 5.07E-04   | 0.014      | 3642 tags=38%, list=14%, signal=45% |
| NUCLEAR_IMPORT                                                                  | 48   | 0.6656467   | 1.9970423  | 0          | 4.92E-04   | 0.014      | 3787 tags=48%, list=15%, signal=56% |
| POSITIVE_REGULATION_OF_TRANSCRIPTION                                            | 134  | 0.56656206  | 1.9961027  | 0          | 4.79E-04   | 0.014      | 4626 tags=41%, list=18%, signal=50% |
| RIBONUCLEOPROTEIN_COMPLEX                                                       | 134  | 0.56868994  | 1.9918624  | 0          | 4.66E-04   | 0.014      | 5730 tags=60%, list=23%, signal=77% |
| POSITIVE_REGULATION_OF_TRANSCRIPTION_FACTOR_ACTIVITY_ENHANCER_BINDING           | 147  | 0.56868994  | 1.9918624  | 0          | 4.66E-04   | 0.014      | 4626 tags=41%, list=18%, signal=50% |
| TRANSCRIPTION_ACTIVATOR_ACTIVITY                                                | 163  | 0.55086055  | 1.9854473  | 0          | 4.73E-04   | 0.015      | 4051 tags=36%, list=16%, signal=42% |
| TRANSCRIPTION_COACTIVATOR_ACTIVITY                                              | 117  | 0.5699695   | 1.982755   | 0          | 5.24E-04   | 0.017      | 5077 tags=44%, list=20%, signal=55% |
| REGULATION_OF_TRANSCRIPTION_DNA_DEPENDENT                                       | 442  | 0.50198656  | 1.9674488  | 0          | 6.28E-04   | 0.021      | 4628 tags=36%, list=18%, signal=43% |
| RNA_POLYMERASE_II_TRANSCRIPTION_FACTOR_ACTIVITY_ENHANCER_BINDING                | 13   | 0.86638893  | 1.9484838  | 0          | 7.61E-04   | 0.026      | 2338 tags=54%, list=19%, signal=64% |
| REGULATION_OF_RNA_METABOLIC_PROCESS                                             | 452  | 0.49975836  | 1.9549747  | 0          | 7.43E-04   | 0.026      | 4628 tags=36%, list=18%, signal=43% |
| TRANSCRIPTION_FACTOR_ACTIVITY                                                   | 342  | 0.5124872   | 1.954919   | 0          | 7.26E-04   | 0.026      | 4051 tags=33%, list=16%, signal=39% |
| POSITIVE_REGULATION_OF_RNA_METABOLIC_PROCESS                                    | 111  | 0.56551677  | 1.9543072  | 0          | 7.10E-04   | 0.026      | 4626 tags=43%, list=18%, signal=53% |
| ACID_AMINO_ACID_LIGASE_ACTIVITY                                                 | 53   | 0.6471464   | 1.9469594  | 0          | 8.00E-04   | 0.03       | 2949 tags=34%, list=13%, signal=37% |
| NUCLEAR_MEMBRANE_PART                                                           | 40   | 0.68149596  | 1.9384768  | 0          | 0.00109803 | 0.042      | 2644 tags=48%, list=11%, signal=53% |
| NEGATIVE_REGULATION_OF_CELLULAR_METABOLIC_PROCESS                               | 255  | 0.5132503   | 1.9384344  | 0          | 0.00107515 | 0.042      | 4175 tags=32%, list=17%, signal=38% |
| POSITIVE_REGULATION_OF_TRANSCRIPTION_FROM_RNA_POLYMERASE_II_PROMOTER            | 61   | 0.6252675   | 1.9334099  | 0          | 0.001104   | 0.044      | 5043 tags=54%, list=20%, signal=67% |
| SPICEOSOME                                                                      | 47   | 0.6489944   | 1.9226964  | 0          | 0.0012921  | 0.054      | 5853 tags=68%, list=23%, signal=89% |
| LIGASE_ACTIVITY_FORMING_CARBON_NITROGEN_BONDS                                   | 63   | 0.6132146   | 1.9216945  | 0          | 0.00132738 | 0.057      | 3328 tags=40%, list=11%, signal=42% |
| PROTEIN_IMPORT                                                                  | 61   | 0.6065001   | 1.921541   | 0          | 0.00130185 | 0.055      | 3787 tags=43%, list=15%, signal=50% |
| PROTEIN_CATABOLIC_PROCESS                                                       | 64   | 0.6054251   | 1.920337   | 0          | 0.00137141 | 0.058      | 5189 tags=50%, list=21%, signal=63% |
| BIOPOLYMER_CATABOLIC_PROCESS                                                    | 111  | 0.56017154  | 1.9153201  | 0          | 0.00139178 | 0.06       | 4771 tags=43%, list=18%, signal=53% |
| NEGATIVE_REGULATION_OF_TRANSCRIPTION                                            | 258  | 0.5121492   | 1.9148763  | 0          | 0.00146647 | 0.06       | 4175 tags=32%, list=17%, signal=38% |
| POSITIVE_REGULATION_OF_TRANSCRIPTION_DNA_DEPENDENT                              | 109  | 0.5629965   | 1.9146554  | 0          | 0.00136443 | 0.061      | 4626 tags=43%, list=18%, signal=53% |
| TRANSLATION_INITIATION_FACTOR_ACTIVITY                                          | 21   | 0.7445266   | 1.9114094  | 0          | 0.00142881 | 0.064      | 3648 tags=62%, list=15%, signal=72% |
| NUCLEOPLASM_PART                                                                | 200  | 0.5221997   | 1.9109613  | 0          | 0.00142647 | 0.065      | 6750 tags=60%, list=27%, signal=81% |
| PROGRAMMED_CELL_DEATH                                                           | 426  | 0.479131426 | 1.9058014  | 0          | 0.00152209 | 0.072      | 4465 tags=39%, list=14%, signal=46% |
| ANTI_APOPTOSIS                                                                  | 118  | 0.54956144  | 1.9045958  | 0          | 0.00152209 | 0.072      | 3642 tags=40%, list=14%, signal=46% |
| INTRACELLULAR_TRANSPORT                                                         | 274  | 0.4987926   | 1.9038053  | 0          | 0.00149713 | 0.072      | 4669 tags=45%, list=19%, signal=54% |
| COATED_MEMBRANE                                                                 | 17   | 0.7801006   | 1.8995547  | 0          | 0.00167408 | 0.081      | 3361 tags=65%, list=13%, signal=75% |
| NEGATIVE_REGULATION_OF_TRANSCRIPTION                                            | 184  | 0.5206655   | 1.8978016  | 0          | 0.00172662 | 0.081      | 3936 tags=42%, list=17%, signal=49% |
| MEMBRANE_COAT                                                                   | 17   | 0.7801006   | 1.8942058  | 0.00382409 | 0.00189222 | 0.093      | 3361 tags=65%, list=13%, signal=75% |
| EPIDERMAL_GROWTH_FACTOR_RECEPTOR_SIGNALING_PATHWAY                              | 22   | 0.7422032   | 1.8926259  | 0          | 0.00193962 | 0.097      | 4707 tags=64%, list=19%, signal=78% |
| CELL_CORTEX                                                                     | 38   | 0.6514672   | 1.8920581  | 0          | 0.00192993 | 0.098      | 3275 tags=39%, list=13%, signal=45% |
| PHOSPHATASE_REGULATOR_ACTIVITY                                                  | 26   | 0.728365    | 1.8916659  | 0          | 0.00191991 | 0.1        | 3187 tags=38%, list=13%, signal=44% |
| SMALL_CONJUGATING_PROTEIN_LIGASE_ACTIVITY                                       | 47   | 0.6409029   | 1.8887342  | 0          | 0.0020173  | 0.104      | 4405 tags=40%, list=19%, signal=49% |
| CELLULAR_PROTEIN_CATABOLIC_PROCESS                                              | 54   | 0.61853707  | 1.8843225  | 0          | 0.00211327 | 0.109      | 5189 tags=52%, list=21%, signal=65% |
| COATED_VESICLE_MEMBRANE                                                         | 17   | 0.77576977  | 1.8840735  | 0          | 0.00208308 | 0.109      | 3361 tags=65%, list=13%, signal=75% |
| APOPTOSIS_GO                                                                    | 425  | 0.47921574  | 1.8825123  | 0          | 0.00210461 | 0.11       | 4465 tags=39%, list=14%, signal=46% |
| RNA_SPLICING_VIA_TRANSESTERIFICATION_REACTIONS                                  | 36   | 0.6637179   | 1.8813045  | 0          | 0.00219635 | 0.119      | 6408 tags=69%, list=25%, signal=93% |
| PROTEASOME_COMPLEX                                                              | 23   | 0.7255346   | 1.8807669  | 0          | 0.00218359 | 0.12       | 5162 tags=70%, list=21%, signal=87% |
| SMALL_PROTEIN_CONJUGATING_ENZYME_ACTIVITY                                       | 48   | 0.6231962   | 1.8799707  | 0          | 0.00220655 | 0.123      | 4405 tags=38%, list=18%, signal=45% |
| PYROPHOSPHATASE_ACTIVITY                                                        | 222  | 0.5941575   | 1.8781575  | 0          | 0.0024251  | 0.137      | 4160 tags=37%, list=13%, signal=42% |
| RESPONSE_TO_HYPOXIA                                                             | 28   | 0.68349457  | 1.8721696  | 0          | 0.00250645 | 0.144      | 2704 tags=46%, list=11%, signal=42% |
| NEGATIVE_REGULATION_OF_NUCLEOSIDE_NUCLEOTIDE_AND_NUCLEIC_ACID_METABOLIC_PROCESS | 207  | 0.5129136   | 1.8721144  | 0          | 0.0024739  | 0.144      | 4706 tags=36%, list=19%, signal=44% |
| REGULATION_OF_CELL_CYCLE                                                        | 180  | 0.5172228   | 1.8715239  | 0          | 0.00247415 | 0.146      | 5498 tags=40%, list=22%, signal=51% |
| TRANSCRIPTION_FACTOR_COMPLEX                                                    | 84   | 0.5727531   | 1.8693227  | 0          | 0.00253574 | 0.151      | 5901 tags=57%, list=23%, signal=74% |
| RNA_POLYMERASE_II_TRANSCRIPTION_FACTOR_ACTIVITY                                 | 224  | 0.5180028   | 1.8689319  | 0          | 0.0026703  | 0.16       | 4626 tags=38%, list=19%, signal=47% |
| HYDROLASE_ACTIVITY_ACTING_ON_ACID_ANHYDRIDES                                    | 224  | 0.5013533   | 1.8612367  | 0          | 0.0028543  | 0.173      | 4160 tags=37%, list=17%, signal=44% |
| REGULATION_OF_BINDING                                                           | 57   | 0.6059332   | 1.859686   | 0          | 0.00295512 | 0.179      | 4151 tags=40%, list=17%, signal=48% |
| GENERAL_RNA_POLYMERASE_II_TRANSCRIPTION_FACTOR_ACTIVITY                         | 26   | 0.6829526   | 1.8581302  | 0.00187266 | 0.00302059 | 0.186      | 5787 tags=73%, list=23%, signal=95% |
| REGULATION_OF_PROGRAMMED_CELL_DEATH                                             | 336  | 0.48026854  | 1.855862   | 0          | 0.0032015  | 0.192      | 5039 tags=44%, list=20%, signal=52% |
| PURINE_RIBONUCLEOTIDE_BINDING                                                   | 202  | 0.50456524  | 1.8525562  | 0          | 0.00336024 | 0.205      | 4828 tags=38%, list=19%, signal=46% |
| LIGASE_ACTIVITY                                                                 | 92   | 0.55863476  | 1.8439981  | 0          | 0.00385178 | 0.232      | 4902 tags=46%, list=19%, signal=56% |
| PHOSPHOPROTEIN_PHOSPHATASE_ACTIVITY                                             | 81   | 0.56833035  | 1.8439037  | 0          | 0.00382135 | 0.232      | 4146 tags=36%, list=16%, signal=43% |
| NEGATIVE_REGULATION_OF_PROGRAMMED_CELL_DEATH                                    | 151  | 0.5142237   | 1.8437221  | 0          | 0.00377792 | 0.232      | 4151 tags=42%, list=17%, signal=50% |
| REGULATION_OF_APOPTOSIS                                                         | 335  | 0.4803715   | 1.8423828  | 0          | 0.00380495 | 0.236      | 5040 tags=44%, list=20%, signal=55% |
| PROTEIN_TYROSINE_PHOSPHATASE_ACTIVITY                                           | 53   | 0.6065121   | 1.8422935  | 0          | 0.00376268 | 0.236      | 4146 tags=40%, list=16%, signal=47% |
| HELICASE_ACTIVITY                                                               | 51   | 0.6099546   | 1.8420389  | 0          | 0.00374842 | 0.238      | 4160 tags=43%, list=17%, signal=52% |
| UBIQUITIN_PROTEIN_LIGASE_ACTIVITY                                               | 45   | 0.62401825  | 1.8393803  | 0.00182149 | 0.00380828 | 0.245      |                                     |

|                                                                          |     |             |           |            |             |        |      |                                 |
|--------------------------------------------------------------------------|-----|-------------|-----------|------------|-------------|--------|------|---------------------------------|
| RIBOSOME_BIOGENESIS_AND_ASSEMBLY                                         | 17  | 0.73755115  | 1.7818667 | 0          | 0.00712137  | 0.515  | 5582 | tags=82%, list=22%, signal=106% |
| INTERMEDIATE_FILAMENT                                                    | 23  | 0.6893677   | 1.78      | 0.0019084  | 0.00730321  | 0.527  | 317  | tags=17%, list=1%, signal=18%   |
| PERINUCLEAR_REGION_OF_CYTOSOL                                            | 53  | 0.5791448   | 1.7777379 | 0          | 0.541       | 0.541  | 2901 | tags=32%, list=1%, signal=32%   |
| RNA_SPLICING_FACTOR_ACTIVITY_TRANSESTERIFICATION_MECHANISM               | 19  | 0.71132755  | 1.773919  | 0          | 0.0079421   | 0.569  | 5626 | tags=74%, list=22%, signal=95%  |
| KINASE_BINDING                                                           | 69  | 0.5502214   | 1.7727478 | 0          | 0.0080038   | 0.573  | 4208 | tags=39%, list=17%, signal=47%  |
| SMALL_NUCLEAR_RIBONUCLEOPROTEIN_COMPLEX                                  | 21  | 0.69443214  | 1.7711582 | 0          | 0.00816368  | 0.583  | 5730 | tags=76%, list=23%, signal=99%  |
| REGULATION_OF_TRANSFORMING_GROWTH_FACTOR_BETA_RECEPTOR_SIGNALING_PATHWAY | 14  | 0.7657647   | 1.7662617 | 0.00204918 | 0.5931      | 0.5931 | 2593 | tags=29%, list=18%, signal=32%  |
| I_KAPPAB_KINASE_NF_KAPPAB_CASCADE                                        | 112 | 0.5110772   | 1.7683724 | 0          | 0.00838817  | 0.6    | 4699 | tags=46%, list=19%, signal=74%  |
| REGULATION_OF_MITOTIC_CELL_CYCLE                                         | 22  | 0.681358    | 1.7682081 | 0.0035524  | 0.00836288  | 0.601  | 819  | tags=23%, list=3%, signal=23%   |
| MYOBLAST_DIFFERENTIATION                                                 | 17  | 0.7306395   | 1.7670319 | 0.00575816 | 0.00840922  | 0.608  | 2024 | tags=24%, list=15%, signal=26%  |
| INTERMEDIATE_FILAMENT_CYTOSKELETON                                       | 23  | 0.6893677   | 1.7667463 | 0          | 0.00836654  | 0.608  | 317  | tags=17%, list=1%, signal=18%   |
| DEPHOSPHORYLATION                                                        | 70  | 0.5492232   | 1.7667086 | 0          | 0.00830678  | 0.608  | 4808 | tags=37%, list=8%, signal=46%   |
| TRANSLATION                                                              | 176 | 0.49123588  | 1.7666426 | 0          | 0.00828283  | 0.61   | 5354 | tags=44%, list=21%, signal=56%  |
| BASOLATERAL_PLASMA_MEMBRANE                                              | 34  | 0.6284349   | 1.7619641 | 0.00182815 | 0.0089042   | 0.645  | 2597 | tags=41%, list=10%, signal=46%  |
| RAS_GTPASE_BINDING                                                       | 24  | 0.67355413  | 1.760394  | 0.00184843 | 0.00904767  | 0.658  | 3165 | tags=50%, list=13%, signal=57%  |
| NEGATIVE_REGULATION_OF_PROTEIN_METABOLIC_PROCESS                         | 48  | 0.5902538   | 1.760033  | 0          | 0.00906137  | 0.66   | 2046 | tags=27%, list=8%, signal=29%   |
| REGULATION_OF_PROTEIN_KINASE_ACTIVITY                                    | 155 | 0.49002585  | 1.7598573 | 0          | 0.0090165   | 0.66   | 4585 | tags=38%, list=18%, signal=46%  |
| CYTOPLASMIC_VESICLE_MEMBRANE                                             | 28  | 0.6587035   | 1.7597169 | 0          | 0.00898771  | 0.661  | 3768 | tags=54%, list=15%, signal=63%  |
| MUSCLE_CELL_DIFFERENTIATION                                              | 22  | 0.6882146   | 1.7596041 | 0.00375235 | 0.00894381  | 0.661  | 2024 | tags=18%, list=8%, signal=20%   |
| NEGATIVE_REGULATION_OF_TRANSCRIPTION_FROM_RNA_POLYMERASE_II_PROMOTER     | 24  | 0.54279786  | 1.7587075 | 0          | 0.00898411  | 0.665  | 5989 | tags=50%, list=24%, signal=65%  |
| RNA_HELICASE_ACTIVITY                                                    | 24  | 0.6714373   | 1.7580432 | 0.00185529 | 0.00899769  | 0.668  | 3757 | tags=46%, list=15%, signal=54%  |
| MOTOR_ACTIVITY                                                           | 27  | 0.6605231   | 1.7562097 | 0          | 0.00921011  | 0.681  | 3373 | tags=30%, list=13%, signal=34%  |
| CYTOSKELETON_ORGANIZATION_AND_BIOGENESIS                                 | 205 | 0.4684762   | 1.752743  | 0          | 0.00969033  | 0.701  | 3819 | tags=31%, list=15%, signal=36%  |
| CELL_JUNCTION                                                            | 80  | 0.5495836   | 1.7509701 | 0          | 0.00968687  | 0.712  | 2618 | tags=31%, list=10%, signal=35%  |
| ENDOSOME_TRANSPORT                                                       | 23  | 0.6703815   | 1.7508383 | 0.0018797  | 0.00982084  | 0.714  | 4978 | tags=61%, list=20%, signal=76%  |
| MYELOID_CELL_DIFFERENTIATION                                             | 37  | 0.6201245   | 1.747451  | 0.0018018  | 0.1026292   | 0.73   | 1717 | tags=30%, list=7%, signal=32%   |
| ACTIN_CYTOSKELETON                                                       | 125 | 0.5125259   | 1.7471099 | 0          | 0.1023672   | 0.731  | 4652 | tags=38%, list=18%, signal=46%  |
| MYELOID_LEUKOCYTE_DIFFERENTIATION                                        | 15  | 0.74425594  | 1.7404381 | 0          | 0.1023821   | 0.737  | 1717 | tags=27%, list=12%, signal=29%  |
| POSITIVE_REGULATION_OF_CELL_ADHESION                                     | 13  | 0.7546882   | 1.7429764 | 0.00743494 | 0.1085975   | 0.756  | 2855 | tags=38%, list=11%, signal=43%  |
| RNA_PROCESSING                                                           | 14  | 0.755936    | 1.7419138 | 0.00369686 | 0.1094773   | 0.759  | 5582 | tags=86%, list=22%, signal=110% |
| REGULATION_OF_DEVELOPMENTAL_PROCESS                                      | 433 | 0.444731867 | 1.7410092 | 0          | 0.1101895   | 0.76   | 5040 | tags=40%, list=20%, signal=50%  |
| REGULATION_OF_I_KAPPAB_ACTIVITY                                          | 161 | 0.68156694  | 1.7400142 | 0          | 0.111128    | 0.767  | 4585 | tags=37%, list=14%, signal=46%  |
| STRUCTURAL_CONSTITUENT_OF_RIBOSOME                                       | 79  | 0.5363326   | 1.7375906 | 0          | 0.1114186   | 0.776  | 5354 | tags=53%, list=21%, signal=67%  |
| PROTEIN_SERINE_THREONINE_KINASE_ACTIVITY                                 | 203 | 0.47152406  | 1.7320479 | 0          | 0.11226864  | 0.808  | 5316 | tags=40%, list=21%, signal=51%  |
| CYTOPLASMIC_VESICLE_PART                                                 | 28  | 0.6587035   | 1.730718  | 0          | 0.11242117  | 0.816  | 3768 | tags=54%, list=15%, signal=63%  |
| PROTEIN_UBIQUITINATION                                                   | 96  | 0.60410696  | 1.7304559 | 0.00185185 | 0.11242117  | 0.816  | 5121 | tags=42%, list=20%, signal=53%  |
| ENZYME_LINKED_RECEPTOR_PROTEIN_SIGNALING_PATHWAY                         | 139 | 0.4958478   | 1.7301387 | 0          | 0.11233125  | 0.818  | 4768 | tags=34%, list=19%, signal=42%  |
| PROTEIN_MODIFICATION_BY_SMALL_PROTEIN_CONJUGATION                        | 40  | 0.59731305  | 1.7286272 | 0.00194175 | 0.11245047  | 0.822  | 5121 | tags=40%, list=20%, signal=50%  |
| CELLULAR_LOCALIZATION                                                    | 363 | 0.44475338  | 1.7261967 | 0          | 0.1128625   | 0.838  | 4405 | tags=37%, list=18%, signal=45%  |
| RUFFLE                                                                   | 31  | 0.62826893  | 1.7243387 | 0.0035471  | 0.11313773  | 0.843  | 3603 | tags=55%, list=13%, signal=64%  |
| NEGATIVE_REGULATION_OF_GROWTH                                            | 39  | 0.597254    | 1.7223791 | 0.00383142 | 0.1135352   | 0.858  | 2616 | tags=26%, list=10%, signal=29%  |
| REGULATION_OF_KINASE_ACTIVITY                                            | 157 | 0.485185    | 1.7200768 | 0          | 0.11386955  | 0.865  | 4585 | tags=38%, list=18%, signal=46%  |
| LEADING_EDGE                                                             | 47  | 0.5732438   | 1.7193012 | 0          | 0.11386739  | 0.869  | 3611 | tags=47%, list=14%, signal=53%  |
| NEGATIVE_REGULATION_OF_SIGNAL_TRANSDUCTION                               | 124 | 0.49970478  | 1.7170078 | 0          | 0.11429608  | 0.877  | 4699 | tags=44%, list=19%, signal=53%  |
| NUCLEOTIDE_BINDING                                                       | 24  | 0.46371837  | 1.7163544 | 0          | 0.11429893  | 0.879  | 4808 | tags=37%, list=14%, signal=46%  |
| NEGATIVE_REGULATION_OF_PHOSPHATE_METABOLIC_PROCESS                       | 13  | 0.7635427   | 1.7163078 | 0          | 0.11423124  | 0.88   | 2593 | tags=23%, list=10%, signal=26%  |
| INTERPHASE                                                               | 67  | 0.5473161   | 1.7160926 | 0.00172117 | 0.1141709   | 0.88   | 5237 | tags=45%, list=21%, signal=56%  |
| ADP_BINDING                                                              | 11  | 0.805532    | 1.7125686 | 0.00582524 | 0.11467085  | 0.89   | 764  | tags=36%, list=3%, signal=37%   |
| STRUCTURAL_MOLECULE_ACTIVITY                                             | 238 | 0.45567204  | 1.7125509 | 0          | 0.11459472  | 0.89   | 5354 | tags=37%, list=14%, signal=46%  |
| VESICLE_MEDIATED_TRANSPORT                                               | 192 | 0.46760067  | 1.7109    | 0          | 0.11487525  | 0.901  | 4617 | tags=41%, list=18%, signal=50%  |
| ENZYME_BINDING                                                           | 177 | 0.47390518  | 1.7047313 | 0          | 0.11616685  | 0.912  | 4841 | tags=40%, list=19%, signal=49%  |
| UBIQUITIN_BINDING                                                        | 11  | 0.793386    | 1.7041869 | 0.00992064 | 0.1161822   | 0.913  | 4706 | tags=73%, list=19%, signal=89%  |
| REGULATION_OF_CELLULAR_PROTEIN_METABOLIC_PROCESS                         | 157 | 0.47540778  | 1.7037841 | 0          | 0.116093162 | 0.913  | 3033 | tags=26%, list=12%, signal=29%  |
| RNA_EXPORT_FROM_NUCLEUS                                                  | 21  | 0.68699335  | 1.7024788 | 0.00548446 | 0.11629653  | 0.918  | 4897 | tags=52%, list=24%, signal=65%  |
| PROTEIN_TARGETING                                                        | 107 | 0.4986622   | 1.7010429 | 0          | 0.11651056  | 0.921  | 5915 | tags=52%, list=19%, signal=68%  |
| SPLICEOSOME_ASSEMBLY                                                     | 21  | 0.67287517  | 1.6943074 | 0.00770713 | 0.11788654  | 0.944  | 6727 | tags=81%, list=27%, signal=110% |
| REGULATION_OF_I_KAPPAB_KINASE_NF_KAPPAB_CASCADE                          | 92  | 0.50742644  | 1.692683  | 0          | 0.11814281  | 0.947  | 4699 | tags=47%, list=19%, signal=53%  |
| ORGANELLE_ENVELOPE                                                       | 162 | 0.47107145  | 1.6925672 | 0          | 0.11805843  | 0.945  | 5073 | tags=42%, list=20%, signal=52%  |
| STRUCTURAL_CONSTITUENT_OF_CYTOSKELETON                                   | 56  | 0.55482946  | 1.6922483 | 0          | 0.11801387  | 0.946  | 4624 | tags=34%, list=18%, signal=41%  |
| SKELETAL_MUSCLE_DEVELOPMENT                                              | 31  | 0.6197629   | 1.691043  | 0          | 0.11814711  | 0.948  | 3939 | tags=26%, list=16%, signal=31%  |
| NEGATIVE_REGULATION_OF_PHOSPHORYLATION                                   | 12  | 0.77171656  | 1.6902683 | 0.00581139 | 0.11805843  | 0.951  | 2593 | tags=38%, list=16%, signal=42%  |
| NUCLEOLAR_PART                                                           | 17  | 0.7100589   | 1.6867696 | 0.0020202  | 0.11902136  | 0.961  | 5675 | tags=76%, list=23%, signal=99%  |
| ENVELOPE                                                                 | 162 | 0.47107145  | 1.6851894 | 0          | 0.11936823  | 0.964  | 5073 | tags=42%, list=20%, signal=52%  |
| REGULATION_OF_PROTEIN_METABOLIC_PROCESS                                  | 168 | 0.46883237  | 1.6834152 | 0          | 0.11969071  | 0.969  | 3033 | tags=26%, list=12%, signal=29%  |
| RNA_SPLICE_SITE_SELECTION                                                | 13  | 0.7406232   | 1.6823665 | 0.00767754 | 0.11989645  | 0.97   | 4818 | tags=69%, list=19%, signal=89%  |
| APOPTOTIC_PROGRAM                                                        | 59  | 0.5482457   | 1.6818644 | 0.00174825 | 0.11989645  | 0.971  | 4078 | tags=46%, list=15%, signal=50%  |
| REGULATION_OF_CELL_PROLIFERATION                                         | 305 | 0.43899733  | 1.6815057 | 0          | 0.11991339  | 0.972  | 3548 | tags=26%, list=14%, signal=29%  |
| SMALL_CONJUGATING_PROTEIN_BINDING                                        | 12  | 0.7837699   | 1.6783366 | 0.00773694 | 0.12064917  | 0.979  | 4706 | tags=67%, list=19%, signal=82%  |
| INTRACELLULAR_PROTEIN_TRANSPORT                                          | 140 | 0.474151    | 1.6779191 | 0          | 0.1211323   | 0.98   | 4372 | tags=42%, list=17%, signal=49%  |
| RNA_METABOLIC_PROCESS                                                    | 15  | 0.72763216  | 1.67464   | 0.00592885 | 0.12131986  | 0.983  | 5582 | tags=80%, list=22%, signal=103% |
| TRANSMEMBRANE_RECEPTOR_PROTEIN_TYROSINE_KINASE_SIGNALING_PATHWAY         | 83  | 0.50744504  | 1.6742498 | 0          | 0.12133059  | 0.984  | 5736 | tags=46%, list=23%, signal=59%  |
| DNA_DIRECTED_RNA_POLYMERASE_II_HOLOENZYME                                | 59  | 0.53508455  | 1.6741482 | 0          | 0.12124284  | 0.984  | 6181 | tags=61%, list=25%, signal=81%  |
| REGULATION_OF_ACTIN_POLYMERIZATION_AND_OR_DEPOLYMERIZATION               | 12  | 0.7496483   | 1.6720245 | 0.00389105 | 0.12161611  | 0.985  | 2046 | tags=42%, list=8%, signal=45%   |
| ORGANELLE_ORGANIZATION_AND_BIOGENESIS                                    | 468 | 0.4256772   | 1.6714231 | 0          | 0.1216323   | 0.985  | 5322 | tags=38%, list=24%, signal=42%  |
| REGULATION_OF_MOLECULAR_FUNCTION                                         | 321 | 0.4349031   | 1.670624  | 0          | 0.12170806  | 0.985  | 5471 | tags=36%, list=19%, signal=44%  |
| MAGNESIUM_ION_BINDING                                                    | 61  | 0.53271115  | 1.6701593 | 0          | 0.12175904  | 0.985  | 4807 | tags=49%, list=21%, signal=62%  |
| CELL_SUBSTRATE_ADHERENS_JUNCTION                                         | 16  | 0.6898071   | 1.6688787 | 0.00760456 | 0.12195289  | 0.986  | 2266 | tags=50%, list=9%, signal=55%   |
| POSITIVE_REGULATION_OF_DEVELOPMENTAL_PROCESS                             | 214 | 0.45380162  | 1.668456  | 0          | 0.12195289  | 0.986  | 5040 | tags=41%, list=17%, signal=49%  |
| POST_TRANSLATIONAL_PROTEIN_MODIFICATION                                  | 467 | 0.4217418   | 1.6673037 | 0          | 0.12216799  | 0.987  | 4808 | tags=31%, list=19%, signal=38%  |
| CELL_MATRIX_JUNCTION                                                     | 18  | 0.6835925   | 1.6673872 | 0.01115242 | 0.1221324   | 0.987  | 2266 | tags=44%, list=9%, signal=49%   |
| REGULATION_OF_CELLULAR_COMPONENT_ORGANIZATION_AND_BIOGENESIS             | 123 | 0.48482428  | 1.6631851 | 0          | 0.12318821  | 0.992  | 4200 | tags=38%, list=17%, signal=46%  |
| NEGATIVE_REGULATION_OF_CELL_PROLIFERATION                                | 155 | 0.45169675  | 1.6600364 | 0.00164474 | 0.12318821  | 0.993  | 3509 | tags=26%, list=12%, signal=29%  |
| ECTODERM_DEVELOPMENT                                                     | 77  | 0.51529163  | 1.6592292 | 0.00173611 | 0.12414259  | 0.994  | 1665 | tags=18%, list=7%, signal=19%   |
| CYTOSKELETAL_PART                                                        | 227 | 0.44534537  | 1.6591309 | 0          | 0.12408069  | 0.994  | 3592 | tags=25%, list=14%, signal=29%  |
| ATPASE_ACTIVITY                                                          | 112 | 0.48623246  | 1.658787  | 0          | 0.12409508  | 0.994  | 4160 | tags=33%, list=17%, signal=39%  |
| REGULATION_OF_CYTOSKELETON_ORGANIZATION_AND_BIOGENESIS                   | 30  | 0.6087526   | 1.6584681 | 0.01500938 | 0.12404012  | 0.994  | 5890 | tags=50%, list=17%, signal=61%  |
| SECRETORY_PATHWAY                                                        | 81  | 0.5027318   | 1.6538827 | 0          | 0.12518803  | 0.994  | 4604 | tags=38%, list=18%, signal=47%  |
| NEGATIVE_REGULATION_OF_BINDING                                           | 18  | 0.6718733   | 1.6474241 | 0.01071429 | 0.12706049  | 0.994  | 3430 | tags=39%, list=14%, signal=45%  |
| EPIDERMIS_DEVELOPMENT                                                    | 68  | 0.5242307   | 1.6461148 | 0.0016835  | 0.12737961  | 0.994  | 1665 | tags=19%, list=7%, signal=20%   |
| TRANSCRIPTION_INITIATION                                                 | 26  | 0.6223423   | 1.6453327 | 0.00560748 | 0.12737961  | 0.994  | 5040 | tags=39%, list=17%, signal=49%  |
| POSITIVE_REGULATION_OF_TRANSFERASE_ACTIVITY                              | 86  | 0.49842203  | 1.645092  | 0          | 0.12747956  | 0.994  | 4585 | tags=43%, list=18%, signal=52%  |
| GOLGI_VESICLE_TRANSPORT                                                  | 47  | 0.5453441   | 1.6442453 | 0          | 0.12762443  | 0.994  | 4604 | tags=47%, list=18%, signal=57%  |
| MYOFIBRIL                                                                | 19  | 0.6671165   | 1.6400765 | 0.0198915  | 0.12873044  | 0.994  | 599  | tags=26%, list=2%, signal=27%   |
| NEGATIVE_REGULATION_OF_I_KAPPAB_KINASE_NF_KAPPAB_CASCADE                 | 87  | 0.49982587  | 1.6384536 | 0          | 0.12911922  | 0.997  | 4699 | tags=47%, list=19%, signal=53%  |
| REGULATION_OF_CELLULAR_COMPONENT_SIZE                                    | 14  | 0.710642    | 1.6373285 | 0.02004008 | 0.12929874  | 0.995  | 4736 | tags=57%, list=19%, signal=70%  |
| CHROMOSOME                                                               | 121 | 0.46925035  | 1.6353621 | 0          | 0.12997476  | 0.996  | 6068 | tags=45%, list=24%, signal=60%  |
| KINASE_ACTIVATOR_ACTIVITY                                                | 12  | 0.7413255   | 1.6349207 | 0.0131579  | 0.13000614  | 0.996  | 4405 | tags=42%, list=18%, signal=50%  |
| CELLULAR_MACROMOLECULE_CATABOLIC_PROCESS                                 | 99  | 0.4863924   | 1.6345682 | 0.00163132 | 0.13000614  | 0.996  | 1241 | tags=38%, list=17%, signal=45%  |
| MICROTUBULE_BASED_PROCESS                                                | 80  | 0.4909748   | 1.6343658 | 0          | 0.12988763  | 0.996  | 6018 | tags=46%, list=24%, signal=61%  |
| MACROMOLECULE_CATABOLIC_PROCESS                                          | 131 | 0.47005942  | 1.6343257 | 0          | 0.12976746  | 0.996  | 4771 | tags=38%, list=19%, signal=47%  |
| RESPONSE_TO_STRESS                                                       | 499 | 0.4100436   | 1.6333828 | 0          | 0.1299765   | 0.996  | 4177 | tags=30%, list=17%, signal=35%  |
| HEPARIN_BINDING                                                          | 23  | 0.63752514  | 1.6327454 | 0.00722022 | 0.13011075  | 0.996  | 1225 | tags=30%, list=5%, signal=32%   |
| CELL_CORTEX_PART                                                         | 23  | 0.6305011   | 1.6324108 | 0.00910747 | 0.13011075  | 0.996  | 4268 | tags=39%, list=17%, signal=49%  |
| ATP_DEPENDENT_HELICASE_ACTIVITY                                          | 27  | 0.6087      | 1.6307074 | 0.00769231 | 0.13051681  | 0.996  | 6622 | tags=74%, list=26%, signal=100% |
| THYROID_HORMONE_RECEPTOR_BINDING                                         | 12  | 0.7467734   | 1.6305476 | 0.01167315 | 0.13043323  | 0.996  | 3090 | tags=58%, list=12%, signal=66%  |
| MRNA_BINDING                                                             | 23  | 0.6308484   | 1.6291708 | 0.01872659 | 0.13084592  | 0.997  | 4530 | tags=57%, list=18%, signal=69%  |
| APOPTOTIC_NUCLEAR_CHANGES                                                | 19  | 0.6606198   | 1.6276263 |            |             |        |      |                                 |

|                                                      |     |            |           |            |            |   |      |                                |
|------------------------------------------------------|-----|------------|-----------|------------|------------|---|------|--------------------------------|
| RNA_DEPENDENT_ATPASE_ACTIVITY                        | 18  | 0.6381389  | 1.5729166 | 0.02398524 | 0.04583609 | 1 | 3757 | tags=44%, list=15%, signal=52% |
| REGULATION_OF_TRANSPORT                              | 65  | 0.5025823  | 1.5726172 | 0.00503356 | 0.04576074 | 1 | 2949 | tags=26%, list=12%, signal=30% |
| REGULATION_OF_CELL_GROWTH                            | 45  | 0.5397814  | 1.5724726 | 0.00736648 | 0.04559885 | 1 | 4965 | tags=42%, list=20%, signal=53% |
| TRANSLATIONAL_INITIATION                             | 36  | 0.5535418  | 1.5723628 | 0.01088929 | 0.04556055 | 1 | 3648 | tags=42%, list=15%, signal=49% |
| ADENYL_NUCLEOTIDE_BINDING                            | 168 | 0.43307868 | 1.5714543 | 0          | 0.04578682 | 1 | 4768 | tags=35%, list=19%, signal=42% |
| PROTEIN_KINASE_REGULATOR_ACTIVITY                    | 39  | 0.55002505 | 1.5707995 | 0.01974865 | 0.04590825 | 1 | 3653 | tags=28%, list=15%, signal=33% |
| POSITIVE_REGULATION_OF_CASPASE_ACTIVITY              | 28  | 0.5773355  | 1.5697871 | 0.01498127 | 0.04611751 | 1 | 4817 | tags=43%, list=19%, signal=53% |
| REGULATION_OF_NUCLEOCYTOPLASMIC_TRANSPORT            | 12  | 0.61606365 | 1.5697684 | 0.01714286 | 0.04582828 | 1 | 2370 | tags=32%, list=9%, signal=37%  |
| ACTIN_FILAMENT_BUNDLE_FORMATION                      | 12  | 0.7030536  | 1.5690141 | 0.03118908 | 0.04618751 | 1 | 4316 | tags=42%, list=17%, signal=50% |
| PROTEIN_AUTOPROCESSING                               | 32  | 0.56341404 | 1.5690104 | 0.01824817 | 0.04603232 | 1 | 7206 | tags=59%, list=29%, signal=83% |
| STEROID_HORMONE_RECEPTOR_SIGNALING_PATHWAY           | 15  | 0.66526484 | 1.5681324 | 0.02970297 | 0.04624765 | 1 | 3759 | tags=53%, list=15%, signal=63% |
| PURINE_NUCLEOTIDE_METABOLIC_PROCESS                  | 12  | 0.70536537 | 1.5674949 | 0.01890359 | 0.04752604 | 1 | 2432 | tags=44%, list=14%, signal=51% |
| CYTOSKELETON_DEPENDENT_INTRACELLULAR_TRANSPORT       | 26  | 0.6043526  | 1.5667729 | 0.01757469 | 0.04649865 | 1 | 3557 | tags=38%, list=14%, signal=45% |
| UBIQUITIN_LIGASE_COMPLEX                             | 25  | 0.6016522  | 1.5666163 | 0.01289135 | 0.04641552 | 1 | 6709 | tags=52%, list=27%, signal=71% |
| INDUCTION_OF_APOPTOSIS_BY_EXTRACELLULAR_SIGNALS      | 27  | 0.5871265  | 1.5635796 | 0.01778656 | 0.04765374 | 1 | 5040 | tags=52%, list=20%, signal=65% |
| REGULATION_OF_PROTEIN_IMPORT_INTO_NUCLEUS            | 16  | 0.65366715 | 1.5635076 | 0.01890359 | 0.04752604 | 1 | 6068 | tags=47%, list=24%, signal=61% |
| NEGATIVE_REGULATION_OF_TRANSCRIPTION_FACTOR_ACTIVITY | 16  | 0.66493386 | 1.5634167 | 0.02309059 | 0.04739911 | 1 | 3430 | tags=40%, list=14%, signal=46% |
| MEMBRANE_FUSION                                      | 27  | 0.5810604  | 1.5630187 | 0.02281369 | 0.04741807 | 1 | 4516 | tags=48%, list=18%, signal=59% |
| DNA_METABOLIC_PROCESS                                | 251 | 0.41553983 | 1.558799  | 0          | 0.04902728 | 1 | 4247 | tags=26%, list=17%, signal=31% |
| CHROMOSOMAL_PART                                     | 94  | 0.45950308 | 1.5569538 | 0.00338409 | 0.04965719 | 1 | 6068 | tags=47%, list=24%, signal=61% |
| CALCIUM_ION_TRANSMEMBRANE_TRANSPORTER_ACTIVITY       | 11  | 0.7181926  | 1.5564916 | 0.0248566  | 0.04975615 | 1 | 1698 | tags=36%, list=7%, signal=39%  |
| PROTEIN_AMINO_ACID_PHOSPHORYLATION                   | 273 | 0.41239893 | 1.5564026 | 0          | 0.04961956 | 1 | 6318 | tags=42%, list=25%, signal=56% |
| REPLICATION_FORK                                     | 18  | 0.62329714 | 1.555453  | 0.01798561 | 0.04991534 | 1 | 6046 | tags=72%, list=24%, signal=95% |

Supplemental Table 3B. GSEA applying the c2 curated gene sets.

| NAME                                                       | SIZE | ES         | NES        | NOM p-val  | FDR q-val  | FWER p-val | RANK AT MA | LEADING EDGE                   |
|------------------------------------------------------------|------|------------|------------|------------|------------|------------|------------|--------------------------------|
| HCC_SURVIVAL_GOOD_VS_POOR_UP                               | 139  | -0.6216995 | -2.2713902 | 0          | 0          | 0          | 3947       | tags=44%, list=16%, signal=52% |
| HSIAO_LIVER_SPECIFIC_GENES                                 | 248  | -0.5581823 | -2.1965322 | 0          | 0          | 0          | 3956       | tags=38%, list=16%, signal=44% |
| SANSOM_APC_5_DN                                            | 330  | -0.5329908 | -2.156622  | 0          | 0          | 0          | 2646       | tags=29%, list=11%, signal=32% |
| HSIAO1032_GLYCAN_STRUCTURES_DEGRADATION                    | 66   | -0.758944  | -1.8141038 | 0          | 0.00510864 | 0.161      | 2217       | tags=53%, list=19%, signal=61% |
| HSIAO0511_N_GLYCAN_DEGRADATION                             | 16   | -0.8259946 | -2.0183804 | 0          | 0.00101479 | 0.015      | 4169       | tags=81%, list=17%, signal=97% |
| HSIAO0040_PENTOSE_AND_GLUCONATE_INTERCONVERSIONS           | 25   | -0.7428018 | -2.0083268 | 0          | 9.01E-04   | 0.016      | 678        | tags=40%, list=3%, signal=41%  |
| HSIAO4612_ANTIGEN_PROCESSING_AND_PRESENTATION              | 81   | -0.5766249 | -1.9629775 | 0          | 0.0019349  | 0.038      | 5665       | tags=49%, list=23%, signal=64% |
| HSIAO0563_GLYCOSYLPHOSPHATIDYLINOSITOL_ANCHOR_BIOSYNTHESIS | 23   | -0.7295217 | -1.9572638 | 0.00214592 | 0.00194673 | 0.227      | 2918       | tags=57%, list=17%, signal=50% |
| HSIAO0480_GLUTATHIONE_METABOLISM                           | 39   | -0.6544321 | -1.9483595 | 0          | 0.00206639 | 0.053      | 1452       | tags=36%, list=6%, signal=38%  |
| FETAL_LIVER_VS_ADULT_LIVER_GNF2                            | 70   | -0.5900008 | -1.9416324 | 0          | 0.00202713 | 0.057      | 4168       | tags=41%, list=17%, signal=50% |
| HSIAO1031_GLYCAN_METABOLISM_BIOSYNTHESIS_2                 | 61   | -0.5881043 | -1.8783379 | 0          | 0.00511191 | 0.149      | 2918       | tags=39%, list=12%, signal=44% |
| LEE_DENA_DN                                                | 74   | -0.5612781 | -1.8781846 | 0          | 0.00510864 | 0.161      | 4401       | tags=36%, list=18%, signal=49% |
| HSIAO4940_TYPE_1_DIABETES_MELLITUS                         | 44   | -0.6025201 | -1.8685457 | 0          | 0.00495361 | 0.169      | 2330       | tags=34%, list=19%, signal=38% |
| HSIAO0980_METABOLISM_OF_XENOBIOTICS_BY_CYTOCHROME_P450     | 70   | -0.5630037 | -1.8664087 | 0          | 0.00471974 | 0.174      | 902        | tags=21%, list=6%, signal=22%  |
| HSIAO0860_PORPHYRIN_AND_XANTHOPHYLL_METABOLISM             | 40   | -0.6289949 | -1.8601896 | 0          | 0.0048141  | 0.185      | 1547       | tags=28%, list=6%, signal=29%  |
| APPEL_IMATINIB_UP                                          | 31   | -0.6387288 | -1.8467257 | 0.0045977  | 0.00564749 | 0.227      | 4169       | tags=58%, list=17%, signal=70% |
| LEE_CIP_DN                                                 | 66   | -0.5551506 | -1.8370739 | 0          | 0.00624868 | 0.273      | 4487       | tags=36%, list=18%, signal=49% |
| INTRINSIC_PATHWAY                                          | 21   | -0.7046621 | -1.817842  | 0.00224719 | 0.00804175 | 0.352      | 3956       | tags=52%, list=16%, signal=62% |
| HSIAO3320_PPARG_SIGNALING_PATHWAY                          | 68   | -0.5451407 | -1.8175415 | 0          | 0.0076185  | 0.352      | 4143       | tags=32%, list=16%, signal=39% |
| NO2L12PATHWAY                                              | 16   | -0.7438682 | -1.8046514 | 0.00210526 | 0.00878668 | 0.41       | 3180       | tags=63%, list=13%, signal=71% |
| TOB1PATHWAY                                                | 16   | -0.7489029 | -1.783597  | 0          | 0.01161555 | 0.529      | 1357       | tags=38%, list=5%, signal=40%  |
| STATIN_PATHWAY_PHARMGB                                     | 18   | -0.7093565 | -1.7671908 | 0.00646552 | 0.01355003 | 0.591      | 948        | tags=39%, list=4%, signal=40%  |
| DIAB_NEPH_UP                                               | 60   | -0.5342867 | -1.7426834 | 0          | 0.0179455  | 0.688      | 2951       | tags=42%, list=12%, signal=47% |
| HSIAO0510_N_GLYCAN_BIOSYNTHESIS                            | 41   | -0.5780637 | -1.7379285 | 0          | 0.01823682 | 0.709      | 4507       | tags=41%, list=18%, signal=50% |
| HSIAO0531_GLYCOSAMINOGLYCAN_DEGRADATION                    | 73   | -0.7111252 | -1.7296643 | 0.00840336 | 0.01161555 | 0.743      | 1555       | tags=41%, list=19%, signal=44% |
| WIELAND_HEPATITIS_B_INDUCED                                | 93   | -0.4925956 | -1.7223066 | 0          | 0.02020508 | 0.773      | 2999       | tags=32%, list=12%, signal=36% |
| HSIAO4614_RENIN_ANGIOTENSIN_SYSTEM                         | 17   | -0.6987255 | -1.7122463 | 0.01279318 | 0.02184191 | 0.817      | 2371       | tags=49%, list=9%, signal=52%  |
| GLUTATHIONE_METABOLISM                                     | 31   | -0.5991247 | -1.7013884 | 0.00865801 | 0.02423617 | 0.857      | 1409       | tags=29%, list=6%, signal=31%  |
| HSIAO0150_ANDROGEN_AND_ESTROGEN_METABOLISM                 | 54   | -0.5405413 | -1.6963619 | 0          | 0.00510864 | 0.862      | 678        | tags=17%, list=18%, signal=49% |
| YU_CMVC_DN                                                 | 44   | -0.5490752 | -1.6978747 | 0          | 0.02354499 | 0.869      | 2622       | tags=34%, list=10%, signal=38% |
| DCPATHWAY                                                  | 21   | -0.6544923 | -1.6918993 | 0.00636943 | 0.02467615 | 0.891      | 3312       | tags=33%, list=13%, signal=38% |
| HSIAO4514_CELL_ADHESION_MOLECULES                          | 133  | -0.4683469 | -1.6892378 | 0          | 0.02471314 | 0.897      | 2898       | tags=33%, list=12%, signal=37% |
| CTLAPATHWAY                                                | 17   | -0.6907446 | -1.6829663 | 0.01072961 | 0.01908767 | 0.911      | 1357       | tags=47%, list=18%, signal=51% |
| ROSS_MLL_FUSION                                            | 73   | -0.4985957 | -1.6731197 | 0          | 0.02752006 | 0.938      | 1526       | tags=25%, list=6%, signal=26%  |
| RESISTANCE_XENOGRAFTS_UP                                   | 28   | -0.5934926 | -1.6620537 | 0.00430108 | 0.03206863 | 0.952      | 1027       | tags=25%, list=4%, signal=26%  |
| BENNETT_SLE_UP                                             | 28   | -0.5967727 | -1.6608531 | 0.0045977  | 0.02970834 | 0.953      | 1160       | tags=36%, list=5%, signal=39%  |
| TSA_CDA_DN                                                 | 18   | -0.657881  | -1.6512276 | 0          | 0.03191976 | 0.971      | 2503       | tags=44%, list=10%, signal=49% |
| GLYCOPHINGOLIPID_METABOLISM                                | 22   | -0.6090559 | -1.635017  | 0.01162791 | 0.03759005 | 0.985      | 3248       | tags=55%, list=13%, signal=63% |
| HSIAO0590_ARACHIDONIC_ACID_METABOLISM                      | 54   | -0.511451  | -1.613154  | 0.00205761 | 0.04457585 | 0.994      | 3428       | tags=31%, list=14%, signal=36% |
| HSIAO0592_ALPHA_LINOLENIC_ACID_METABOLISM                  | 16   | -0.6767966 | -1.6128293 | 0.01622718 | 0.04633716 | 0.995      | 1442       | tags=20%, list=6%, signal=21%  |
| HSIAO4610_COMPLEMENT_AND_COAGULATION_CASCADES              | 68   | -0.4852642 | -1.6118037 | 0          | 0.01142    | 0.995      | 4547       | tags=25%, list=14%, signal=44% |
| HSIAO0361_GAMMA_HEXACHLOROCYCLOHEXANE_DEGRADATION          | 23   | -0.6174572 | -1.6084394 | 0.0170914  | 0.04426694 | 0.996      | 3547       | tags=39%, list=14%, signal=46% |
| FLECHNER_KIDNEY_TRANSPLANT_REJECTION_UP                    | 81   | -0.4747207 | -1.6025659 | 0.00221729 | 0.0449154  | 0.996      | 2533       | tags=33%, list=10%, signal=37% |
| BREAST_TUMOR_FUNCTION                                      | 52   | -0.4956814 | -1.5886534 | 0.00683371 | 0.04989203 | 0.997      | 3716       | tags=42%, list=15%, signal=50% |
| UVC_HIGH_ALL_DN                                            | 281  | 0.7311077  | 2.7616491  | 0          | 0          | 0          | 3473       | tags=54%, list=14%, signal=62% |
| RAS_ONCOGENIC_SIGNATURE                                    | 247  | 0.7131348  | 2.716384   | 0          | 0          | 0          | 3049       | tags=48%, list=12%, signal=54% |
| UVC_XPCS_ALL_DN                                            | 448  | 0.6717067  | 2.6503847  | 0          | 0          | 0          | 4567       | tags=54%, list=18%, signal=64% |
| UVC_XPCS_8HR_DN                                            | 382  | 0.6777778  | 2.6371446  | 0          | 0          | 0          | 4550       | tags=55%, list=18%, signal=66% |
| UVC_NHEK3_ALL                                              | 382  | 0.66976905 | 2.6117747  | 0          | 0          | 0          | 4171       | tags=55%, list=17%, signal=65% |
| UVC_TTD_ALL_DN                                             | 337  | 0.67199916 | 2.605418   | 0          | 0          | 0          | 4567       | tags=53%, list=18%, signal=64% |
| ET743_SARCOMA_72HRS_DN                                     | 305  | 0.7012043  | 2.586437   | 0          | 0          | 0          | 4764       | tags=59%, list=19%, signal=72% |
| UVC_XPCS_4HR_DN                                            | 223  | 0.6950709  | 2.5749629  | 0          | 0          | 0          | 4764       | tags=58%, list=19%, signal=71% |
| UVC_NHEK1_DN                                               | 252  | 0.6801975  | 2.5491471  | 0          | 0          | 0          | 4522       | tags=48%, list=18%, signal=58% |
| UVC_TTD_4HR_DN                                             | 277  | 0.6632995  | 2.5246081  | 0          | 0.02389991 | 0          | 4567       | tags=53%, list=18%, signal=64% |
| ET743_SARCOMA_DN                                           | 247  | 0.6700792  | 2.493253   | 0          | 0          | 0          | 4764       | tags=57%, list=19%, signal=69% |
| CHEN_HOXAS_TARGETS_UP                                      | 198  | 0.6797255  | 2.4865031  | 0          | 0          | 0          | 4553       | tags=57%, list=18%, signal=69% |
| UVC_NHEK3_C1                                               | 56   | 0.7993145  | 2.4646053  | 0          | 0          | 0          | 2882       | tags=64%, list=11%, signal=72% |
| ET743_SARCOMA_48HRS_DN                                     | 171  | 0.6765626  | 2.4612324  | 0          | 0          | 0          | 4764       | tags=57%, list=18%, signal=69% |
| UVC_TTD_8HR_DN                                             | 157  | 0.684579   | 2.4589424  | 0          | 0          | 0          | 4228       | tags=54%, list=17%, signal=64% |
| UVC_TTD-XPCS_COMMON_DN                                     | 136  | 0.6956368  | 2.4438024  | 0          | 0          | 0          | 4713       | tags=59%, list=19%, signal=72% |
| REOVIRUS_HEK293_UP                                         | 321  | 0.6547243  | 2.4264152  | 0          | 0          | 0          | 4279       | tags=52%, list=17%, signal=62% |
| HYPOXIA_REVIEW                                             | 80   | 0.74071383 | 2.4245412  | 0          | 0          | 0          | 2849       | tags=54%, list=18%, signal=65% |
| LEI_MYB_REGULATED_GENES                                    | 305  | 0.63072145 | 2.4140236  | 0          | 0          | 0          | 4270       | tags=41%, list=11%, signal=46% |
| BAF57_BT549_DN                                             | 308  | 0.6272466  | 2.3931077  | 0          | 0          | 0          | 4317       | tags=47%, list=17%, signal=56% |
| UVC_NHEK3_C0                                               | 80   | 0.7314832  | 2.389196   | 0          | 0          | 0          | 3202       | tags=55%, list=13%, signal=63% |
| HDAC1_COLON_SUL_UP                                         | 122  | 0.68948275 | 2.385207   | 0          | 0          | 0          | 3488       | tags=55%, list=18%, signal=69% |
| SMITH_HTERT_UP                                             | 101  | 0.7100272  | 2.37374    | 0          | 0          | 0          | 5076       | tags=70%, list=20%, signal=88% |
| UVC_NHEK3_C0                                               | 79   | 0.73286426 | 2.3713799  | 0          | 0          | 0          | 4265       | tags=61%, list=17%, signal=73% |
| MENSE_HYPOXIA_UP                                           | 98   | 0.7055276  | 2.371113   | 0          | 0          | 0          | 1845       | tags=43%, list=7%, signal=46%  |
| UVC_SCC_DN                                                 | 99   | 0.70579594 | 2.366092   | 0          | 0          | 0          | 3392       | tags=53%, list=17%, signal=65% |
| STENKELL_COMMON_UP                                         | 169  | 0.6554166  | 2.357283   | 0          | 0          | 0          | 4413       | tags=57%, list=18%, signal=69% |
| DIAB_NEPH_DN                                               | 357  | 0.6136923  | 2.3564508  | 0          | 0          | 0          | 5089       | tags=54%, list=20%, signal=67% |
| UVC_NHEK1_C6                                               | 121  | 0.67588675 | 2.329886   | 0          | 0          | 0          | 4522       | tags=46%, list=18%, signal=56% |
| MRNA_PROCESSING_REACTOME                                   | 108  | 0.683486   | 2.3248386  | 0          | 0          | 0          | 5626       | tags=69%, list=22%, signal=89% |
| ADIP_DIFF_CLUSTER2                                         | 29   | 0.8046276  | 2.3217697  | 0          | 0          | 0          | 2251       | tags=69%, list=8%, signal=76%  |
| HYPOXIA_REG_UP                                             | 36   | 0.8241779  | 2.318427   | 0          | 0          | 0          | 3010       | tags=75%, list=12%, signal=85% |
| ZUCCHI_EPITHELIAL_DN                                       | 42   | 0.79983157 | 2.3175628  | 0          | 0          | 0          | 2954       | tags=71%, list=12%, signal=81% |
| ROME_INSULIN_2E_UP                                         | 183  | 0.6753047  | 2.3169801  | 0          | 0          | 0          | 4716       | tags=56%, list=19%, signal=68% |
| ET743_SARCOMA_24HRS_DN                                     | 102  | 0.6726107  | 2.3071294  | 0          | 0          | 0          | 5166       | tags=58%, list=18%, signal=72% |
| HCC_SURVIVAL_GOOD_VS_POOR_DN                               | 133  | 0.66835696 | 2.306035   | 0          | 0          | 0          | 4558       | tags=57%, list=18%, signal=69% |
| HDAC1_COLON_SUL48HRS_UP                                    | 83   | 0.69606674 | 2.3040853  | 0          | 0          | 0          | 3484       | tags=58%, list=14%, signal=67% |
| HDAC1_COLON_SUL24HRS_UP                                    | 60   | 0.7386663  | 2.302893   | 0          | 0          | 0          | 3155       | tags=53%, list=13%, signal=61% |
| CMV_HCMV_TIMECOURSE_14HRS_UP                               | 43   | 0.7778497  | 2.3006806  | 0          | 0          | 0          | 2581       | tags=53%, list=10%, signal=60% |
| UVC_NHEK2_DN                                               | 80   | 0.70636415 | 2.2931325  | 0          | 0          | 0          | 3755       | tags=59%, list=15%, signal=69% |
| CROONQUIST_IL6_STROMA_UP                                   | 38   | 0.7948322  | 2.290348   | 0          | 0          | 0          | 1781       | tags=45%, list=7%, signal=48%  |
| GALINDO_ACT_UP                                             | 76   | 0.7045212  | 2.2755783  | 0          | 0          | 0          | 4010       | tags=63%, list=16%, signal=75% |
| UVC_HIGH_D3_DN                                             | 44   | 0.7707451  | 2.2747502  | 0          | 0          | 0          | 3040       | tags=57%, list=12%, signal=65% |
| CTNNB1_ONCOGENIC_SIGNATURE                                 | 76   | 0.7083442  | 2.2654316  | 0          | 0          | 0          | 4378       | tags=54%, list=17%, signal     |

|                                             |     |            |           |   |          |       |      |                                 |
|---------------------------------------------|-----|------------|-----------|---|----------|-------|------|---------------------------------|
| PASSERINI_GROWTH                            | 32  | 0.7768467  | 2.1254287 | 0 | 0        | 0     | 2194 | tags=47%, list=9%, signal=51%   |
| FLECHNER_KIDNEY_TRANSPLANT_WELL_UP          | 499 | 0.53676116 | 2.1221223 | 0 | 0        | 0     | 4754 | tags=52%, list=19%, signal=63%  |
| BHATTACHARYA_ESC_UP                         | 67  | 0.6698899  | 2.1208148 | 0 | 0        | 0     | 3709 | tags=46%, list=9%, signal=54%   |
| UVB_NHEK1_C2                                | 22  | 0.82801056 | 2.1183314 | 0 | 0        | 0     | 1835 | tags=59%, list=7%, signal=64%   |
| BRCA1_OVEREXP_DN                            | 104 | 0.628125   | 2.118226  | 0 | 0        | 0     | 5005 | tags=60%, list=20%, signal=74%  |
| LVAD_HEARTFAILURE_UP                        | 83  | 0.6528801  | 2.1174629 | 0 | 0        | 0     | 2616 | tags=45%, list=10%, signal=50%  |
| VERNELL_PRB_CLSTR2                          | 18  | 0.8802312  | 2.1162043 | 0 | 0        | 0     | 2131 | tags=72%, list=16%, signal=79%  |
| ENT_DN                                      | 54  | 0.6821163  | 2.1149676 | 0 | 0        | 0     | 2036 | tags=41%, list=8%, signal=44%   |
| FSH_GRANULOSA_DN                            | 75  | 0.651781   | 2.1141446 | 0 | 0        | 0     | 3717 | tags=43%, list=15%, signal=50%  |
| UVB_NHEK1_UP                                | 170 | 0.5861571  | 2.113819  | 0 | 0        | 0     | 4167 | tags=43%, list=17%, signal=51%  |
| BLEO_MOUSE_LYMPH_HIGH_24HRS_DN              | 34  | 0.7578431  | 2.1113348 | 0 | 0        | 0     | 3450 | tags=65%, list=14%, signal=75%  |
| BRCA1_MES_UP                                | 40  | 0.72991526 | 2.1079836 | 0 | 0        | 0     | 3691 | tags=60%, list=18%, signal=70%  |
| FSH_OVARY_MCV152_DN                         | 44  | 0.71253186 | 2.1053412 | 0 | 0        | 0     | 5014 | tags=66%, list=20%, signal=82%  |
| INOS_ALL_UP                                 | 53  | 0.69055915 | 2.1046143 | 0 | 0        | 0     | 3452 | tags=58%, list=14%, signal=68%  |
| UVC_HIGH_D4_DN                              | 45  | 0.7182838  | 2.1024406 | 0 | 0        | 0     | 3473 | tags=49%, list=14%, signal=57%  |
| INSULIN_ADIP_INSENS_UP                      | 21  | 0.84055626 | 2.1008787 | 0 | 0        | 0     | 2241 | tags=71%, list=9%, signal=78%   |
| MYC_TARGETS                                 | 41  | 0.73352754 | 2.100487  | 0 | 0        | 0     | 5005 | tags=71%, list=20%, signal=88%  |
| LEE_TCELLS9_UP                              | 27  | 0.7720896  | 2.0992036 | 0 | 0        | 0     | 3668 | tags=52%, list=15%, signal=61%  |
| DMT1_KO_UP                                  | 73  | 0.6541672  | 2.0989451 | 0 | 0        | 0     | 5022 | tags=56%, list=20%, signal=70%  |
| IGF1_NIH3T3_UP                              | 36  | 0.7421936  | 2.0934386 | 0 | 0        | 0     | 2273 | tags=44%, list=9%, signal=49%   |
| CMV_UV-CMV_COMMON_HCMV_6HRS_DN              | 27  | 0.78365064 | 2.0900497 | 0 | 0        | 0     | 3827 | tags=67%, list=15%, signal=79%  |
| BRCA1_OVEREXP_PROSTATE_UP                   | 157 | 0.58371794 | 2.0888524 | 0 | 0        | 0     | 3014 | tags=38%, list=12%, signal=43%  |
| ESR_FIBROBLAST_UP                           | 50  | 0.686892   | 2.0886297 | 0 | 0        | 0     | 3431 | tags=50%, list=14%, signal=58%  |
| AS3_FIBRO_DN                                | 31  | 0.762978   | 2.0877326 | 0 | 0        | 0     | 1623 | tags=45%, list=6%, signal=48%   |
| UVC_HIGH_D6_DN                              | 29  | 0.77306867 | 2.0845647 | 0 | 0        | 0     | 2682 | tags=55%, list=11%, signal=62%  |
| ADIP_VS_FIBRO_DN                            | 26  | 0.775795   | 2.082162  | 0 | 0        | 0     | 4088 | tags=65%, list=16%, signal=78%  |
| LH_GRANULOSA_DN                             | 75  | 0.651781   | 2.0811195 | 0 | 0        | 0     | 3717 | tags=43%, list=15%, signal=50%  |
| VHL_NORMAL_UP                               | 403 | 0.52937466 | 2.0772256 | 0 | 0        | 0     | 4662 | tags=45%, list=15%, signal=62%  |
| HDAC1_COLON_SUL16HRS_UP                     | 40  | 0.72637904 | 2.0764806 | 0 | 0        | 0     | 3239 | tags=52%, list=17%, signal=60%  |
| HUMAN_CD34_ENRICHED_TRANSCRIPTION_FACTORS   | 181 | 0.56800765 | 2.0751934 | 0 | 0        | 0     | 4692 | tags=46%, list=19%, signal=57%  |
| CANCER_NEOPLASTIC_META_UP                   | 61  | 0.67552286 | 2.0739715 | 0 | 0        | 0     | 5162 | tags=66%, list=21%, signal=82%  |
| CMV_HCMV_TIMECOURSE_20HRS_DN                | 34  | 0.73703194 | 2.0734875 | 0 | 0        | 0     | 3940 | tags=53%, list=11%, signal=64%  |
| IDX_TSA_DN_CLUSTER3                         | 80  | 0.63549864 | 2.0725622 | 0 | 0        | 0     | 2700 | tags=43%, list=11%, signal=47%  |
| RIBAVIRIN_RSV_DN                            | 42  | 0.70265734 | 2.068854  | 0 | 0        | 0     | 2146 | tags=40%, list=9%, signal=44%   |
| AD12_24HRS_DN                               | 19  | 0.82372886 | 2.065237  | 0 | 0        | 0     | 3919 | tags=58%, list=6%, signal=62%   |
| MRNA_SPLICING                               | 50  | 0.6785124  | 2.0642505 | 0 | 1.25E-05 | 0.001 | 5118 | tags=43%, list=19%, signal=54%  |
| GERY_CEBP_TARGETS                           | 111 | 0.6055935  | 2.0624785 | 0 | 0        | 0     | 4602 | tags=45%, list=18%, signal=61%  |
| AGEING_KIDNEY_SPECIFIC_UP                   | 173 | 0.5752395  | 2.0601087 | 0 | 0        | 0     | 3117 | tags=39%, list=12%, signal=45%  |
| CIS_XPC_DN                                  | 180 | 0.5702676  | 2.0579672 | 0 | 0        | 0     | 5478 | tags=48%, list=22%, signal=61%  |
| HDAC1_COLON_SUL12HRS_UP                     | 23  | 0.80439687 | 2.0556948 | 0 | 0        | 0     | 2817 | tags=61%, list=12%, signal=68%  |
| TGFBETA_ALL_UP                              | 79  | 0.6358222  | 2.0528662 | 0 | 0        | 0     | 2888 | tags=46%, list=11%, signal=51%  |
| UVC_HIGH_D5_DN                              | 33  | 0.7468514  | 2.0497942 | 0 | 0        | 0     | 5438 | tags=73%, list=22%, signal=93%  |
| SCHUMACHER_MYC_UP                           | 51  | 0.67054915 | 2.049625  | 0 | 0        | 0     | 3919 | tags=57%, list=16%, signal=67%  |
| P53_SIGNALING                               | 83  | 0.6154286  | 2.0471282 | 0 | 1.25E-05 | 0.001 | 5118 | tags=43%, list=19%, signal=54%  |
| CMV-UV_HCMV_6HRS_DN                         | 103 | 0.600117   | 2.037961  | 0 | 1.24E-05 | 0.001 | 4602 | tags=45%, list=18%, signal=61%  |
| HSOA4520_ADHERENS_JUNCTION                  | 75  | 0.6280697  | 2.0362694 | 0 | 1.23E-05 | 0.001 | 3133 | tags=39%, list=12%, signal=44%  |
| UVB_NHEK1_C5                                | 33  | 0.7150144  | 2.0353777 | 0 | 1.22E-05 | 0.001 | 4323 | tags=52%, list=17%, signal=62%  |
| SHEPARD_CRASH_AND_BURN_MUT_VS_WT_UP         | 157 | 0.5786524  | 2.0318677 | 0 | 1.58E-05 | 0.003 | 4228 | tags=43%, list=17%, signal=51%  |
| HDAC1_COLON_CURL2HRS_UP                     | 20  | 0.8091005  | 2.0309381 | 0 | 1.56E-05 | 0.003 | 2817 | tags=60%, list=17%, signal=68%  |
| LINDSTEDT_DEND_8H_VS_48H_DN                 | 64  | 0.63993996 | 2.0296137 | 0 | 1.53E-05 | 0.003 | 3141 | tags=41%, list=12%, signal=46%  |
| TARTE_PLASMA_BLAISTIC                       | 287 | 0.5311172  | 2.0293057 | 0 | 1.50E-05 | 0.003 | 4300 | tags=44%, list=17%, signal=53%  |
| LI_FETAL_VS_WT_KIDNEY_DN                    | 152 | 0.57273483 | 2.0283394 | 0 | 1.46E-05 | 0.004 | 5282 | tags=43%, list=21%, signal=54%  |
| TGFBETA_EARLY_UP                            | 46  | 0.68734441 | 2.0280695 | 0 | 1.41E-05 | 0.004 | 2888 | tags=50%, list=17%, signal=61%  |
| CHANG_SERUM_RESPONSE_UP                     | 141 | 0.5747282  | 2.026016  | 0 | 1.47E-05 | 0.004 | 4628 | tags=48%, list=18%, signal=59%  |
| HSOA4115_P53_SIGNALING_PATHWAY              | 68  | 0.6404768  | 2.0193105 | 0 | 1.79E-05 | 0.007 | 2729 | tags=31%, list=11%, signal=35%  |
| PASSERINI_APOPTOSIS                         | 42  | 0.6877942  | 2.0173488 | 0 | 1.78E-05 | 0.007 | 4151 | tags=62%, list=17%, signal=74%  |
| ELONGINA_KO_DN                              | 174 | 0.5557595  | 2.0172801 | 0 | 1.83E-05 | 0.007 | 4141 | tags=42%, list=17%, signal=56%  |
| IGFR_IR_UP                                  | 18  | 0.8152073  | 2.0133336 | 0 | 1.77E-05 | 0.007 | 1466 | tags=50%, list=6%, signal=53%   |
| HYPOXIA_NORMAL_UP                           | 200 | 0.5489671  | 2.009447  | 0 | 1.80E-05 | 0.008 | 4930 | tags=50%, list=20%, signal=61%  |
| GREENBAUM_E2A_UP                            | 33  | 0.7166355  | 2.005369  | 0 | 1.92E-05 | 0.009 | 4679 | tags=42%, list=19%, signal=52%  |
| IL1RPATHWAY                                 | 32  | 0.7158328  | 2.001622  | 0 | 1.08E-04 | 0.01  | 3784 | tags=53%, list=17%, signal=63%  |
| RUIZ_TENASCIN_TARGETS                       | 77  | 0.76206814 | 1.9996426 | 0 | 1.18E-04 | 0.011 | 2886 | tags=35%, list=11%, signal=39%  |
| HSOA5222_SMALL_CELL_LUNG_CANCER             | 87  | 0.60124296 | 1.9992994 | 0 | 1.17E-04 | 0.011 | 4151 | tags=45%, list=17%, signal=54%  |
| DORSEY_DOXYCYCLINE_UP                       | 29  | 0.7327021  | 1.9981546 | 0 | 1.17E-04 | 0.011 | 3043 | tags=45%, list=12%, signal=51%  |
| HALMOS_CEBP_DN                              | 43  | 0.6817201  | 1.9975718 | 0 | 1.13E-04 | 0.011 | 1326 | tags=35%, list=5%, signal=37%   |
| GN_CAMP_GRANULOSA_DN                        | 59  | 0.6446625  | 1.9970189 | 0 | 1.15E-04 | 0.011 | 4206 | tags=44%, list=17%, signal=53%  |
| BRCA1_OVEREXP_PROSTATE_DN                   | 76  | 0.61893857 | 1.9967678 | 0 | 1.14E-04 | 0.011 | 5076 | tags=51%, list=20%, signal=64%  |
| UVC_HIGH_D9_DN                              | 22  | 0.78159994 | 1.9943372 | 0 | 1.45E-04 | 0.014 | 3045 | tags=55%, list=12%, signal=62%  |
| HDAC1_COLON_TSA_DN                          | 60  | 0.6458734  | 1.993618  | 0 | 1.44E-04 | 0.014 | 3347 | tags=45%, list=20%, signal=56%  |
| UVB_SCC_UP                                  | 85  | 0.60566986 | 1.9933167 | 0 | 1.43E-04 | 0.014 | 4862 | tags=49%, list=19%, signal=61%  |
| HDAC1_COLON_CUR2HRS_UP                      | 26  | 0.752353   | 1.991717  | 0 | 1.42E-04 | 0.014 | 4765 | tags=65%, list=19%, signal=81%  |
| HSOA5220_CHRONIC_MYELOID_LEUKEMIA           | 76  | 0.62831086 | 1.9868186 | 0 | 1.61E-04 | 0.016 | 4522 | tags=45%, list=18%, signal=54%  |
| IL6PATHWAY                                  | 21  | 0.7786122  | 1.9848444 | 0 | 1.70E-04 | 0.017 | 5118 | tags=40%, list=20%, signal=108% |
| MOREAUX_TACT_HI_VS_LOW_DN                   | 155 | 0.58487496 | 1.9847448 | 0 | 1.73E-04 | 0.017 | 4258 | tags=39%, list=17%, signal=50%  |
| UVB_NHEK1_C1                                | 49  | 0.6621438  | 1.9835559 | 0 | 1.78E-04 | 0.018 | 4133 | tags=43%, list=16%, signal=51%  |
| UVC_HIGH_D7_DN                              | 31  | 0.7139043  | 1.9806664 | 0 | 1.96E-04 | 0.02  | 3384 | tags=58%, list=19%, signal=67%  |
| HSOA5211_RENAL_CELL_CARCINOMA               | 69  | 0.6171755  | 1.9747648 | 0 | 2.15E-04 | 0.022 | 4628 | tags=49%, list=18%, signal=60%  |
| ZUCCHI_EPITHELIAL_UP                        | 42  | 0.6727714  | 1.9716022 | 0 | 2.13E-04 | 0.022 | 3324 | tags=57%, list=17%, signal=68%  |
| EGF_HDMC_UP                                 | 43  | 0.67631227 | 1.9712064 | 0 | 2.12E-04 | 0.022 | 3647 | tags=60%, list=14%, signal=71%  |
| HSOA5215_PROSTATE_CANCER                    | 87  | 0.59314257 | 1.9682002 | 0 | 2.30E-04 | 0.024 | 4151 | tags=37%, list=17%, signal=44%  |
| CORDERO_KRAS_KO_VS_CONTROL_UP               | 75  | 0.61574644 | 1.9643278 | 0 | 2.47E-04 | 0.026 | 2586 | tags=37%, list=10%, signal=41%  |
| MMS_MOUSE_LYMPH_HIGH_4HRS_UP                | 35  | 0.6849351  | 1.959171  | 0 | 2.84E-04 | 0.029 | 3653 | tags=51%, list=10%, signal=59%  |
| UVC_LOW_ALL_DN                              | 56  | 0.6391825  | 1.9574432 | 0 | 2.92E-04 | 0.03  | 3308 | tags=41%, list=13%, signal=47%  |
| FERRARI_4HPR_UP                             | 24  | 0.75102735 | 1.9512345 | 0 | 3.18E-04 | 0.033 | 2807 | tags=63%, list=11%, signal=70%  |
| PARP_KO_UP                                  | 30  | 0.70516104 | 1.9505106 | 0 | 3.44E-04 | 0.036 | 1739 | tags=47%, list=7%, signal=50%   |
| HSOA5210_COLORECTAL_CANCER                  | 84  | 0.59421563 | 1.946213  | 0 | 3.58E-04 | 0.038 | 4590 | tags=40%, list=19%, signal=52%  |
| ALZHEIMERS_INCIPENT_DN                      | 139 | 0.5512001  | 1.9461124 | 0 | 3.58E-04 | 0.038 | 5369 | tags=50%, list=21%, signal=63%  |
| KERATINOCYTEPATHWAY                         | 44  | 0.6564637  | 1.9435986 | 0 | 3.74E-04 | 0.04  | 5001 | tags=61%, list=20%, signal=75%  |
| CHAUHAN_ZME2                                | 46  | 0.6507756  | 1.9434426 | 0 | 3.72E-04 | 0.04  | 3453 | tags=48%, list=14%, signal=56%  |
| OXYSTRESS_REPTHEREE_DN                      | 27  | 0.71912607 | 1.9414723 | 0 | 3.79E-04 | 0.041 | 3309 | tags=41%, list=14%, signal=50%  |
| HSOA3010_RIBOSOME                           | 86  | 0.58615047 | 1.9408609 | 0 | 3.76E-04 | 0.041 | 5829 | tags=59%, list=23%, signal=77%  |
| HSOA4010_MAPK_SIGNALING_PATHWAY             | 256 | 0.51420504 | 1.9369632 | 0 | 4.45E-04 | 0.049 | 4763 | tags=36%, list=19%, signal=44%  |
| PASSERINI_PROLIFERATION                     | 64  | 0.6140659  | 1.9357102 | 0 | 4.43E-04 | 0.049 | 3509 | tags=42%, list=14%, signal=49%  |
| BREASTCA_TWO_CLASSES                        | 133 | 0.54954684 | 1.9356118 | 0 | 4.40E-04 | 0.049 | 4291 | tags=46%, list=17%, signal=56%  |
| CIRCADIAN_EXERCISE                          | 42  | 0.66840845 | 1.9353153 | 0 | 4.38E-04 | 0.049 | 3091 | tags=55%, list=12%, signal=62%  |
| TPA_RESIST_MIDDLE_UP                        | 45  | 0.65197    | 1.9339422 | 0 | 4.53E-04 | 0.051 | 3014 | tags=44%, list=12%, signal=50%  |
| TNFA_NFKB_DEP_UP                            | 18  | 0.7888152  | 1.933441  | 0 | 4.59E-04 | 0.052 | 3070 | tags=72%, list=12%, signal=82%  |
| BASSO_REGULATORY_HUBS                       | 131 | 0.55684376 | 1.9291278 | 0 | 5.08E-04 | 0.056 | 1743 | tags=53%, list=10%, signal=65%  |
| AD12_32HRS_DN                               | 15  | 0.8193685  | 1.9290789 | 0 | 5.05E-04 | 0.058 | 1495 | tags=60%, list=6%, signal=64%   |
| IRITANI_ADPROX_VASC                         | 149 | 0.54856527 | 1.9274249 | 0 | 5.02E-04 | 0.058 | 2614 | tags=35%, list=10%, signal=39%  |
| GH_GHRRH_KO_24HRS_DN                        | 160 | 0.5415715  | 1.9261227 | 0 | 5.16E-04 | 0.059 | 3914 | tags=41%, list=16%, signal=48%  |
| HSOA5218_MELANOMA                           | 71  | 0.6037318  | 1.9260519 | 0 | 5.13E-04 | 0.059 | 3623 | tags=31%, list=14%, signal=36%  |
| WNT_TARGETS                                 | 23  | 0.753381   | 1.9258152 | 0 | 5.11E-04 | 0.059 | 942  | tags=39%, list=13%, signal=47%  |
| FLECHNER_KIDNEY_TRANSPLANT_REJECTION_PBL_UP | 60  | 0.6210923  | 1.9237087 | 0 | 5.16E-04 | 0.06  | 4627 | tags=52%, list=18%, signal=63%  |
| CMV_ALL_DN                                  | 101 | 0.5737767  | 1.9231741 | 0 | 5.22E-04 | 0.061 | 4443 | tags=44%, list=18%, signal=53%  |
| CHEN_LUNG_SURVIVAL                          | 21  | 0.74561137 | 1.9227023 | 0 | 5.19E-04 | 0.061 | 2524 | tags=48%, list=10%, signal=53%  |
| METPATHWAY                                  | 35  | 0.684638   | 1.9225038 | 0 | 5.16E-04 | 0.061 | 4907 | tags=60%, list=17%, signal=69%  |
| SMOOTH_MUSCLE_CONTRACTION                   | 142 | 0.5435957  | 1.9205713 | 0 | 5.21E-04 | 0.062 | 2801 | tags=28%, list=11%, signal=32%  |
| BRCA1KO_MEF_DN                              | 77  | 0.5997974  | 1.9199026 | 0 | 5.42E-04 | 0.065 | 1743 | tags=49%, list=18%, signal=60%  |
| CROONQUIST_RAS_STROMA_DN                    | 21  | 0.76668924 | 1.9191358 | 0 | 5.48E-04 | 0.066 | 4505 | tags=43%, list=7%, signal=46%   |
| HT43PT650_COLOCA_CDN                        | 44  | 0.6536024  | 1.9190735 | 0 | 5.45E-04 | 0.066 | 3308 | tags=43%, list=14%, signal=50%  |
| ACTINYPATHWAY                               | 18  | 0.778035   | 1.9187576 | 0 | 5.42E-04 | 0.066 | 4007 | tags=61%, list=16%, signal=73%  |
| H2O2_CSDBIFF_C2                             | 32  | 0.70029414 | 1.9164798 | 0 | 5.47E-04 | 0.067 | 4907 | tags=53%, list=20%, signal=66%  |
| STRESS_TPA_SPECIFIC_UP                      | 43  | 0.6538917  | 1.915435  | 0 | 5.52E-04 | 0.068 | 3080 | tags=49%, list=12%, signal=56%  |
| HTERT_DN                                    | 65  | 0.6067549  | 1.9144875 | 0 | 5.57E-04 | 0.069 | 3252 | tags=34%, list=13%, signal=39%  |
| MAPKPATHWAY                                 | 85  | 0.5875574  | 1.9136709 | 0 | 5.54E-04 | 0.069 | 5014 | tags=54%, list=20%, signal=67%  |

|                                                                     |     |            |           |            |            |       |                                     |
|---------------------------------------------------------------------|-----|------------|-----------|------------|------------|-------|-------------------------------------|
| PASSERINI_TRANSCRIPTION                                             | 72  | 0.59117603 | 1.8761597 | 0          | 8.99E-04   | 0.128 | 3623 tags=39%, list=14%, signal=45% |
| IFN_BETA_UP                                                         | 65  | 0.59661084 | 1.8755304 | 0          | 9.08E-04   | 0.129 | 3369 tags=42%, list=13%, signal=48% |
| HS045216_THYROID_CANCER                                             | 29  | 0.69605863 | 1.8745660 | 0          | 9.10E-04   | 0.13  | 3468 tags=48%, list=10%, signal=56% |
| P53GENES_ALL                                                        | 17  | 0.7739477  | 1.8731967 | 0          | 9.26E-04   | 0.133 | 1739 tags=41%, list=7%, signal=44%  |
| INTEGRINPATHWAY                                                     | 35  | 0.65929353 | 1.8723502 | 0          | 9.80E-04   | 0.139 | 5054 tags=60%, list=20%, signal=75% |
| HS0404350_TGF_BETA_SIGNALING_PATHWAY                                | 88  | 0.5656635  | 1.8717066 | 0          | 9.82E-04   | 0.14  | 3187 tags=32%, list=13%, signal=36% |
| HS040970_AMINOACYL_TRNA_BIOSYNTHESIS                                | 37  | 0.6339692  | 1.8711178 | 0          | 9.78E-04   | 0.141 | 4374 tags=59%, list=17%, signal=72% |
| INSULIN_SIGNALING                                                   | 97  | 0.5531994  | 1.8709396 | 0          | 9.80E-04   | 0.141 | 4200 tags=42%, list=17%, signal=51% |
| POD1_KO_MOST_UP                                                     | 29  | 0.68167794 | 1.8708454 | 0          | 9.76E-04   | 0.141 | 3689 tags=41%, list=15%, signal=48% |
| SFU_RESIST_GASTRIC_UP                                               | 20  | 0.7427864  | 1.8701516 | 0.00186916 | 0.00100336 | 0.145 | 1785 tags=45%, list=7%, signal=48%  |
| CMV_HCMV_TIMECOURSE_18HRS_UP                                        | 72  | 0.5886122  | 1.8687562 | 0          | 0.00102459 | 0.148 | 4746 tags=53%, list=19%, signal=65% |
| IDX_TSA_DN_CLUSTERS                                                 | 48  | 0.6352365  | 1.8675965 | 0          | 0.00103755 | 0.154 | 4754 tags=57%, list=19%, signal=70% |
| OKUMURA_MC_LPS                                                      | 174 | 0.5111778  | 1.866848  | 0          | 0.00106565 | 0.156 | 4866 tags=40%, list=19%, signal=50% |
| LIZUKA_G1_S1M_G2                                                    | 25  | 0.7059018  | 1.8630265 | 0          | 0.00109204 | 0.159 | 3614 tags=52%, list=14%, signal=61% |
| HDAC1_COLON_CUR_DN                                                  | 48  | 0.621775   | 1.8623995 | 0          | 0.00110599 | 0.162 | 5885 tags=60%, list=23%, signal=79% |
| PDGFPATHWAY                                                         | 27  | 0.7071788  | 1.8622587 | 0          | 0.00111387 | 0.164 | 5118 tags=59%, list=20%, signal=74% |
| TNFALPHA_4HRS_UP                                                    | 38  | 0.64306563 | 1.8616799 | 0          | 0.00112184 | 0.165 | 4475 tags=61%, list=18%, signal=74% |
| NOUZOVA_CPG_H4_UP                                                   | 109 | 0.5459977  | 1.8582488 | 0          | 0.00118445 | 0.174 | 5399 tags=51%, list=21%, signal=65% |
| TRANSLATION_FACTORS                                                 | 39  | 0.6521746  | 1.8581234 | 0          | 0.00117972 | 0.174 | 6049 tags=69%, list=24%, signal=91% |
| CORDERO_ARAS_KO_VS_CONTROL_DN                                       | 54  | 0.59982175 | 1.8549875 | 0.00176991 | 0.00128491 | 0.188 | 2466 tags=28%, list=10%, signal=31% |
| RACCYCDPATHWAY                                                      | 22  | 0.74098134 | 1.8524692 | 0          | 0.00132799 | 0.193 | 3453 tags=55%, list=14%, signal=63% |
| SFU_RESIST_GASTRIC_DN                                               | 16  | 0.78119534 | 1.8508569 | 0.00194175 | 0.00136501 | 0.199 | 2223 tags=50%, list=9%, signal=55%  |
| TNFALPHA_ALL_UP                                                     | 74  | 0.57598275 | 1.8493191 | 0          | 0.00140112 | 0.204 | 3272 tags=43%, list=13%, signal=50% |
| ST_P38_MAPK_PATHWAY                                                 | 37  | 0.6422736  | 1.8479224 | 0          | 0.00142526 | 0.207 | 4907 tags=57%, list=20%, signal=70% |
| ST_TUMOR_NECROSIS_FACTOR_PATHWAY                                    | 29  | 0.684963   | 1.8469577 | 0          | 0.00142537 | 0.208 | 3133 tags=52%, list=12%, signal=59% |
| IL1_TO_S_CELL_CYCLE_REACTOME                                        | 67  | 0.5799131  | 1.8454963 | 0          | 0.00143754 | 0.211 | 2700 tags=28%, list=11%, signal=32% |
| FLECHNER_KIDNEY_TRANSPLANT_WELL_PBL_DN                              | 40  | 0.6340644  | 1.8437128 | 0          | 0.00148472 | 0.219 | 3395 tags=45%, list=13%, signal=52% |
| ST_JNK_MAPK_PATHWAY                                                 | 40  | 0.63394994 | 1.8434844 | 0          | 0.00148491 | 0.219 | 4737 tags=55%, list=18%, signal=68% |
| TAKEDA_NUP8_HOX49_16D_DN                                            | 205 | 0.50319064 | 1.8428289 | 0          | 0.00149092 | 0.222 | 3016 tags=30%, list=12%, signal=34% |
| SRC_ONCOGENIC_SIGNATURE                                             | 56  | 0.5973204  | 1.8407339 | 0.00344234 | 0.00156081 | 0.231 | 4429 tags=46%, list=18%, signal=56% |
| RAY_P210_DIFF                                                       | 53  | 0.60886353 | 1.8404403 | 0          | 0.00155485 | 0.231 | 4427 tags=49%, list=18%, signal=59% |
| SIG_CD40PATHWAYMAP                                                  | 33  | 0.6314017  | 1.8395193 | 0.00190476 | 0.00195582 | 0.245 | 6255 tags=61%, list=23%, signal=75% |
| RNA_TRANSCRIPTION_REACTOME                                          | 35  | 0.6477278  | 1.8363087 | 0          | 0.00167457 | 0.249 | 5009 tags=60%, list=20%, signal=75% |
| CMV_HCMV_TIMECOURSE_16HRS_UP                                        | 56  | 0.59623724 | 1.8359889 | 0          | 0.00168559 | 0.252 | 4089 tags=45%, list=16%, signal=53% |
| FASPATHWAY                                                          | 27  | 0.69500375 | 1.8356726 | 0.00187617 | 0.0016908  | 0.253 | 3133 tags=52%, list=12%, signal=59% |
| AMINOACYL_TRNA_BIOSYNTHESIS                                         | 32  | 0.7113669  | 1.8352123 | 0.00378602 | 0.00174066 | 0.257 | 4602 tags=70%, list=19%, signal=85% |
| HDAC1_COLON_BUT48HRS_DN                                             | 109 | 0.5328054  | 1.8276474 | 0          | 0.00190413 | 0.283 | 5063 tags=48%, list=20%, signal=60% |
| H2O2_CSBRSCUED_UP                                                   | 53  | 0.5982325  | 1.8273699 | 0          | 0.00190814 | 0.283 | 2181 tags=32%, list=9%, signal=35%  |
| ST_FAS_SIGNALING_PATHWAY                                            | 64  | 0.5874385  | 1.8266273 | 0          | 0.00191795 | 0.285 | 5050 tags=56%, list=20%, signal=70% |
| FETAL_LIVER_ENRICHED_TRANSCRIPTION_FACTORS                          | 72  | 0.56081617 | 1.8251083 | 0          | 0.00195582 | 0.292 | 5794 tags=51%, list=23%, signal=69% |
| HDAC1_COLON_CUR24HRS_DN                                             | 24  | 0.7123019  | 1.8237416 | 0          | 0.00200999 | 0.299 | 4880 tags=54%, list=19%, signal=67% |
| TGFBETA_C1_UP                                                       | 16  | 0.7789454  | 1.8208697 | 0.00184843 | 0.00208065 | 0.31  | 1683 tags=50%, list=7%, signal=54%  |
| ABRAHAM_AL_VS_MM_DN                                                 | 18  | 0.750754   | 1.8195858 | 0          | 0.00212322 | 0.319 | 3030 tags=61%, list=12%, signal=69% |
| RADIATION_SENSITIVITY                                               | 24  | 0.70560775 | 1.8191439 | 0          | 0.00213212 | 0.32  | 2194 tags=33%, list=9%, signal=36%  |
| KIM_TH_CELLS_DN                                                     | 17  | 0.7386057  | 1.818989  | 0          | 0.00212439 | 0.32  | 3525 tags=58%, list=19%, signal=71% |
| GALE_FLT3ANDAPL_UP                                                  | 50  | 0.5988208  | 1.8187535 | 0          | 0.00212773 | 0.321 | 4852 tags=60%, list=19%, signal=74% |
| IL1_CORNEA_UP                                                       | 62  | 0.5906504  | 1.8169756 | 0          | 0.00216937 | 0.323 | 1965 tags=31%, list=8%, signal=33%  |
| UVC_LOW_ALL_UP                                                      | 18  | 0.72821635 | 1.8161019 | 0.00182815 | 0.00219478 | 0.328 | 2661 tags=50%, list=11%, signal=56% |
| IGF1PATHWAY                                                         | 20  | 0.7237543  | 1.8158388 | 0.00373134 | 0.00237339 | 0.329 | 5118 tags=65%, list=18%, signal=78% |
| ABRAHAM_MM_VS_AL_UP                                                 | 19  | 0.73952895 | 1.8147545 | 0          | 0.00221694 | 0.335 | 3030 tags=58%, list=12%, signal=66% |
| MANALO_HYPOXIA_DN                                                   | 80  | 0.55413246 | 1.8140482 | 0          | 0.00224716 | 0.341 | 5243 tags=44%, list=21%, signal=55% |
| EGFPATHWAY                                                          | 27  | 0.68479115 | 1.8112559 | 0          | 0.00232544 | 0.354 | 5181 tags=56%, list=20%, signal=70% |
| HS045131_PATHOGENIC_ESCHERICHIA_COLI_INFECTION_EPEC                 | 52  | 0.6032113  | 1.8108817 | 0.0018018  | 0.00239262 | 0.359 | 2548 tags=49%, list=18%, signal=60% |
| HS045130_PATHOGENIC_ESCHERICHIA_COLI_INFECTION_EHEC                 | 51  | 0.6032113  | 1.8099877 | 0          | 0.00235694 | 0.359 | 2548 tags=43%, list=10%, signal=48% |
| HS045120_EPITHELIAL_CELL_SIGNALING_IN_HELICOBACTER_PYLORI_INFECTION | 67  | 0.570373   | 1.8094398 | 0          | 0.00236978 | 0.361 | 3841 tags=43%, list=15%, signal=51% |
| JISON_SICKLE_CELL                                                   | 31  | 0.6547976  | 1.8091326 | 0.00185185 | 0.00236694 | 0.361 | 2657 tags=39%, list=11%, signal=43% |
| HDAC1_COLON_BUT24HRS_UP                                             | 69  | 0.56637233 | 1.8084614 | 0.00173913 | 0.00236694 | 0.365 | 3606 tags=42%, list=19%, signal=54% |
| CXCR4PATHWAY                                                        | 24  | 0.6911953  | 1.8084401 | 0          | 0.00236589 | 0.362 | 3611 tags=50%, list=14%, signal=58% |
| ZELLER_MYC_UP                                                       | 24  | 0.6970999  | 1.8084207 | 0          | 0.00235773 | 0.362 | 4964 tags=67%, list=20%, signal=83% |
| MENSEN_MYC_UP                                                       | 29  | 0.6628009  | 1.8086997 | 0          | 0.0024017  | 0.368 | 5453 tags=69%, list=22%, signal=88% |
| ROS_MOUSE_AOR1_DN                                                   | 77  | 0.54754317 | 1.8058778 | 0          | 0.00242364 | 0.372 | 4454 tags=36%, list=10%, signal=40% |
| GLYCOGEN_METABOLISM                                                 | 34  | 0.6453088  | 1.8045838 | 0          | 0.00246326 | 0.378 | 5041 tags=50%, list=20%, signal=62% |
| CMV_24HRS_DN                                                        | 70  | 0.5654599  | 1.8030046 | 0          | 0.00253202 | 0.385 | 4427 tags=44%, list=18%, signal=54% |
| HS043050_PROTEASOME                                                 | 22  | 0.7038081  | 1.8027197 | 0          | 0.00255412 | 0.387 | 5443 tags=73%, list=22%, signal=93% |
| LINDSTEDT_DEND_UP                                                   | 50  | 0.596338   | 1.8014317 | 0          | 0.00261258 | 0.394 | 4046 tags=46%, list=18%, signal=57% |
| SA_B_CELL_RECEPTOR_COMPLEXES                                        | 24  | 0.68899584 | 1.8005438 | 0.00178891 | 0.00262411 | 0.394 | 4907 tags=58%, list=20%, signal=72% |
| HDAC1_COLON_CUR48HRS_UP                                             | 60  | 0.5794856  | 1.7979228 | 0          | 0.0027074  | 0.406 | 5213 tags=62%, list=21%, signal=78% |
| XU_ATRA_PLUSNSC_DN                                                  | 246 | 0.47849497 | 1.7970018 | 0          | 0.00277339 | 0.409 | 4423 tags=38%, list=18%, signal=45% |
| WNT_SIGNALING                                                       | 15  | 0.7664166  | 1.7959016 | 0          | 0.00277447 | 0.416 | 5766 tags=87%, list=19%, signal=98% |
| TAVOR_CEBP_UP                                                       | 60  | 0.5836642  | 1.7947481 | 0          | 0.00283089 | 0.425 | 2787 tags=33%, list=11%, signal=37% |
| WILLERT_WNT_NCCIT_ALL_UP                                            | 48  | 0.59738934 | 1.7943476 | 0.00188679 | 0.00284193 | 0.428 | 2263 tags=42%, list=9%, signal=46%  |
| FLECHNER_KIDNEY_TRANSPLANT_WELL_PBL_UP                              | 147 | 0.54107856 | 1.7931885 | 0          | 0.00287264 | 0.433 | 2221 tags=44%, list=9%, signal=49%  |
| HS040530_TIGHT_JUNCTION                                             | 18  | 0.5990525  | 1.7925044 | 0          | 0.00288848 | 0.435 | 4608 tags=43%, list=18%, signal=52% |
| ADIP_DIFF_CLUSTER3                                                  | 134 | 0.50871700 | 1.7910893 | 0          | 0.00292662 | 0.447 | 5378 tags=40%, list=17%, signal=48% |
| TGF_BETA_SIGNALING_PATHWAY                                          | 33  | 0.6435216  | 1.789664  | 0.00179533 | 0.00302896 | 0.453 | 4368 tags=58%, list=17%, signal=70% |
| RADMACHER_AMLNONALKARYTYPE_SIG                                      | 49  | 0.60651934 | 1.7896545 | 0.00190114 | 0.00303191 | 0.453 | 2821 tags=33%, list=11%, signal=37% |
| BCL2_FAMILY_AND_REG_NETWORK                                         | 72  | 0.5589593  | 1.789458  | 0          | 0.00302912 | 0.455 | 4573 tags=53%, list=18%, signal=64% |
| RASPATHWAY                                                          | 22  | 0.695453   | 1.7892337 | 0.0034904  | 0.00303095 | 0.457 | 4545 tags=50%, list=18%, signal=60% |
| JISON_SICKLE_CELL_DIFF                                              | 21  | 0.7008457  | 1.7885724 | 0.00557621 | 0.00304926 | 0.46  | 3453 tags=52%, list=14%, signal=61% |
| HYPERTRYPOXY_MODEL                                                  | 334 | 0.4629928  | 1.7882609 | 0          | 0.0030639  | 0.464 | 4665 tags=41%, list=19%, signal=50% |
| WERNER_FIBRO_DN                                                     | 160 | 0.7534171  | 1.7860044 | 0.00380228 | 0.00319986 | 0.474 | 1996 tags=65%, list=18%, signal=70% |
| UVC_HIGH_ALL_UP                                                     | 16  | 0.49981287 | 1.7843966 | 0          | 0.00329507 | 0.479 | 5128 tags=44%, list=18%, signal=50% |
| AGED_MOUSE_HIPPOCAMPUS_ANY_UP                                       | 19  | 0.7268118  | 1.7828668 | 0.00189036 | 0.00335907 | 0.495 | 1574 tags=42%, list=6%, signal=45%  |
| INSULINPATHWAY                                                      | 43  | 0.6000412  | 1.7823502 | 0          | 0.00335323 | 0.496 | 2307 tags=35%, list=9%, signal=38%  |
| STEFFEN_AML_PML_PLZF_TGRT                                           | 21  | 0.69214725 | 1.7813337 | 0.00178253 | 0.0033907  | 0.501 | 5118 tags=57%, list=20%, signal=72% |
| HSC_LATEPROGENITORS_ADULT                                           | 44  | 0.59510684 | 1.7805667 | 0.003599   | 0.0033907  | 0.502 | 5196 tags=27%, list=18%, signal=49% |
| NICK_RHAPC_UP                                                       | 436 | 0.45228374 | 1.7803442 | 0          | 0.00342029 | 0.505 | 4966 tags=37%, list=20%, signal=45% |
| DAC_BLADEDER_UP                                                     | 30  | 0.6469352  | 1.7803088 | 0.0037594  | 0.0033923  | 0.505 | 4334 tags=43%, list=16%, signal=52% |
| HDAC1_COLON_BUT12H_DN                                               | 28  | 0.6667161  | 1.7796527 | 0.00191205 | 0.00340059 | 0.508 | 2023 tags=43%, list=9%, signal=47%  |
| UVC_HIGH_D8_DN                                                      | 234 | 0.47627717 | 1.7783172 | 0          | 0.0034236  | 0.51  | 5209 tags=44%, list=18%, signal=50% |
| CCR5PATHWAY                                                         | 28  | 0.6646822  | 1.7772598 | 0.00178253 | 0.00349335 | 0.519 | 4661 tags=61%, list=19%, signal=74% |
| HSC_LATEPROGENITORS_SHARED                                          | 18  | 0.72275585 | 1.7762953 | 0.00194932 | 0.00353915 | 0.525 | 1777 tags=33%, list=7%, signal=36%  |
| HOFMANN_HDS_CD34_LOW_AND_HIGH_RISK                                  | 429 | 0.45289496 | 1.7754347 | 0          | 0.00357047 | 0.528 | 4966 tags=37%, list=20%, signal=45% |
| CELL_CYCLE_ARREST                                                   | 47  | 0.5961116  | 1.7751252 | 0          | 0.00358252 | 0.531 | 1777 tags=30%, list=10%, signal=35% |
| LEE_MYC_TGFA_UP                                                     | 31  | 0.65575284 | 1.7738849 | 0          | 0.00365545 | 0.543 | 3827 tags=45%, list=15%, signal=53% |
| DER_IFNB_UP                                                         | 59  | 0.57617134 | 1.7731153 | 0          | 0.00371501 | 0.552 | 3362 tags=42%, list=13%, signal=49% |
| ST_GAL3_PATHWAY                                                     | 93  | 0.5354725  | 1.7729717 | 0.00172117 | 0.00370828 | 0.553 | 3369 tags=37%, list=13%, signal=42% |
| ADOPTOGENESIS_HMSC_CLASS3_UP                                        | 35  | 0.62540559 | 1.7697953 | 0.00194553 | 0.00371501 | 0.562 | 6219 tags=69%, list=17%, signal=81% |
| APOTOTISIS_GENMAP                                                   | 62  | 0.5664107  | 1.7695541 | 0          | 0.00391596 | 0.576 | 5467 tags=53%, list=22%, signal=68% |
| CELLCYCLEPATHWAY                                                    | 42  | 0.60752696 | 1.7685574 | 0          | 0.00394122 | 0.579 | 4527 tags=57%, list=18%, signal=70% |
| HS045221_ACUTE_MYELOID_LEUKEMIA                                     | 23  | 0.6845789  | 1.7684045 | 0.00185529 | 0.00392935 | 0.579 | 3200 tags=43%, list=13%, signal=50% |
| HDAC1_COLON_CLUSTER7                                                | 53  | 0.58238065 | 1.7676659 | 0          | 0.00398487 | 0.582 | 4089 tags=42%, list=16%, signal=45% |
| TNFALPHA_30MIN_UP                                                   | 15  | 0.7428387  | 1.767154  | 0.0019084  | 0.00393804 | 0.582 | 2972 tags=47%, list=16%, signal=50% |
| BASSO_HCL_DIFF                                                      | 40  | 0.6069132  | 1.766181  | 0.00179533 | 0.00400335 | 0.59  | 3272 tags=45%, list=13%, signal=52% |
| NING_COPD_DN                                                        | 53  | 0.53873557 | 1.7614816 | 0          | 0.0042751  | 0.62  | 2419 tags=28%, list=10%, signal=31% |
| LEF_TCELLS1_UP                                                      | 121 | 0.515256   | 1.7602355 | 0          | 0.00437963 | 0.628 | 3827 tags=39%, list=15%, signal=46% |
| ITRANI_ADPROX_DN                                                    | 57  | 0.5696043  | 1.7601651 | 0          | 0.00437126 | 0.637 | 3184 tags=37%, list=18%, signal=47% |
| AGED_MOUSE_HIPPOCAMPUS_MULT_UP                                      | 19  | 0.7232567  | 1.7598271 | 0.00187617 | 0.0043984  | 0.631 | 2985 tags=53%, list=12%, signal=60% |
| DAC_PANC50_UP                                                       | 44  | 0.5947263  | 1.7594664 | 0          | 0.00441237 | 0.634 | 2278 tags=34%, list=9%, signal=37%  |
| LEE_TCELLS10_UP                                                     | 174 | 0.48258436 | 1.7592226 | 0          | 0.00440841 | 0.635 | 3945 tags=55%, list=16%, signal=71% |
| RIBOSOMAL_PROTEINS                                                  | 88  | 0.53636291 | 1.7574422 | 0          | 0.00452459 | 0.64  | 5453 tags=36%, list=18%, signal=47% |
| OLDWERNER_FIBRO_UP                                                  | 19  | 0.72254944 | 1.75718   | 0.00366972 | 0.00452047 | 0.644 | 3063 tags=58%, list=12%, signal=66% |
| BRG1_ALAB_UP                                                        | 40  | 0.6120116  | 1.7566    |            |            |       |                                     |

|                                                         |     |            |           |            |            |       |      |                                 |
|---------------------------------------------------------|-----|------------|-----------|------------|------------|-------|------|---------------------------------|
| HANSON_NFKAPPB_IND                                      | 18  | 0.708586   | 1.7227672 | 0.00749064 | 0.00645628 | 0.801 | 2625 | tags=39%, list=10%, signal=43%  |
| MTORPATHWAY                                             | 22  | 0.6718085  | 1.7218733 | 0.00394477 | 0.00652996 | 0.804 | 6362 | tags=77%, list=25%, signal=103% |
| IFN_BETA_GLIOMA_DN                                      | 42  | 0.5964663  | 1.720899  | 0.00184502 | 0.00704112 | 0.807 | 3070 | tags=43%, list=10%, signal=49%  |
| TPA_RESIST_MIDDLE_DN                                    | 109 | 0.50138724 | 1.7206128 | 0          | 0.00658692 | 0.809 | 5089 | tags=44%, list=20%, signal=55%  |
| ZHAN_MM_MOLECULAR_CLASSI_DN                             | 46  | 0.5811705  | 1.717947  | 0.00179533 | 0.00686432 | 0.822 | 3885 | tags=35%, list=15%, signal=41%  |
| HDAC1_COLON_BUT16HRS_UP                                 | 41  | 0.5941353  | 1.716112  | 0          | 0.00700945 | 0.832 | 3252 | tags=44%, list=13%, signal=50%  |
| MATSUDA_VALPHAKINT_DIFF                                 | 402 | 0.43741652 | 1.7159786 | 0          | 0.00700303 | 0.833 | 3206 | tags=30%, list=15%, signal=43%  |
| VIPPATHWAY                                              | 27  | 0.64852333 | 1.7158551 | 0.00186567 | 0.00700473 | 0.833 | 3668 | tags=44%, list=15%, signal=52%  |
| ET743_RESIST_DN                                         | 40  | 0.5858864  | 1.7157241 | 0.0019305  | 0.00699449 | 0.834 | 3838 | tags=45%, list=15%, signal=54%  |
| CHIARETTI_T_ALL_DIFF                                    | 258 | 0.4557496  | 1.7156636 | 0          | 0.00698055 | 0.834 | 3610 | tags=35%, list=14%, signal=40%  |
| GENOTOXINS_24HRS_DISCR                                  | 39  | 0.5931986  | 1.7156047 | 0.00589391 | 0.00696673 | 0.834 | 3469 | tags=56%, list=22%, signal=72%  |
| BRCA_BRCA1_POS                                          | 101 | 0.5099945  | 1.7146239 | 0          | 0.0070411  | 0.836 | 4152 | tags=36%, list=12%, signal=49%  |
| TRN1PATHWAY                                             | 28  | 0.6462937  | 1.7145214 | 0.00559702 | 0.00702708 | 0.836 | 3471 | tags=46%, list=14%, signal=54%  |
| OXSTRESS_BREASTCA_UP                                    | 27  | 0.6474071  | 1.7144907 | 0.00716846 | 0.00701682 | 0.837 | 670  | tags=30%, list=3%, signal=30%   |
| ATLRPATHWAY                                             | 34  | 0.60522284 | 1.7144572 | 0.00175747 | 0.00700687 | 0.837 | 1954 | tags=38%, list=8%, signal=41%   |
| CELL_MOTILITY                                           | 106 | 0.5034483  | 1.7139978 | 0          | 0.00703873 | 0.838 | 2437 | tags=29%, list=10%, signal=38%  |
| LEE_E2F1_UP                                             | 59  | 0.5533925  | 1.7123518 | 0          | 0.007128   | 0.84  | 3108 | tags=37%, list=12%, signal=42%  |
| DAC_PANC_UP                                             | 361 | 0.44317648 | 1.7121248 | 0          | 0.00712165 | 0.84  | 2402 | tags=20%, list=10%, signal=22%  |
| BRCA_PROGNOSIS_NEG                                      | 87  | 0.5154575  | 1.7116624 | 0          | 0.0071378  | 0.842 | 5202 | tags=47%, list=21%, signal=59%  |
| KIM_TH_CELLS_UP                                         | 43  | 0.5846967  | 1.7113221 | 0.00362319 | 0.00716098 | 0.845 | 3668 | tags=42%, list=15%, signal=49%  |
| HADDAD_HPCLYMPHO_ENRICHED                               | 267 | 0.45828533 | 1.7112876 | 0          | 0.00714694 | 0.845 | 4852 | tags=36%, list=19%, signal=44%  |
| LIAN_MYELOID_DIFF_FT                                    | 34  | 0.6078077  | 1.7105985 | 0.00184162 | 0.00719334 | 0.847 | 2975 | tags=50%, list=12%, signal=57%  |
| TENEDINI_MEGAKARYOCYTIC_GENES                           | 53  | 0.564804   | 1.7103169 | 0          | 0.00719759 | 0.848 | 2617 | tags=28%, list=10%, signal=32%  |
| PTDINSIPATHWAY                                          | 22  | 0.67916286 | 1.7102051 | 0.0019408  | 0.00719474 | 0.851 | 5069 | tags=50%, list=20%, signal=63%  |
| AGED_MOUSE_HYPOTH_UP                                    | 43  | 0.5895164  | 1.7101386 | 0          | 0.00718477 | 0.852 | 4253 | tags=49%, list=17%, signal=59%  |
| HADDAD_CD45CD7_PLUS_VS_MINUS_DN                         | 76  | 0.53069055 | 1.7055433 | 0.00541516 | 0.00760223 | 0.876 | 5336 | tags=45%, list=21%, signal=65%  |
| NELSON_ANDROGEN_UP                                      | 62  | 0.54954904 | 1.7043442 | 0.00188679 | 0.00768403 | 0.878 | 3571 | tags=40%, list=14%, signal=47%  |
| CMV_8HRS_DN                                             | 44  | 0.58395797 | 1.7026412 | 0          | 0.00764998 | 0.879 | 3827 | tags=36%, list=14%, signal=45%  |
| KANG_TERT_UP                                            | 82  | 0.52455354 | 1.7022743 | 0          | 0.00788584 | 0.884 | 3641 | tags=38%, list=14%, signal=44%  |
| CMV-UV_HCMV_6HRS_UP                                     | 118 | 0.49366722 | 1.7012135 | 0          | 0.00795944 | 0.89  | 4895 | tags=40%, list=19%, signal=49%  |
| ERYTHPATHWAY                                            | 15  | 0.7269006  | 1.7010244 | 0.00587084 | 0.00794749 | 0.89  | 1996 | tags=27%, list=8%, signal=29%   |
| HSOA4310_WNT_SIGNALING_PATHWAY                          | 23  | 0.4760688  | 1.7003417 | 0          | 0.0079498  | 0.89  | 3187 | tags=27%, list=10%, signal=32%  |
| FSH GRANULOSA_UP                                        | 77  | 0.52509946 | 1.6986263 | 0.00168067 | 0.00813539 | 0.901 | 4205 | tags=48%, list=17%, signal=58%  |
| CHIARETTI_T_ALL                                         | 236 | 0.45207253 | 1.698322  | 0          | 0.00816684 | 0.902 | 2656 | tags=30%, list=11%, signal=33%  |
| VEGF_MMMEC_6HRS_UP                                      | 49  | 0.56794626 | 1.6975577 | 0.00346021 | 0.00824507 | 0.903 | 1781 | tags=33%, list=7%, signal=35%   |
| VENTRICLES_UP                                           | 193 | 0.46825662 | 1.6968326 | 0          | 0.00829113 | 0.903 | 5338 | tags=40%, list=20%, signal=54%  |
| ESR_FIBROBLAST_DN                                       | 18  | 0.6949327  | 1.6967995 | 0.00553506 | 0.00828566 | 0.905 | 5114 | tags=61%, list=20%, signal=77%  |
| PROTEASOME_DEGRADATION                                  | 32  | 0.6120799  | 1.6960618 | 0.00182149 | 0.00831246 | 0.905 | 5162 | tags=63%, list=21%, signal=79%  |
| HEARTFAILURE_ATTRIA_DN                                  | 107 | 0.4977936  | 1.6951052 | 0          | 0.00837898 | 0.906 | 5317 | tags=51%, list=21%, signal=65%  |
| BAF57_BTF49_UP                                          | 22  | 0.45978415 | 1.694984  | 0          | 0.00838756 | 0.908 | 5069 | tags=50%, list=20%, signal=63%  |
| LINDSTEDT_DEND_8H_VS_48H_UP                             | 66  | 0.54537244 | 1.6940879 | 0.00184502 | 0.00845029 | 0.91  | 1023 | tags=26%, list=4%, signal=27%   |
| UVB_NHEK4_6HRS_UP                                       | 26  | 0.6324222  | 1.6908504 | 0          | 0.00877931 | 0.92  | 4261 | tags=58%, list=17%, signal=69%  |
| ABRAHAM_AL_VS_MM_UP                                     | 23  | 0.6588734  | 1.6901956 | 0.00374532 | 0.00881611 | 0.921 | 2616 | tags=39%, list=10%, signal=44%  |
| ABRAHAM_MM_VS_AL_DN                                     | 22  | 0.667689   | 1.6898738 | 0.01123596 | 0.00883803 | 0.922 | 2616 | tags=41%, list=10%, signal=46%  |
| TAKEDA_NURP_HOXA9_GH_DN                                 | 37  | 0.5267794  | 1.6886835 | 0.00369686 | 0.00894798 | 0.925 | 2310 | tags=30%, list=14%, signal=37%  |
| OLD_FIBRO_DN                                            | 151 | 0.47729295 | 1.6884862 | 0          | 0.00895788 | 0.927 | 5128 | tags=39%, list=20%, signal=49%  |
| SIG_PIP3_SIGNALING_IN_CARDIAC_MYOCYTES                  | 65  | 0.5327793  | 1.6880794 | 0.00170648 | 0.00899828 | 0.93  | 2378 | tags=32%, list=9%, signal=36%   |
| OLDWERNER_FIBRO_DN                                      | 100 | 0.49898943 | 1.6873232 | 0          | 0.00902665 | 0.933 | 5128 | tags=43%, list=20%, signal=54%  |
| OXSTRESS_IRF_HJNETH1_DN                                 | 46  | 0.5655511  | 1.6873032 | 0.01022147 | 0.00906162 | 0.933 | 3468 | tags=39%, list=14%, signal=45%  |
| TPA_SENS_MIDDLE_UP                                      | 66  | 0.5336318  | 1.6865509 | 0          | 0.00913905 | 0.937 | 3668 | tags=41%, list=15%, signal=48%  |
| PROTEASOME                                              | 17  | 0.7009165  | 1.6857573 | 0.00551471 | 0.0091777  | 0.938 | 5980 | tags=82%, list=24%, signal=108% |
| HSOA5214_GLIOMA                                         | 64  | 0.5368126  | 1.6851085 | 0          | 0.00920533 | 0.938 | 4089 | tags=34%, list=16%, signal=41%  |
| HDAC1_COLON_BUT12HRS_UP                                 | 44  | 0.5603901  | 1.6847218 | 0.00368324 | 0.0092617  | 0.939 | 1472 | tags=36%, list=14%, signal=42%  |
| MAMMARY_DEV_UP                                          | 55  | 0.5489816  | 1.6846159 | 0.00171821 | 0.00920841 | 0.939 | 3462 | tags=33%, list=14%, signal=38%  |
| TRNA_SYNTHETASES                                        | 20  | 0.68289614 | 1.6844883 | 0.00763359 | 0.00919791 | 0.939 | 4602 | tags=75%, list=18%, signal=92%  |
| P53PATHWAY                                              | 16  | 0.70543975 | 1.6844418 | 0.00756144 | 0.00918029 | 0.939 | 4151 | tags=50%, list=17%, signal=60%  |
| ADDYA_K562_HEMIN_TREATMENT                              | 66  | 0.5380475  | 1.6842717 | 0.00170876 | 0.00916976 | 0.939 | 2281 | tags=33%, list=14%, signal=37%  |
| GLEEVECPATHWAY                                          | 22  | 0.5511681  | 1.6841569 | 0.00572519 | 0.00916245 | 0.939 | 4151 | tags=50%, list=17%, signal=60%  |
| HIVNEFPATHWAY                                           | 55  | 0.4664653  | 1.6831013 | 0.00355872 | 0.00925947 | 0.94  | 4325 | tags=47%, list=17%, signal=57%  |
| GCRPATHWAY                                              | 17  | 0.7006665  | 1.6820902 | 0.00732601 | 0.00931398 | 0.941 | 1819 | tags=35%, list=7%, signal=38%   |
| UVB_NHEK3_C6                                            | 27  | 0.64682084 | 1.6820051 | 0.00545455 | 0.00930313 | 0.941 | 4132 | tags=52%, list=20%, signal=66%  |
| HADDAD_HSC_CD10_UP                                      | 254 | 0.44490317 | 1.6813107 | 0          | 0.00934338 | 0.942 | 4852 | tags=34%, list=19%, signal=42%  |
| HIPPOCAMPUS_DEVELOPMENT_NEONATAL                        | 26  | 0.63674384 | 1.6799735 | 0.0019305  | 0.0094621  | 0.943 | 3083 | tags=35%, list=12%, signal=39%  |
| LEE_DENA_UP                                             | 59  | 0.5362821  | 1.6797788 | 0.00173913 | 0.00945828 | 0.944 | 2895 | tags=34%, list=12%, signal=38%  |
| OLD_FIBRO_UP                                            | 46  | 0.5385558  | 1.6788635 | 0.00181408 | 0.00953554 | 0.944 | 3282 | tags=48%, list=18%, signal=58%  |
| AGED_MOUSE_NEOCORTEX_UP                                 | 66  | 0.5245727  | 1.6781412 | 0.0017301  | 0.00965239 | 0.948 | 4445 | tags=39%, list=18%, signal=48%  |
| LE_MYELIN_UP                                            | 88  | 0.5151295  | 1.6778897 | 0          | 0.00965794 | 0.949 | 3760 | tags=33%, list=15%, signal=39%  |
| HSF2PATHWAY                                             | 15  | 0.72048175 | 1.677041  | 0.00747664 | 0.00977381 | 0.951 | 4453 | tags=67%, list=18%, signal=81%  |
| GH_GHRH_KO_6HRS_UP                                      | 68  | 0.5284502  | 1.6730418 | 0.00181315 | 0.00960512 | 0.951 | 5256 | tags=43%, list=20%, signal=54%  |
| HSC_MATURE_ADULT                                        | 316 | 0.4370583  | 1.6725228 | 0          | 0.01020086 | 0.957 | 3452 | tags=28%, list=14%, signal=32%  |
| HDAC1_COLON_CUR24HRS_UP                                 | 35  | 0.59512186 | 1.670964  | 0.00186567 | 0.01039252 | 0.958 | 5118 | tags=63%, list=20%, signal=79%  |
| HASLINGER_B CLL_13Q14                                   | 19  | 0.67781633 | 1.6698241 | 0.00585938 | 0.01053647 | 0.959 | 2970 | tags=37%, list=12%, signal=42%  |
| UV-CMV_UNIQUE_HCMV_6HRS_DN                              | 77  | 0.5139133  | 1.6678748 | 0          | 0.01073701 | 0.961 | 4602 | tags=35%, list=18%, signal=43%  |
| HS3_FIBRO_C4                                            | 46  | 0.6808891  | 1.6678479 | 0.00567108 | 0.01071919 | 0.961 | 2256 | tags=39%, list=14%, signal=45%  |
| LH GRANULOSA_UP                                         | 79  | 0.51511616 | 1.6668668 | 0          | 0.01080234 | 0.961 | 4205 | tags=47%, list=17%, signal=56%  |
| HSOA4012_ERBB_SIGNALING_PATHWAY                         | 87  | 0.49984616 | 1.6653562 | 0          | 0.01099633 | 0.963 | 5014 | tags=41%, list=20%, signal=52%  |
| E2F3_ONCOGENIC_SIGNATURE                                | 225 | 0.45274857 | 1.6644491 | 0          | 0.01102886 | 0.965 | 5687 | tags=39%, list=23%, signal=50%  |
| DROS_BRAIN_2WKS_UP                                      | 47  | 0.5603901  | 1.6635288 | 0.00177305 | 0.01113126 | 0.967 | 2703 | tags=39%, list=14%, signal=45%  |
| ALCALAY_AML_NPMC_UP                                     | 131 | 0.4745711  | 1.6633536 | 0          | 0.01111264 | 0.97  | 4789 | tags=41%, list=19%, signal=51%  |
| LI_FETAL_VS_WT_KIDNEY_UP                                | 175 | 0.45974106 | 1.6628684 | 0          | 0.0111836  | 0.971 | 2636 | tags=27%, list=10%, signal=30%  |
| ZHAN_MMPK_SIM_BC_AND_MM                                 | 44  | 0.57295144 | 1.6624744 | 0          | 0.0112121  | 0.971 | 5588 | tags=52%, list=22%, signal=67%  |
| UEDA_MOUSE_SCN                                          | 81  | 0.5096566  | 1.6624697 | 0.00172117 | 0.01118799 | 0.971 | 4978 | tags=43%, list=17%, signal=49%  |
| HYPOXIA_RCC_NOVHL_UP                                    | 62  | 0.5328584  | 1.6620603 | 0          | 0.01124335 | 0.971 | 2762 | tags=35%, list=11%, signal=40%  |
| APOPTOSIS_KEGG                                          | 49  | 0.5640094  | 1.6612136 | 0.00180832 | 0.01133318 | 0.972 | 4453 | tags=49%, list=18%, signal=59%  |
| HDAC1_COLON_BUT12HRS_DN                                 | 72  | 0.522111   | 1.6607891 | 0.00340716 | 0.01136455 | 0.973 | 4957 | tags=46%, list=20%, signal=57%  |
| APOPTOSIS                                               | 67  | 0.52769274 | 1.6603133 | 0          | 0.01140811 | 0.973 | 4466 | tags=45%, list=17%, signal=54%  |
| WNTPATHWAY                                              | 25  | 0.6335768  | 1.6599281 | 0.01509434 | 0.01142268 | 0.976 | 4205 | tags=40%, list=17%, signal=48%  |
| WELCHS_BRCA_UP                                          | 39  | 0.57080626 | 1.6598452 | 0.00377359 | 0.01140793 | 0.976 | 3198 | tags=35%, list=13%, signal=47%  |
| UCALPAINPATHWAY                                         | 17  | 0.7096781  | 1.6595173 | 0.00738007 | 0.0114146  | 0.976 | 3422 | tags=53%, list=14%, signal=61%  |
| NCIFPATHWAY                                             | 19  | 0.6690075  | 1.6571914 | 0.01168126 | 0.01158136 | 0.978 | 6209 | tags=68%, list=20%, signal=84%  |
| HOFMANN_MANTLE_LYMPHOMA_VS_LYMPH_NODES_DN               | 47  | 0.5580507  | 1.6567934 | 0.00177936 | 0.01171778 | 0.979 | 2700 | tags=34%, list=11%, signal=38%  |
| REN_E2F1_TARGETS                                        | 38  | 0.58043146 | 1.6547432 | 0.01088929 | 0.01198265 | 0.979 | 3415 | tags=37%, list=14%, signal=43%  |
| PASSERINI_INFLAMMATION                                  | 24  | 0.6397561  | 1.6527739 | 0.00572519 | 0.01220711 | 0.98  | 3790 | tags=54%, list=15%, signal=64%  |
| HSOA3022_BASAL_TRANSCRIPTION_FACTORS                    | 32  | 0.6628129  | 1.6519686 | 0.00365633 | 0.01247438 | 0.983 | 7206 | tags=75%, list=20%, signal=93%  |
| GOLDRATH_HP                                             | 144 | 0.46743512 | 1.6493907 | 0          | 0.01254174 | 0.983 | 5643 | tags=42%, list=22%, signal=54%  |
| DEATHPATHWAY                                            | 33  | 0.5844666  | 1.6493183 | 0.00356506 | 0.01252513 | 0.983 | 4325 | tags=48%, list=17%, signal=58%  |
| EPOPATHWAY                                              | 19  | 0.66379094 | 1.6489323 | 0.01862197 | 0.01258762 | 0.983 | 5118 | tags=58%, list=20%, signal=73%  |
| HSOA4810_REGULATION_OF_ACTIN_CYTOSKELETON               | 203 | 0.48408412 | 1.6483144 | 0          | 0.01263738 | 0.983 | 4089 | tags=32%, list=16%, signal=38%  |
| PARK_RARALPHA_MOD                                       | 60  | 0.52231085 | 1.6447046 | 0          | 0.01307447 | 0.984 | 1646 | tags=25%, list=7%, signal=27%   |
| YAGI_AML_PROG_ASSOC                                     | 120 | 0.47772025 | 1.6446258 | 0.00162075 | 0.01305679 | 0.984 | 4652 | tags=44%, list=18%, signal=54%  |
| BRCA1_SW480_DN                                          | 17  | 0.67961365 | 1.6440837 | 0.01330799 | 0.01307985 | 0.984 | 3404 | tags=41%, list=14%, signal=48%  |
| ADIP_DIFF_CLUSTER4                                      | 34  | 0.59578575 | 1.644032  | 0.00353982 | 0.0130668  | 0.984 | 5282 | tags=50%, list=21%, signal=63%  |
| PC5HYPXAPATHWAY                                         | 19  | 0.6628975  | 1.640477  | 0.0188329  | 0.0135472  | 0.986 | 2205 | tags=37%, list=12%, signal=42%  |
| IGLESIAS_E2FMINUS_UP                                    | 138 | 0.47110742 | 1.6406838 | 0          | 0.0135319  | 0.986 | 3070 | tags=34%, list=12%, signal=39%  |
| SIG_REGULATION_OF_THE_ACTIN_CYTOSKELETON_BY_RHO_GTPASES | 35  | 0.5812761  | 1.6398825 | 0.00922509 | 0.01367215 | 0.987 | 5050 | tags=49%, list=20%, signal=61%  |
| SANSON_APC                                              |     |            |           |            |            |       |      |                                 |

|                                          |     |            |           |            |            |       |      |                                 |
|------------------------------------------|-----|------------|-----------|------------|------------|-------|------|---------------------------------|
| ET743_SARCOMA_UP                         | 64  | 0.5068681  | 1.6014864 | 0.00368324 | 0.01872273 | 0.999 | 3395 | tags=38%, list=13%, signal=42%  |
| TSADAC_PANC50_UP                         | 41  | 0.55402154 | 1.6003743 | 0.00556586 | 0.01893527 | 0.999 | 2864 | tags=29%, list=11%, signal=33%  |
| JNK_UP                                   | 31  | 0.5973783  | 1.5997210 | 0.00736649 | 0.01903353 | 0.999 | 2698 | tags=39%, list=10%, signal=44%  |
| SERUM_FIBROBLAST_CELLCYCLE               | 129 | 0.45955634 | 1.599494  | 0.00316957 | 0.01903224 | 0.999 | 4562 | tags=26%, list=18%, signal=32%  |
| IFN_ALL_UP                               | 18  | 0.65550905 | 1.5992167 | 0.01526718 | 0.01903968 | 0.999 | 2555 | tags=39%, list=10%, signal=43%  |
| JECHLINGER_EMT_UP                        | 54  | 0.52460635 | 1.5987529 | 0.00877193 | 0.01910853 | 0.999 | 4201 | tags=44%, list=17%, signal=53%  |
| IGF1RPATHWAY                             | 15  | 0.66811866 | 1.5985993 | 0.00431744 | 0.01910874 | 0.999 | 4907 | tags=60%, list=20%, signal=74%  |
| CALCINEURINPATHWAY                       | 19  | 0.6431034  | 1.5983986 | 0.01590457 | 0.01911368 | 0.999 | 2830 | tags=32%, list=11%, signal=36%  |
| UV-CMV_UNIQUE_HCMV_6HRS_UP               | 101 | 0.4753075  | 1.5976845 | 0          | 0.01923525 | 0.999 | 4895 | tags=40%, list=19%, signal=49%  |
| HIPPOCAMPUS_DEVELOPMENT_PRENATAL         | 32  | 0.57304585 | 1.5967075 | 0.01612903 | 0.01937794 | 0.999 | 4894 | tags=53%, list=19%, signal=66%  |
| SA_GI_AND_S_PHASES                       | 15  | 0.6820643  | 1.596652  | 0.02398524 | 0.01936197 | 0.999 | 3642 | tags=47%, list=14%, signal=55%  |
| CMV_HCMV_TIMECOURSE_8HRS_DN              | 56  | 0.69010353 | 1.595173  | 0.02119461 | 0.01965966 | 0.999 | 4567 | tags=47%, list=24%, signal=100% |
| TELPATHWAY                               | 15  | 0.6918701  | 1.5951359 | 0.02411874 | 0.0196403  | 0.999 | 2194 | tags=40%, list=9%, signal=44%   |
| HDAC1_COLON_BUT16HRS_UP                  | 92  | 0.477533   | 1.5934587 | 0.00169205 | 0.01994115 | 0.999 | 3400 | tags=33%, list=14%, signal=38%  |
| BCRPATHWAY                               | 35  | 0.56947964 | 1.5931699 | 0.01243339 | 0.01995466 | 0.999 | 1954 | tags=29%, list=8%, signal=31%   |
| HSC_LTHSC_ADULT                          | 346 | 0.41101065 | 1.5920954 | 0          | 0.01993781 | 0.999 | 4579 | tags=31%, list=18%, signal=34%  |
| FALT_BCLL_IG_MUTATED_VS_WT_DN            | 43  | 0.5488349  | 1.5907708 | 0.0036036  | 0.02073635 | 0.999 | 4463 | tags=47%, list=18%, signal=56%  |
| MUNSHI_MM_UP                             | 66  | 0.5056777  | 1.5906805 | 0.01071429 | 0.02036694 | 0.999 | 5340 | tags=50%, list=21%, signal=63%  |
| SHEPARD_NEG_REG_OF_CELL_PROLIFERATION    | 108 | 0.46346977 | 1.5904819 | 0.0017094  | 0.02038459 | 0.999 | 4629 | tags=31%, list=18%, signal=38%  |
| PITUITARY_FETAL_UP                       | 17  | 0.6520764  | 1.5902983 | 0.02376238 | 0.02037852 | 0.999 | 5901 | tags=47%, list=23%, signal=61%  |
| CMV_I86_UP                               | 50  | 0.52535865 | 1.5902714 | 0.01546392 | 0.02034456 | 0.999 | 4602 | tags=44%, list=24%, signal=58%  |
| HDAC1_COLON_BUT16HRS_DN                  | 102 | 0.4681224  | 1.5901251 | 0.00166667 | 0.02032972 | 0.999 | 5063 | tags=45%, list=20%, signal=56%  |
| HOFFMANN_BIVSIII_BI_TABLE2               | 192 | 0.43045997 | 1.586165  | 0          | 0.021114   | 0.999 | 4155 | tags=28%, list=17%, signal=33%  |
| CARM_ERPATHWAY                           | 27  | 0.5921379  | 1.5852101 | 0.01645398 | 0.02132521 | 0.999 | 5863 | tags=48%, list=23%, signal=63%  |
| FERNANDEZ_MYC_TARGETS                    | 172 | 0.44282252 | 1.5845326 | 0          | 0.02140075 | 0.999 | 3422 | tags=27%, list=14%, signal=31%  |
| HDAC1_COLON_TSA_UP                       | 108 | 0.46179155 | 1.5838236 | 0          | 0.02151563 | 0.999 | 2544 | tags=28%, list=10%, signal=31%  |
| IDX_TSA_DN_CLUSTER4                      | 26  | 0.59771806 | 1.5804923 | 0.01459854 | 0.02213396 | 0.999 | 4124 | tags=54%, list=16%, signal=64%  |
| PROTEASOMEPATHWAY                        | 21  | 0.6219527  | 1.5775548 | 0.01845838 | 0.0227363  | 1     | 5980 | tags=76%, list=25%, signal=89%  |
| LEE_MYC_E2F1_UP                          | 53  | 0.51483417 | 1.5739474 | 0.01272727 | 0.02352076 | 1     | 2324 | tags=32%, list=13%, signal=35%  |
| HS40271_METHIONINE_METABOLISM            | 18  | 0.6397296  | 1.5722215 | 0.01330799 | 0.02390595 | 1     | 3242 | tags=39%, list=13%, signal=45%  |
| UNDERHILL_PROLIFERATION                  | 18  | 0.6353768  | 1.5721992 | 0.01886793 | 0.02386372 | 1     | 5773 | tags=61%, list=23%, signal=79%  |
| CREB_BRAIN_BWS_DN                        | 46  | 0.52457538 | 1.5720806 | 0.02281369 | 0.0237718  | 1     | 3635 | tags=35%, list=15%, signal=47%  |
| ZHAN_MULTIPLE_MYELOMA_VS_NORMAL_UP       | 62  | 0.5077916  | 1.5719552 | 0.0034188  | 0.02381447 | 1     | 5197 | tags=44%, list=21%, signal=55%  |
| BRENTANI_CYTOSKELETON                    | 19  | 0.62579995 | 1.5701253 | 0.01734104 | 0.02423529 | 1     | 2080 | tags=32%, list=8%, signal=34%   |
| BLEO_HUMAN_LYMPH_HIGH_24HRS_UP           | 89  | 0.4746543  | 1.5691733 | 0          | 0.02443869 | 1     | 4871 | tags=46%, list=19%, signal=57%  |
| UV_CLOW_C3_DN                            | 107 | 0.46468324 | 1.5688174 | 0.01775523 | 0.02497846 | 1     | 4029 | tags=42%, list=20%, signal=50%  |
| CMV_HCMV_TIMECOURSE_48HRS_DN             | 105 | 0.4652098  | 1.5666784 | 0.00671141 | 0.02494928 | 1     | 5042 | tags=42%, list=20%, signal=52%  |
| FLOTTHO_CASP8AP2_MRD_DIFF                | 72  | 0.4933495  | 1.5654536 | 0.00177936 | 0.02519257 | 1     | 4481 | tags=43%, list=19%, signal=53%  |
| ALZHEIMERS_INCIPIENT_UP                  | 331 | 0.40405595 | 1.5653769 | 0          | 0.02518329 | 1     | 4830 | tags=33%, list=18%, signal=39%  |
| OXSTRESS_RETPOW_DN                       | 107 | 0.46539168 | 1.5653132 | 0          | 0.02515785 | 1     | 5048 | tags=42%, list=27%, signal=60%  |
| GLYCOLYSIS                               | 53  | 0.51197106 | 1.564907  | 0.00541516 | 0.02517778 | 1     | 3008 | tags=32%, list=12%, signal=36%  |
| KANNAN_P53_DN                            | 15  | 0.66666263 | 1.5644927 | 0.01744186 | 0.02521596 | 1     | 3801 | tags=47%, list=15%, signal=55%  |
| TGFBETA_LATE_UP                          | 33  | 0.57088625 | 1.5641949 | 0.00540541 | 0.02523806 | 1     | 2671 | tags=39%, list=11%, signal=44%  |
| HCMVPATHWAY                              | 16  | 0.6645945  | 1.5638964 | 0.02557486 | 0.02526785 | 1     | 3699 | tags=44%, list=15%, signal=51%  |
| SPRYPATHWAY                              | 18  | 0.63310447 | 1.5630876 | 0.0281369  | 0.02547116 | 1     | 4907 | tags=44%, list=15%, signal=47%  |
| ADIP_DIFF_CLUSTER1                       | 55  | 0.5148237  | 1.5629277 | 0.00728597 | 0.02545968 | 1     | 3834 | tags=36%, list=15%, signal=43%  |
| NUCLEOTIDE_METABOLISM                    | 15  | 0.66706884 | 1.5626082 | 0.02697842 | 0.025507   | 1     | 5374 | tags=53%, list=21%, signal=68%  |
| ZHANG_EFT_EWISPL1_UP                     | 5   | 0.4736544  | 1.5613056 | 0.00340716 | 0.02572215 | 1     | 3094 | tags=34%, list=12%, signal=39%  |
| MITOCHONDRIONPATHWAY                     | 20  | 0.62866175 | 1.5611616 | 0.02772543 | 0.02570722 | 1     | 5471 | tags=60%, list=20%, signal=77%  |
| HTEK_UP                                  | 66  | 0.4941358  | 1.5607352 | 0.0071048  | 0.02576438 | 1     | 4132 | tags=36%, list=16%, signal=43%  |
| ZHAN_MM_CD138_MS_VS_REST                 | 43  | 0.5292159  | 1.5599074 | 0.01492537 | 0.02616534 | 1     | 3623 | tags=37%, list=14%, signal=43%  |
| UV_4NQO_FIBRO_DN                         | 27  | 0.5688492  | 1.557734  | 0.0162162  | 0.02636386 | 1     | 4154 | tags=41%, list=17%, signal=49%  |
| AGING_BRAIN_DN                           | 118 | 0.44755352 | 1.555818  | 0.017331   | 0.02678462 | 1     | 5056 | tags=42%, list=19%, signal=50%  |
| CELL_CYCLE_REGULATOR                     | 22  | 0.6278006  | 1.5553993 | 0.0261194  | 0.02685467 | 1     | 4261 | tags=50%, list=17%, signal=60%  |
| FRASOR_ER_UP                             | 29  | 0.58493036 | 1.5540504 | 0.00550459 | 0.02713554 | 1     | 2225 | tags=34%, list=9%, signal=38%   |
| IL6_SCAR_FIBRO_UP                        | 24  | 0.5953139  | 1.5540307 | 0.01971326 | 0.02709482 | 1     | 4336 | tags=46%, list=17%, signal=55%  |
| FRASOR_ER_DN                             | 60  | 0.5024794  | 1.5532049 | 0.01484851 | 0.02745167 | 1     | 1927 | tags=35%, list=12%, signal=37%  |
| RHOPATHWAY                               | 30  | 0.55240774 | 1.5512955 | 0.02540835 | 0.027675   | 1     | 5054 | tags=50%, list=20%, signal=62%  |
| RELAPATHWAY                              | 16  | 0.6589134  | 1.5489072 | 0.03041825 | 0.02825468 | 1     | 3426 | tags=50%, list=14%, signal=58%  |
| ZHAN_MM_CD138_LB_VS_REST                 | 35  | 0.5360351  | 1.5473361 | 0.01751314 | 0.02863402 | 1     | 2514 | tags=34%, list=10%, signal=38%  |
| KENNY_WNT_DN                             | 44  | 0.53594345 | 1.5458523 | 0.01645523 | 0.02901748 | 1     | 5105 | tags=49%, list=20%, signal=64%  |
| PYRUVATE_METABOLISM                      | 37  | 0.5472911  | 1.5439043 | 0.01604278 | 0.02946273 | 1     | 4744 | tags=43%, list=19%, signal=53%  |
| ZMPSTE24_KO_UP                           | 32  | 0.55263084 | 1.5435735 | 0.02803738 | 0.02948919 | 1     | 3026 | tags=34%, list=12%, signal=39%  |
| DORSAM_HOXA9_UP                          | 33  | 0.55863975 | 1.5407369 | 0.01083033 | 0.03027143 | 1     | 4875 | tags=61%, list=19%, signal=75%  |
| TUMOR_SUPPRESSOR                         | 24  | 0.59161884 | 1.5399683 | 0.02667663 | 0.03027416 | 1     | 6778 | tags=58%, list=27%, signal=80%  |
| CANTHARIDIN_DN                           | 48  | 0.5175854  | 1.5395688 | 0.00874126 | 0.03038638 | 1     | 4221 | tags=46%, list=19%, signal=54%  |
| GLYCOLYSIS_AND_GLUONEOGENESIS            | 43  | 0.52666494 | 1.5390177 | 0.01598579 | 0.03056089 | 1     | 4587 | tags=44%, list=18%, signal=54%  |
| TSA_PANC50_UP                            | 32  | 0.5289659  | 1.5369636 | 0.00952381 | 0.03106587 | 1     | 2202 | tags=32%, list=9%, signal=35%   |
| SANA_TNFA_ENDOTOXILIAL_DN                | 80  | 0.41725332 | 1.5360807 | 0.02780339 | 0.03129177 | 1     | 4119 | tags=33%, list=10%, signal=40%  |
| O6BG_RESIST_MEDULLOBLASTOMA_UP           | 25  | 0.5847435  | 1.5360848 | 0.03106796 | 0.03124205 | 1     | 867  | tags=24%, list=3%, signal=25%   |
| GNATENKO_PLATELET                        | 42  | 0.5178522  | 1.5356041 | 0.01073345 | 0.0313408  | 1     | 5134 | tags=43%, list=20%, signal=54%  |
| TPOPATHWAY                               | 23  | 0.59210753 | 1.5350949 | 0.02359347 | 0.03145676 | 1     | 5118 | tags=48%, list=20%, signal=60%  |
| UBIQUITIN_MEDIATED_PROTEOLYSIS           | 24  | 0.5799012  | 1.534979  | 0.02747253 | 0.03145255 | 1     | 6322 | tags=50%, list=25%, signal=67%  |
| HS40523_NON_SMALL_CELL_LUNG_CANCER       | 54  | 0.50562045 | 1.5347166 | 0.0084856  | 0.03146788 | 1     | 4089 | tags=31%, list=16%, signal=47%  |
| GLUCONEOGENESIS                          | 53  | 0.51197106 | 1.5338306 | 0.00932836 | 0.03170811 | 1     | 3008 | tags=32%, list=12%, signal=36%  |
| VEGF_HUVEC_2HRS_UP                       | 30  | 0.5687288  | 1.5313785 | 0.01633394 | 0.03237901 | 1     | 2402 | tags=33%, list=10%, signal=37%  |
| O6BG_RESIST_MEDULLOBLASTOMA_DN           | 47  | 0.5196827  | 1.5311348 | 0.01234568 | 0.03239878 | 1     | 5934 | tags=55%, list=24%, signal=72%  |
| SHEPARD_BWIS MORPHOLINO_UP               | 164 | 0.43176004 | 1.5285718 | 0.0033008  | 0.03247718 | 1     | 5124 | tags=39%, list=15%, signal=48%  |
| BECKER_TAMOXIFEN_RESISTANT_DN            | 47  | 0.5176605  | 1.5280721 | 0.01757469 | 0.03320582 | 1     | 2894 | tags=32%, list=12%, signal=36%  |
| G13_SIGNALING_PATHWAY                    | 39  | 0.5333944  | 1.5276153 | 0.01258993 | 0.03329356 | 1     | 3825 | tags=38%, list=15%, signal=45%  |
| ZHAN_MMPK_EARLYS                         | 48  | 0.50724465 | 1.5270516 | 0.01202749 | 0.03380821 | 1     | 4897 | tags=40%, list=19%, signal=49%  |
| CALRES_MOUSE_UP                          | 29  | 0.56311154 | 1.5265309 | 0.0279329  | 0.03407194 | 1     | 4088 | tags=45%, list=20%, signal=56%  |
| BRCA2_BRCA1_UP                           | 49  | 0.5060846  | 1.5257863 | 0.012939   | 0.03363711 | 1     | 5128 | tags=45%, list=20%, signal=56%  |
| ARFPATHWAY                               | 16  | 0.6476581  | 1.5255086 | 0.02095238 | 0.03363431 | 1     | 4641 | tags=50%, list=18%, signal=61%  |
| FERRANDO_MLL_T_ALL_DN                    | 84  | 0.46273848 | 1.525351  | 0.00547445 | 0.03362433 | 1     | 5243 | tags=48%, list=21%, signal=60%  |
| STRESS_ARSENITE_SPECIFIC_DN              | 27  | 0.57935254 | 1.5211813 | 0.0248907  | 0.03483616 | 1     | 5129 | tags=56%, list=25%, signal=69%  |
| CALRES_RHESUS_UP                         | 66  | 0.48025054 | 1.5206757 | 0.00900901 | 0.03492704 | 1     | 3827 | tags=38%, list=15%, signal=45%  |
| HS405040_HUNTINGTONS_DISEASE             | 29  | 0.55113614 | 1.5206618 | 0.02798508 | 0.03487577 | 1     | 3739 | tags=38%, list=15%, signal=45%  |
| BRENTANI_TRANSPORT_OF_VESICLES           | 22  | 0.59387594 | 1.520413  | 0.03130755 | 0.03490246 | 1     | 3488 | tags=45%, list=14%, signal=53%  |
| FLECHNER_KIDNEY_TRANSPLANT_WELL_DN       | 21  | 0.610538   | 1.519276  | 0.01954948 | 0.03517222 | 1     | 3853 | tags=41%, list=16%, signal=47%  |
| RETT_UP                                  | 38  | 0.5367973  | 1.51884   | 0.01694915 | 0.03523544 | 1     | 5560 | tags=53%, list=22%, signal=67%  |
| G3CRPATHWAY                              | 35  | 0.5300477  | 1.5187061 | 0.02509653 | 0.03523022 | 1     | 6521 | tags=51%, list=26%, signal=69%  |
| CANCER_UNDIFFERENTIATED_MYELOMA          | 48  | 0.4766328  | 1.518006  | 0.0070922  | 0.03593166 | 1     | 4554 | tags=40%, list=18%, signal=48%  |
| MAGRANGAS_MULTIPLE_MYELOMA_IGL_VS_IGK_DN | 27  | 0.58337563 | 1.5179276 | 0.02594973 | 0.03593973 | 1     | 3275 | tags=41%, list=16%, signal=47%  |
| IDX_TSA_DN_CLUSTER2                      | 64  | 0.4895332  | 1.5174857 | 0.01029896 | 0.03543693 | 1     | 2586 | tags=36%, list=10%, signal=40%  |
| HS405020_PARKINSONS_DISEASE              | 15  | 0.6511597  | 1.516924  | 0.02504817 | 0.03553075 | 1     | 5316 | tags=53%, list=21%, signal=68%  |
| VERNELLS_PRB_CLSTR1                      | 63  | 0.48292428 | 1.5139052 | 0.008726   | 0.03638125 | 1     | 4247 | tags=27%, list=17%, signal=32%  |
| AMINOSUGARS_METABOLISM                   | 15  | 0.6446444  | 1.5115339 | 0.02726357 | 0.03706896 | 1     | 1220 | tags=23%, list=7%, signal=35%   |
| GAMMA_UV_FIBRO_UP                        | 35  | 0.53314614 | 1.5112958 | 0.03435805 | 0.03712008 | 1     | 3655 | tags=40%, list=15%, signal=47%  |
| TSA_HEPATOMA_UP                          | 35  | 0.5330766  | 1.5109535 | 0.02367942 | 0.03716667 | 1     | 3564 | tags=49%, list=14%, signal=57%  |
| DER_IFNG_UP                              | 63  | 0.48982704 | 1.5108355 | 0.01115242 | 0.03714857 | 1     | 3120 | tags=32%, list=12%, signal=36%  |
| YAGI_AKL_PROG_FAB                        | 179 | 0.41971686 | 1.5106468 | 0          | 0.03716436 | 1     | 3143 | tags=27%, list=13%, signal=31%  |
| HS404910_INSULIN_SIGNALING_PATHWAY       | 135 | 0.42817608 | 1.5105813 | 0.00853242 | 0.03713247 | 1     | 5069 | tags=42%, list=20%, signal=55%  |
| AGUIRRE_PANCREAS_CHR9                    | 22  | 0.5847973  | 1.5105611 | 0.03649635 | 0.03709715 | 1     | 6672 | tags=59%, list=27%, signal=80%  |
| AGED_RHESUS_DN                           | 108 | 0.44435105 | 1.5093546 | 0.00343053 | 0.03744079 | 1     | 4914 | tags=39%, list=20%, signal=48%  |
| ZHAN_TONSL_PCCB                          | 43  | 0.5196937  | 1.5077932 | 0.01645338 | 0.03785208 | 1     | 1421 | tags=26%, list=6%, signal=27%</ |

HSOA4920\_ADIPOCYTOKINE\_SIGNALING\_PATHWAY  
HSC\_EARLYPROGENITORS\_FETAL  
CELL\_CYCLE  
TOLLPATHWAY  
TSA\_CD4\_UP  
CANCERDRUGS\_PROBCELL\_UP  
CCR3PATHWAY

72 0.45232767 1.4699223 0.01073345 0.04827194 1  
420 0.37431073 1.4696546 0 0.04832366 1  
77 0.45127663 1.4690061 0.01041667 0.04850496 1  
34 0.524761 1.4690039 0.03315881 0.04843476 1  
28 0.53857774 1.4680119 0.05027933 0.04876502 1  
20 0.58069533 1.466416 0.0458891 0.04932635 1  
22 0.570208 1.4647925 0.06148282 0.04991756 1

4866 tags=40%, list=19%, signal=50%  
5143 tags=35%, list=20%, signal=44%  
6002 tags=39%, list=24%, signal=51%  
3784 tags=41%, list=15%, signal=48%  
2954 tags=43%, list=12%, signal=49%  
3195 tags=35%, list=13%, signal=40%  
6470 tags=59%, list=26%, signal=79%

Supplemental Table 3C. GSEA applying the c3 TFT gene sets.

| NAME                     | SIZE | ES         | NES        | NOM p-val  | FDR q-val  | FWER p-val | RANK AT MA | LEADING EDGE                   |
|--------------------------|------|------------|------------|------------|------------|------------|------------|--------------------------------|
| RGTIAMWNAIT_V\$HNF1_01   | 60   | -0.5123529 | -1.6453307 | 0          | 0.00882862 | 0.153      | 699        | tags=20%, list=3%, signal=21%  |
| V\$HNF1_01               | 196  | -0.3947922 | -1.5033293 | 0.00255754 | 0.02331588 | 0.574      | 2063       | tags=17%, list=8%, signal=18%  |
| V\$HNF1_Q6               | 214  | -0.3827675 | -1.4855314 | 0          | 0.01894972 | 0.641      | 2017       | tags=16%, list=8%, signal=18%  |
| V\$HNF1_C                | 193  | -0.3712104 | -1.4303702 | 0.00526316 | 0.02559373 | 0.848      | 1306       | tags=13%, list=5%, signal=14%  |
| GGCATITTC_V\$Y1_Q6       | 328  | 0.5942712  | 2.290567   | 0          | 0          | 0          | 5529       | tags=55%, list=22%, signal=69% |
| V\$BACH1_01              | 220  | 0.6033725  | 2.2612326  | 0          | 0          | 0          | 3196       | tags=33%, list=13%, signal=38% |
| GTGACGY_V\$E4F1_Q6       | 498  | 0.5696757  | 2.254964   | 0          | 0          | 0          | 4484       | tags=40%, list=18%, signal=48% |
| V\$E4F1_Q6               | 224  | 0.6000385  | 2.2321308  | 0          | 0          | 0          | 4484       | tags=42%, list=18%, signal=51% |
| V\$CREBP1CIJUN_01        | 212  | 0.5912382  | 2.2029307  | 0          | 0          | 0          | 4497       | tags=42%, list=18%, signal=51% |
| V\$Y1_Q6                 | 181  | 0.5969891  | 2.1893024  | 0          | 0          | 0          | 5353       | tags=54%, list=21%, signal=68% |
| V\$BACH2_01              | 234  | 0.587297   | 2.1872487  | 0          | 0          | 0          | 3196       | tags=33%, list=13%, signal=38% |
| V\$AP1_Q6                | 219  | 0.5893837  | 2.171019   | 0          | 0          | 0          | 3309       | tags=34%, list=13%, signal=39% |
| V\$CREB_Q2               | 208  | 0.580066   | 2.1580212  | 0          | 0          | 0          | 5284       | tags=46%, list=21%, signal=57% |
| V\$AP1_Q4                | 231  | 0.57855797 | 2.1452096  | 0          | 0          | 0          | 3309       | tags=33%, list=13%, signal=38% |
| V\$CREB_Q2               | 199  | 0.5804868  | 2.136413   | 0          | 0          | 0          | 5284       | tags=50%, list=21%, signal=63% |
| V\$CREB_Q1               | 210  | 0.5794024  | 2.1351106  | 0          | 0          | 0          | 5519       | tags=48%, list=22%, signal=61% |
| V\$SRF_Q5_01             | 196  | 0.5785723  | 2.127399   | 0          | 0          | 0          | 4789       | tags=43%, list=17%, signal=53% |
| V\$AP1F1_Q2              | 237  | 0.57590884 | 2.1230717  | 0          | 0          | 0          | 3309       | tags=33%, list=13%, signal=38% |
| GTGACGTC_V\$ATF3_Q6      | 187  | 0.5812837  | 2.1147983  | 0          | 0          | 0          | 4497       | tags=42%, list=18%, signal=50% |
| COT\$SACG_V\$PAX3_B      | 112  | 0.6125472  | 2.1100082  | 0          | 0          | 0          | 5714       | tags=54%, list=23%, signal=70% |
| V\$AP1_Q4_01             | 216  | 0.5635429  | 2.0992422  | 0          | 0          | 0          | 3162       | tags=30%, list=13%, signal=34% |
| V\$CREB_Q2_01            | 171  | 0.58120596 | 2.098078   | 0          | 0          | 0          | 5248       | tags=46%, list=21%, signal=58% |
| V\$AP1_Q2_01             | 235  | 0.5598912  | 2.0869715  | 0          | 0          | 0          | 3202       | tags=31%, list=12%, signal=35% |
| V\$SRF_C                 | 187  | 0.57098204 | 2.0851989  | 0          | 0          | 0          | 3722       | tags=39%, list=15%, signal=45% |
| V\$CREB_Q4               | 204  | 0.5614275  | 2.0822608  | 0          | 0          | 0          | 5284       | tags=44%, list=17%, signal=55% |
| V\$AP1_Q6_01             | 221  | 0.55951864 | 2.0698264  | 0          | 0          | 0          | 4147       | tags=37%, list=16%, signal=44% |
| V\$AP1_C                 | 239  | 0.55339086 | 2.068624   | 0          | 0          | 0          | 3207       | tags=30%, list=13%, signal=34% |
| V\$CREBP1_Q2             | 198  | 0.5668533  | 2.0682285  | 0          | 0          | 0          | 5519       | tags=45%, list=22%, signal=57% |
| V\$AP1_Q2                | 231  | 0.5579868  | 2.0680742  | 0          | 0          | 0          | 3365       | tags=31%, list=13%, signal=36% |
| V\$NRF2_01               | 191  | 0.5636902  | 2.046085   | 0          | 0          | 0          | 6110       | tags=61%, list=24%, signal=80% |
| V\$CREB_Q2_01            | 181  | 0.56607276 | 2.0443614  | 0          | 0          | 0          | 4464       | tags=39%, list=18%, signal=47% |
| KCCGNSWTTT_UNKNOWN       | 88   | 0.6146676  | 2.0394237  | 0          | 0          | 0          | 5547       | tags=61%, list=22%, signal=78% |
| V\$AR_Q2                 | 33   | 0.7195514  | 2.026539   | 0          | 0          | 0          | 5604       | tags=55%, list=22%, signal=70% |
| GCNMKCATNK_UNKNOWN       | 91   | 0.61896497 | 2.026152   | 0          | 0          | 0          | 5453       | tags=58%, list=22%, signal=74% |
| V\$ATF4_Q2               | 200  | 0.55270433 | 2.017518   | 0          | 0          | 0          | 5620       | tags=44%, list=22%, signal=56% |
| V\$ATF3_Q6               | 203  | 0.54582006 | 2.0100446  | 0          | 0          | 0          | 4084       | tags=37%, list=16%, signal=44% |
| TGASTMAGC_V\$NF2E_Q1     | 168  | 0.55788183 | 2.0097554  | 0          | 0          | 0          | 3155       | tags=30%, list=13%, signal=34% |
| V\$ATF_Q1                | 216  | 0.5470428  | 2.0091538  | 0          | 0          | 0          | 4084       | tags=35%, list=17%, signal=42% |
| V\$FXR_IR1_Q6            | 91   | 0.60076696 | 2.0087833  | 0          | 0          | 0          | 4565       | tags=38%, list=18%, signal=47% |
| V\$ATF6_01               | 97   | 0.6025183  | 2.0047493  | 0          | 0          | 0          | 3144       | tags=36%, list=12%, signal=41% |
| V\$NFMUE1_Q6             | 193  | 0.54704887 | 1.9993665  | 0          | 0          | 0          | 5446       | tags=52%, list=22%, signal=66% |
| V\$AP1_01                | 222  | 0.5385724  | 1.998229   | 0          | 0          | 0          | 3162       | tags=29%, list=13%, signal=44% |
| V\$CEBPB_Q2              | 212  | 0.54038805 | 1.9951693  | 0          | 0          | 0          | 4961       | tags=42%, list=20%, signal=51% |
| TMTCCGGANR_UNKNOWN       | 109  | 0.587319   | 1.9888239  | 0          | 0          | 0          | 4985       | tags=50%, list=20%, signal=63% |
| V\$ATF1_Q6               | 192  | 0.5395014  | 1.9753034  | 0          | 0          | 0          | 4021       | tags=34%, list=16%, signal=40% |
| V\$Y1_Q2                 | 186  | 0.5452206  | 1.9710062  | 0          | 0          | 0          | 5193       | tags=50%, list=21%, signal=64% |
| TCCCRNRTGC_UNKNOWN       | 144  | 0.558287   | 1.9684423  | 0          | 0          | 0          | 6022       | tags=49%, list=24%, signal=64% |
| V\$PAX3_B                | 73   | 0.60719323 | 1.9550816  | 0          | 0          | 0          | 3646       | tags=38%, list=14%, signal=45% |
| GGGNANTTCC_UNKNOWN       | 98   | 0.582975   | 1.9534918  | 0          | 0          | 0          | 5679       | tags=54%, list=23%, signal=70% |
| V\$E4BP4_01              | 175  | 0.54051155 | 1.9509376  | 0          | 0          | 0          | 4338       | tags=34%, list=17%, signal=40% |
| V\$SRF_01                | 48   | 0.65185314 | 1.9480112  | 0          | 0          | 0          | 4050       | tags=48%, list=16%, signal=57% |
| V\$HSF2_01               | 195  | 0.52965844 | 1.9433587  | 0          | 3.20E-05   | 0.001      | 4895       | tags=38%, list=19%, signal=47% |
| V\$E2F1_Q6_01            | 193  | 0.5329531  | 1.942727   | 0          | 3.14E-05   | 0.001      | 3671       | tags=30%, list=15%, signal=34% |
| V\$E2F1_Q6               | 192  | 0.53691244 | 1.9402326  | 0          | 3.08E-05   | 0.001      | 6002       | tags=45%, list=24%, signal=58% |
| V\$ATF_B                 | 156  | 0.5488     | 1.9399536  | 0          | 3.02E-05   | 0.001      | 4433       | tags=38%, list=18%, signal=46% |
| V\$WHN_B                 | 201  | 0.52276105 | 1.9284623  | 0          | 6.24E-05   | 0.002      | 5604       | tags=40%, list=22%, signal=51% |
| V\$SRF_Q6                | 196  | 0.52531165 | 1.9238102  | 0          | 6.12E-05   | 0.002      | 3722       | tags=34%, list=15%, signal=39% |
| V\$SRF_Q6                | 214  | 0.51795614 | 1.9179518  | 0          | 6.12E-05   | 0.003      | 4427       | tags=36%, list=16%, signal=42% |
| V\$CREB_Q3               | 202  | 0.5201336  | 1.9161655  | 0          | 8.79E-05   | 0.003      | 4900       | tags=40%, list=19%, signal=49% |
| V\$HIF1_Q5               | 192  | 0.5230604  | 1.9150733  | 0          | 8.63E-05   | 0.003      | 4748       | tags=38%, list=19%, signal=47% |
| V\$E2F1_Q4_01            | 187  | 0.5269587  | 1.9129777  | 0          | 8.48E-05   | 0.003      | 5736       | tags=40%, list=23%, signal=52% |
| TTGCWCAR_V\$CEBPB_Q2     | 52   | 0.6298663  | 1.9079359  | 0          | 8.34E-05   | 0.003      | 3703       | tags=44%, list=15%, signal=52% |
| V\$NFKAPPAB_01           | 212  | 0.5172676  | 1.9035771  | 0          | 1.08E-04   | 0.004      | 4466       | tags=37%, list=18%, signal=44% |
| V\$E2F_Q3_01             | 192  | 0.5242049  | 1.9018143  | 0          | 1.07E-04   | 0.004      | 5736       | tags=40%, list=23%, signal=52% |
| V\$STAT1_Q2              | 195  | 0.51544815 | 1.9013222  | 0          | 1.05E-04   | 0.004      | 5507       | tags=45%, list=22%, signal=57% |
| ATCMNTCCGY_UNKNOWN       | 41   | 0.6552566  | 1.8943037  | 0          | 1.03E-04   | 0.004      | 4570       | tags=54%, list=18%, signal=65% |
| V\$MYCMA5_B              | 218  | 0.5103272  | 1.8892235  | 0          | 1.28E-04   | 0.005      | 4570       | tags=37%, list=18%, signal=44% |
| V\$E2F_Q1                | 58   | 0.6082621  | 1.8889593  | 0          | 1.26E-04   | 0.005      | 6046       | tags=55%, list=24%, signal=72% |
| V\$MAZ_Q6                | 146  | 0.5332769  | 1.876554   | 0          | 1.49E-04   | 0.006      | 5467       | tags=42%, list=22%, signal=54% |
| V\$ELK1_Q2               | 182  | 0.5175156  | 1.8746837  | 0          | 1.46E-04   | 0.006      | 6213       | tags=60%, list=25%, signal=80% |
| V\$HTF_Q1                | 55   | 0.6203799  | 1.8740788  | 0          | 1.68E-04   | 0.007      | 1885       | tags=33%, list=14%, signal=39% |
| V\$TFII_Q6               | 171  | 0.52374285 | 1.873763   | 0          | 1.65E-04   | 0.007      | 4505       | tags=36%, list=18%, signal=43% |
| V\$MAZR_Q1               | 183  | 0.5114655  | 1.8720949  | 0          | 1.86E-04   | 0.008      | 5489       | tags=44%, list=22%, signal=56% |
| TCATTWK_UNKNOWN          | 192  | 0.51396286 | 1.8720549  | 0          | 1.84E-04   | 0.008      | 4910       | tags=40%, list=20%, signal=49% |
| TTATRTAA_V\$E4BP4_01     | 207  | 0.50914631 | 1.8717595  | 0          | 1.81E-04   | 0.008      | 4161       | tags=35%, list=19%, signal=45% |
| V\$CEBP_C                | 165  | 0.514555   | 1.8705193  | 0          | 1.79E-04   | 0.008      | 5209       | tags=38%, list=21%, signal=47% |
| V\$E2F_Q4                | 188  | 0.5105552  | 1.8689679  | 0          | 1.76E-04   | 0.008      | 5736       | tags=39%, list=23%, signal=51% |
| V\$SP1_01                | 194  | 0.51106423 | 1.8682902  | 0          | 1.74E-04   | 0.008      | 5336       | tags=41%, list=21%, signal=52% |
| V\$GAPB_B                | 182  | 0.5167688  | 1.864873   | 0          | 1.71E-04   | 0.008      | 5465       | tags=50%, list=22%, signal=63% |
| V\$AP2_Q6                | 203  | 0.5076914  | 1.8622507  | 0          | 1.69E-04   | 0.008      | 4758       | tags=38%, list=19%, signal=47% |
| KGCCGNNNNNTTGAYG_UNKNOWN | 45   | 0.62706494 | 1.8590322  | 0          | 1.67E-04   | 0.008      | 4171       | tags=53%, list=17%, signal=64% |
| V\$HIF1_Q3               | 183  | 0.5135309  | 1.8577324  | 0          | 1.65E-04   | 0.008      | 3361       | tags=33%, list=13%, signal=38% |
| GCANNCGAANY_UNKNOWN      | 86   | 0.56315625 | 1.8503048  | 0          | 1.61E-04   | 0.008      | 6199       | tags=41%, list=17%, signal=78% |
| V\$E2F1DP2_01            | 189  | 0.50749    | 1.8550315  | 0          | 1.61E-04   | 0.008      | 5755       | tags=40%, list=23%, signal=52% |
| V\$E2F_Q4_01             | 192  | 0.5121753  | 1.8546622  | 0          | 1.59E-04   | 0.008      | 5736       | tags=41%, list=23%, signal=52% |
| RGAAANTTC_V\$HSF1_01     | 351  | 0.48139387 | 1.8530291  | 0          | 1.76E-04   | 0.009      | 4895       | tags=36%, list=19%, signal=44% |
| V\$USF_Q6_01             | 189  | 0.5126237  | 1.8490425  | 0          | 1.93E-04   | 0.01       | 4699       | tags=41%, list=17%, signal=50% |
| V\$YAAANRNNNGCG_UNKNOWN  | 47   | 0.6193501  | 1.848892   | 0          | 1.91E-04   | 0.01       | 2915       | tags=38%, list=12%, signal=43% |
| GGGNRMNNYGC_UNKNOWN      | 65   | 0.58417284 | 1.846254   | 0          | 1.89E-04   | 0.01       | 2891       | tags=38%, list=11%, signal=43% |
| V\$HSF_Q5                | 151  | 0.51976216 | 1.8447096  | 0          | 1.86E-04   | 0.01       | 4090       | tags=33%, list=16%, signal=39% |
| V\$E2F1DP1RB_01          | 186  | 0.5029712  | 1.8444108  | 0          | 1.84E-04   | 0.01       | 5736       | tags=39%, list=23%, signal=50% |
| TGAYRTCA_V\$ATF3_Q6      | 41   | 0.47029677 | 1.8441186  | 0          | 1.82E-04   | 0.01       | 4535       | tags=32%, list=18%, signal=38% |
| V\$E2F4DP2_01            | 189  | 0.50749    | 1.8409696  | 0          | 1.98E-04   | 0.011      | 5755       | tags=40%, list=23%, signal=52% |
| V\$NFKB_Q6               | 212  | 0.4935854  | 1.8365207  | 0          | 1.96E-04   | 0.011      | 4480       | tags=36%, list=18%, signal=44% |
| TTCYRGAA_UNKNOWN         | 241  | 0.49137568 | 1.8325168  | 0          | 1.94E-04   | 0.011      | 5002       | tags=39%, list=20%, signal=48% |
| V\$E2F_Q6                | 186  | 0.49912423 | 1.8320893  | 0          | 1.91E-04   | 0.011      | 5736       | tags=37%, list=17%, signal=48% |
| V\$E2F1DP1_01            | 189  | 0.50749    | 1.8318052  | 0          | 1.89E-04   | 0.011      | 5755       | tags=40%, list=23%, signal=52% |
| V\$Y1_Q1                 | 205  | 0.49771935 | 1.830329   | 0          | 2.03E-04   | 0.012      | 4717       | tags=40%, list=19%, signal=48% |
| V\$PAX4_Q1               | 175  | 0.50707585 | 1.8259888  | 0          | 2.36E-04   | 0.014      | 5050       | tags=35%, list=20%, signal=43% |
| CCGMNNTNACG_UNKNOWN      | 61   | 0.5863429  | 1.825174   | 0          | 2.33E-04   | 0.014      | 5620       | tags=62%, list=22%, signal=80% |
| AAGWWRNNGGCG_UNKNOWN     | 91   | 0.5499313  | 1.8251439  | 0          | 2.31E-04   | 0.014      | 5567       | tags=56%, list=22%, signal=72% |
| V\$CHOP_01               | 195  | 0.49513888 | 1.8229665  | 0          | 2.62E-04   | 0.016      | 3618       |                                |

|                          |     |            |           |            |            |       |      |                                |
|--------------------------|-----|------------|-----------|------------|------------|-------|------|--------------------------------|
| VSCETS1P54_01            | 198 | 0.4755724  | 1.7451237 | 0          | 5.03E-04   | 0.042 | 5219 | tags=44%, list=21%, signal=55% |
| VSOC1_05                 | 207 | 0.7465539  | 1.7450839 | 0          | 4.99E-04   | 0.042 | 4732 | tags=29%, list=19%, signal=35% |
| SCGSSAAA_V\$EFD1DP2_01   | 135 | 0.5002014  | 1.7424008 | 0          | 5.07E-04   | 0.043 | 6002 | tags=42%, list=19%, signal=45% |
| SMTTTTGT_UNKNOWN         | 335 | 0.450915   | 1.7420851 | 0          | 5.04E-04   | 0.043 | 3694 | tags=28%, list=15%, signal=33% |
| VSICREL_01               | 216 | 0.47413778 | 1.7414826 | 0          | 5.11E-04   | 0.044 | 4788 | tags=38%, list=19%, signal=46% |
| VSNFY_Q6_01              | 211 | 0.47765926 | 1.7406372 | 0          | 5.08E-04   | 0.044 | 4414 | tags=35%, list=18%, signal=42% |
| VSTCT11MAFC_01           | 171 | 0.48608774 | 1.7400863 | 0          | 5.04E-04   | 0.044 | 4553 | tags=33%, list=18%, signal=40% |
| V\$REB6_Q6               | 211 | 0.46659163 | 1.7378987 | 0          | 5.34E-04   | 0.047 | 4329 | tags=28%, list=17%, signal=33% |
| WGTTNNNNNA_A_UNKNOWN     | 449 | 0.44225937 | 1.7321546 | 0          | 5.84E-04   | 0.052 | 5044 | tags=33%, list=20%, signal=40% |
| V\$CEBP_Q2_01            | 219 | 0.46616068 | 1.7316371 | 0          | 5.80E-04   | 0.052 | 4058 | tags=31%, list=16%, signal=36% |
| ACAWNNNSRCGG_UNKNOWN     | 53  | 0.5651108  | 1.7299749 | 0          | 5.88E-04   | 0.053 | 5807 | tags=64%, list=23%, signal=83% |
| V\$SIAD_Q6               | 206 | 0.4714284  | 1.7298371 | 0          | 5.84E-04   | 0.053 | 5465 | tags=35%, list=17%, signal=45% |
| CTNTMAGA_UNKNOWN         | 101 | 0.50661385 | 1.7286557 | 0          | 6.11E-04   | 0.056 | 6232 | tags=49%, list=25%, signal=64% |
| V\$CEBP_Q3               | 204 | 0.46687302 | 1.7280988 | 0          | 6.18E-04   | 0.057 | 4931 | tags=37%, list=20%, signal=45% |
| V\$ZFS_01                | 189 | 0.4728711  | 1.7273991 | 0          | 6.14E-04   | 0.057 | 3672 | tags=29%, list=19%, signal=33% |
| V\$REBP1_Q6              | 206 | 0.46697426 | 1.727361  | 0          | 6.10E-04   | 0.057 | 4227 | tags=32%, list=17%, signal=38% |
| V\$ARNT_Q2               | 197 | 0.47261047 | 1.7262137 | 0          | 6.06E-04   | 0.057 | 4852 | tags=39%, list=19%, signal=48% |
| V\$PAX4_01               | 214 | 0.46513355 | 1.721596  | 0          | 6.33E-04   | 0.06  | 4720 | tags=37%, list=19%, signal=45% |
| WCTCNATGGY_UNKNOWN       | 60  | 0.5480697  | 1.7198224 | 0          | 6.39E-04   | 0.061 | 4416 | tags=48%, list=18%, signal=58% |
| V\$IRAT_Q6               | 193 | 0.47256094 | 1.718066  | 0          | 6.56E-04   | 0.063 | 5402 | tags=37%, list=21%, signal=46% |
| AAANWWTGC_UNKNOWN        | 168 | 0.47432628 | 1.7146043 | 0          | 6.72E-04   | 0.065 | 4063 | tags=29%, list=16%, signal=34% |
| GCTNWTTCG_UNKNOWN        | 247 | 0.45930308 | 1.7141201 | 0          | 6.78E-04   | 0.066 | 5392 | tags=36%, list=21%, signal=45% |
| V\$MAX_01                | 209 | 0.46714696 | 1.7120004 | 0          | 6.84E-04   | 0.067 | 4669 | tags=35%, list=19%, signal=43% |
| GTCNYATGR_UNKNOWN        | 83  | 0.51856285 | 1.7116836 | 0          | 6.79E-04   | 0.067 | 5402 | tags=45%, list=21%, signal=57% |
| V\$EZF_Q6_01             | 190 | 0.46781695 | 1.7059667 | 0          | 7.55E-04   | 0.075 | 5736 | tags=37%, list=23%, signal=47% |
| V\$HSF1_01               | 212 | 0.46763918 | 1.7049329 | 0          | 7.51E-04   | 0.075 | 4895 | tags=33%, list=19%, signal=41% |
| V\$T3R_Q6                | 210 | 0.46040332 | 1.7031096 | 0          | 7.67E-04   | 0.076 | 4594 | tags=30%, list=18%, signal=36% |
| V\$APREP_01              | 144 | 0.4823102  | 1.70308   | 0          | 7.62E-04   | 0.076 | 3679 | tags=31%, list=18%, signal=37% |
| V\$STATS4_Q6             | 160 | 0.4737022  | 1.7007922 | 0          | 7.86E-04   | 0.078 | 5496 | tags=36%, list=22%, signal=45% |
| V\$TEF_Q6                | 205 | 0.4597248  | 1.7006199 | 0          | 7.81E-04   | 0.078 | 3876 | tags=28%, list=15%, signal=33% |
| TTCNRGNNTTCT_V\$HSF_Q6   | 119 | 0.49224594 | 1.7004067 | 0          | 7.77E-04   | 0.078 | 5171 | tags=45%, list=21%, signal=56% |
| V\$XBP1_01               | 112 | 0.49945384 | 1.6979194 | 0          | 8.01E-04   | 0.081 | 3485 | tags=34%, list=19%, signal=40% |
| V\$EZF1_Q3_01            | 201 | 0.46258405 | 1.6968845 | 0          | 7.96E-04   | 0.081 | 3833 | tags=30%, list=15%, signal=36% |
| TAAWWATAG_V\$SRFC4_Q2    | 137 | 0.48079428 | 1.6966588 | 0          | 7.92E-04   | 0.081 | 4827 | tags=33%, list=19%, signal=40% |
| V\$BPX1_Q2               | 110 | 0.4953985  | 1.693778  | 0          | 8.43E-04   | 0.087 | 5131 | tags=32%, list=20%, signal=40% |
| V\$USF2_Q6               | 198 | 0.46394134 | 1.6923735 | 0          | 8.76E-04   | 0.091 | 4699 | tags=37%, list=19%, signal=46% |
| V\$AR_Q6                 | 53  | 0.55583024 | 1.6917329 | 0          | 8.71E-04   | 0.091 | 4205 | tags=36%, list=17%, signal=43% |
| V\$TST1_01               | 215 | 0.4616795  | 1.6909156 | 0          | 8.66E-04   | 0.091 | 4113 | tags=29%, list=16%, signal=34% |
| V\$TEF1_Q6               | 177 | 0.46887946 | 1.6897116 | 0.00160772 | 8.80E-04   | 0.093 | 3668 | tags=27%, list=15%, signal=31% |
| V\$MYC_Q2                | 147 | 0.48024545 | 1.6883767 | 0          | 8.94E-04   | 0.094 | 5124 | tags=42%, list=20%, signal=53% |
| V\$REB6_Q1               | 217 | 0.4544079  | 1.6840476 | 0          | 9.43E-04   | 0.099 | 4394 | tags=29%, list=17%, signal=35% |
| V\$GR_01                 | 164 | 0.4659245  | 1.6838434 | 0          | 9.56E-04   | 0.101 | 5562 | tags=39%, list=22%, signal=50% |
| V\$FREAC7_Q1             | 158 | 0.4757018  | 1.6835059 | 0          | 9.50E-04   | 0.101 | 5465 | tags=38%, list=22%, signal=48% |
| V\$NGR1C_01              | 195 | 0.46007645 | 1.6774192 | 0          | 0.00106029 | 0.113 | 4090 | tags=31%, list=19%, signal=36% |
| CTAWWWATA_V\$SRFC4_Q2    | 303 | 0.44222742 | 1.6768737 | 0          | 0.0015443  | 0.117 | 4685 | tags=25%, list=14%, signal=30% |
| V\$TCF1P_Q6              | 194 | 0.45648012 | 1.6760206 | 0          | 0.00107475 | 0.116 | 5740 | tags=41%, list=23%, signal=52% |
| V\$SRFC4_Q2              | 184 | 0.46206728 | 1.6754515 | 0          | 0.00106888 | 0.116 | 5290 | tags=29%, list=21%, signal=36% |
| V\$IK1_01                | 215 | 0.45386162 | 1.6751808 | 0          | 0.0010721  | 0.117 | 4240 | tags=31%, list=17%, signal=37% |
| V\$ZFS_B                 | 197 | 0.4584609  | 1.6677737 | 0          | 0.00114517 | 0.124 | 4436 | tags=26%, list=16%, signal=32% |
| V\$SR_Y_Q2               | 201 | 0.45702133 | 1.6675481 | 0          | 0.00114779 | 0.125 | 3671 | tags=25%, list=15%, signal=30% |
| V\$STAT3_Q2              | 119 | 0.48620528 | 1.6654506 | 0          | 0.00115769 | 0.127 | 2948 | tags=26%, list=12%, signal=29% |
| V\$PAX5_Q1               | 123 | 0.48005432 | 1.6650977 | 0          | 0.00117711 | 0.13  | 2590 | tags=24%, list=10%, signal=27% |
| YTCATCAWW_UNKNOWN        | 155 | 0.4706429  | 1.6627203 | 0          | 0.00112273 | 0.137 | 4235 | tags=30%, list=17%, signal=38% |
| V\$CACCCBINDINGFACTOR_Q6 | 220 | 0.4480023  | 1.6618226 | 0          | 0.0012413  | 0.138 | 3691 | tags=27%, list=15%, signal=31% |
| V\$ZIC2_01               | 203 | 0.45504257 | 1.6614687 | 0          | 0.0012348  | 0.138 | 3671 | tags=26%, list=15%, signal=30% |
| V\$PR_01                 | 118 | 0.4811773  | 1.6612622 | 0          | 0.0012837  | 0.139 | 5682 | tags=33%, list=23%, signal=42% |
| V\$PR_Q2                 | 212 | 0.45279582 | 1.6608166 | 0          | 0.0012947  | 0.139 | 3900 | tags=29%, list=16%, signal=36% |
| V\$CMYB_Q1               | 191 | 0.45374638 | 1.6599582 | 0          | 0.00125652 | 0.141 | 5402 | tags=41%, list=21%, signal=52% |
| V\$SPZ1_01               | 199 | 0.45549163 | 1.6592832 | 0          | 0.00125788 | 0.142 | 4448 | tags=35%, list=18%, signal=36% |
| V\$USF_C                 | 229 | 0.4450091  | 1.6585641 | 0          | 0.00125147 | 0.142 | 4699 | tags=35%, list=19%, signal=43% |
| V\$HFH4_01               | 167 | 0.46231526 | 1.657958  | 0          | 0.00127856 | 0.148 | 4816 | tags=28%, list=19%, signal=36% |
| V\$REBP1_Q2              | 75  | 0.5076376  | 1.6570964 | 0          | 0.00128011 | 0.147 | 3282 | tags=27%, list=13%, signal=31% |
| V\$ETF_Q6                | 85  | 0.49651808 | 1.6559469 | 0          | 0.00128137 | 0.148 | 5905 | tags=48%, list=23%, signal=63% |
| V\$POU3F2_01             | 85  | 0.5058726  | 1.6556565 | 0          | 0.00127496 | 0.148 | 3365 | tags=25%, list=13%, signal=28% |
| V\$AHRAANT_01            | 15  | 0.48232395 | 1.6552697 | 0          | 0.00126862 | 0.148 | 4895 | tags=36%, list=19%, signal=46% |
| V\$FOXO1_Q2              | 192 | 0.45697334 | 1.652134  | 0          | 0.00128662 | 0.151 | 4717 | tags=26%, list=19%, signal=40% |
| V\$SP1_Q4_01             | 198 | 0.44959164 | 1.6519011 | 0          | 0.00128826 | 0.152 | 5200 | tags=36%, list=21%, signal=45% |
| V\$SP1_Q6                | 195 | 0.4531975  | 1.6507376 | 0          | 0.00131237 | 0.156 | 4642 | tags=35%, list=18%, signal=42% |
| V\$USF_Q2                | 160 | 0.45026472 | 1.6494068 | 0          | 0.00132132 | 0.157 | 4428 | tags=25%, list=16%, signal=38% |
| V\$OC1_01                | 213 | 0.44284758 | 1.647346  | 0          | 0.00135318 | 0.162 | 4674 | tags=28%, list=19%, signal=34% |
| V\$LEF1_Q6               | 219 | 0.44470325 | 1.6461449 | 0          | 0.0013696  | 0.165 | 2767 | tags=20%, list=11%, signal=22% |
| V\$CACBINDINGPROTEIN_Q6  | 196 | 0.45132855 | 1.645847  | 0          | 0.00137799 | 0.166 | 3671 | tags=30%, list=15%, signal=35% |
| GGANTNNNNITCCY_UNKNOWN   | 90  | 0.49433017 | 1.6453785 | 0.00178253 | 0.00139426 | 0.168 | 4722 | tags=44%, list=19%, signal=55% |
| V\$MYCMAX_Q3             | 206 | 0.44768456 | 1.642457  | 0          | 0.00105436 | 0.177 | 4789 | tags=37%, list=20%, signal=46% |
| V\$REB6_Q3               | 194 | 0.45145378 | 1.6386571 | 0          | 0.00153308 | 0.183 | 3883 | tags=24%, list=15%, signal=28% |
| V\$DR4_Q2                | 205 | 0.44454336 | 1.6370566 | 0          | 0.00154118 | 0.185 | 4407 | tags=32%, list=18%, signal=38% |
| ATGCVGGA_UNKNOWN         | 77  | 0.5031793  | 1.6368246 | 0          | 0.00153394 | 0.185 | 5824 | tags=55%, list=23%, signal=71% |
| WTGAAAT_UNKNOWN          | 492 | 0.41197217 | 1.6327    | 0          | 0.00163137 | 0.193 | 5118 | tags=30%, list=17%, signal=35% |
| V\$STAT6_Q1              | 206 | 0.4447451  | 1.6301475 | 0.00160772 | 0.00166905 | 0.201 | 3094 | tags=26%, list=12%, signal=30% |
| V\$SETS1_B               | 203 | 0.44236588 | 1.6259817 | 0          | 0.00177907 | 0.215 | 3040 | tags=27%, list=12%, signal=30% |
| V\$IRF7_Q1               | 211 | 0.4384015  | 1.6256049 | 0          | 0.00177806 | 0.216 | 3191 | tags=22%, list=10%, signal=25% |
| V\$APA_Q5                | 215 | 0.44249344 | 1.6248983 | 0          | 0.00180773 | 0.218 | 4451 | tags=27%, list=16%, signal=36% |
| V\$CEBPB_GAMMA_Q6        | 209 | 0.4439958  | 1.6235765 | 0          | 0.00184403 | 0.223 | 5722 | tags=41%, list=23%, signal=52% |
| V\$FREAC2_Q1             | 214 | 0.4376504  | 1.6213793 | 0          | 0.0018945  | 0.23  | 5257 | tags=31%, list=21%, signal=39% |
| V\$VDR_Q3                | 186 | 0.4447468  | 1.6205156 | 0          | 0.00190742 | 0.233 | 5456 | tags=34%, list=22%, signal=44% |
| V\$MYCMAX_Q2             | 108 | 0.43883517 | 1.6199827 | 0          | 0.00192088 | 0.236 | 4601 | tags=24%, list=12%, signal=27% |
| ACTAYRNNCCCR_UNKNOWN     | 324 | 0.4197102  | 1.6170073 | 0          | 0.00194877 | 0.241 | 6121 | tags=44%, list=24%, signal=57% |
| GAANYNYGACNY_UNKNOWN     | 59  | 0.52644432 | 1.6169757 | 0.00361011 | 0.00194007 | 0.241 | 4185 | tags=41%, list=17%, signal=49% |
| V\$SP3_Q3                | 193 | 0.4415886  | 1.6155157 | 0          | 0.00198037 | 0.245 | 5123 | tags=32%, list=20%, signal=40% |
| V\$GCF_Q1                | 61  | 0.51890882 | 1.6146237 | 0.0016785  | 0.00198082 | 0.245 | 2900 | tags=23%, list=12%, signal=26% |
| V\$TITF1_Q3              | 191 | 0.4436619  | 1.6143755 | 0          | 0.00199808 | 0.249 | 4853 | tags=34%, list=19%, signal=42% |
| V\$POU3F2_Q2             | 211 | 0.43577394 | 1.6118054 | 0          | 0.00208783 | 0.259 | 4533 | tags=28%, list=16%, signal=34% |
| V\$ZID_01                | 182 | 0.46489396 | 1.6113809 | 0          | 0.00211438 | 0.264 | 3812 | tags=29%, list=15%, signal=33% |
| V\$HEIS1BHX9A_01         | 115 | 0.4622922  | 1.610397  | 0          | 0.0021429  | 0.269 | 3723 | tags=24%, list=12%, signal=27% |
| GGCNRNWCITCY_UNKNOWN     | 62  | 0.523537   | 1.6038619 | 0.00358423 | 0.00229005 | 0.29  | 5589 | tags=53%, list=22%, signal=68% |
| V\$TFIIA_Q6              | 214 | 0.43666732 | 1.6028023 | 0          | 0.00232802 | 0.294 | 4714 | tags=33%, list=19%, signal=40% |
| V\$SRFC4_01              | 211 | 0.43613017 | 1.599262  | 0          | 0.00247381 | 0.311 | 4687 | tags=35%, list=19%, signal=42% |
| V\$SRFC4_Q2              | 210 | 0.43165374 | 1.599267  | 0          | 0.00259303 | 0.326 | 3282 | tags=24%, list=16%, signal=30% |
| V\$IFP1_Q4               | 203 | 0.43455395 | 1.5947862 | 0          | 0.00262224 | 0.329 | 4050 | tags=29%, list=16%, signal=34% |
| V\$MZF1_Q2               | 192 | 0.43589994 | 1.593626  | 0          | 0.00263744 | 0.333 | 5306 | tags=39%, list=21%, signal=49% |
| V\$PC2_01                | 209 | 0.43249202 | 1.5912454 | 0          | 0.00270722 | 0.339 | 4649 | tags=33%, list=19%, signal=41% |
| CCCNNNNNNAAGWT_UNKNOWN   | 79  | 0.49543133 | 1.5906682 | 0.00168067 | 0.00270963 | 0.341 | 6289 | tags=48%, list=25%, signal=64% |
| V\$NF2_01                | 223 | 0.4321129  | 1.5897207 | 0          | 0.0026993  | 0.341 | 3207 | tags=26%, list=12%, signal=26% |
| V\$GCM_Q2                | 191 | 0.43605715 | 1.5892298 | 0          | 0.00270686 | 0.343 | 4765 | tags=30%, list=19%, signal=37% |
| V\$STAT1_Q3              | 198 | 0.4327644  | 1.5873227 | 0.00162075 | 0.00276871 | 0.351 | 4205 | tags=29%, list=17%, signal=35% |
| TCANNTGAY_V\$REBP1_01    | 378 | 0.4086896  | 1.5870233 | 0          | 0.00277083 | 0.352 | 4762 | tags=35%, list=19%, signal=43% |
| V\$GR1_01                | 198 | 0.43723387 | 1.5865226 | 0          | 0.00277723 | 0.354 | 4230 | tags=30%, list=17%, signal=36% |
| V\$AHR_Q5                | 168 | 0.43573183 | 1.5860454 | 0          | 0.00276799 | 0.354 | 6114 | tags=42%, list=24%, signal=60% |
| V\$HGX13_01              | 33  | 0.57651097 | 1.5855402 | 0.0093633  | 0.00278939 | 0.358 | 3694 | tags=36%, list=15%, signal=43% |
| SNACANNVSYAGA_UNKNOWN    | 58  | 0.5132772  | 1.5835614 | 0.00683761 | 0.00285555 | 0.365 | 4658 | tags=40%, list=19%, signal=49% |
| V\$ATA_C                 | 246 | 0.42031404 | 1.5811874 | 0          | 0.0029424  |       |      |                                |

|                           |     |            |           |            |            |       |      |                                |
|---------------------------|-----|------------|-----------|------------|------------|-------|------|--------------------------------|
| VSNK62_Q2                 | 199 | 0.42294714 | 1.5485935 | 0.00159744 | 0.00386437 | 0.509 | 4894 | tags=33%, list=19%, signal=41% |
| VSEGR3_Q1                 | 61  | 0.49937695 | 1.5476586 | 0.00719425 | 0.00390614 | 0.516 | 4230 | tags=36%, list=17%, signal=43% |
| VSP300_Q1                 | 192 | 0.42549089 | 1.5470964 | 0.00000000 | 0.00000000 | 0.513 | 5963 | tags=40%, list=24%, signal=35% |
| GTGGGTGK_UNKNOWN          | 235 | 0.41550505 | 1.5454593 | 0          | 0.00401152 | 0.528 | 3771 | tags=22%, list=15%, signal=26% |
| V5STATS_Q2                | 115 | 0.45556486 | 1.5442215 | 0.00327869 | 0.00404129 | 0.534 | 3950 | tags=30%, list=16%, signal=36% |
| V5PAX2_Q2                 | 205 | 0.4192184  | 1.543143  | 0          | 0.00407626 | 0.542 | 4789 | tags=29%, list=19%, signal=35% |
| V5S0X5_Q1                 | 212 | 0.4192117  | 1.5425231 | 0          | 0.00409613 | 0.545 | 2407 | tags=17%, list=10%, signal=31% |
| YTAAYNGCT_UNKNOWN         | 122 | 0.4443257  | 1.5405115 | 0          | 0.00416889 | 0.554 | 3797 | tags=25%, list=15%, signal=30% |
| V5OCT_C                   | 219 | 0.4145554  | 1.5357249 | 0.0015748  | 0.00443313 | 0.573 | 4533 | tags=26%, list=18%, signal=32% |
| V5OCT1_Q3                 | 183 | 0.42132202 | 1.5353551 | 0.0015949  | 0.00442879 | 0.574 | 5116 | tags=32%, list=20%, signal=39% |
| V5MYOGENIN_Q6             | 195 | 0.4236658  | 1.534865  | 0.00160772 | 0.00445665 | 0.576 | 3967 | tags=27%, list=16%, signal=31% |
| V5ER_Q6_Q2                | 215 | 0.4127034  | 1.5304961 | 0          | 0.00464879 | 0.596 | 4335 | tags=30%, list=19%, signal=36% |
| TGANNYRGCA_V5TCF11MAFG_Q1 | 243 | 0.40982375 | 1.5297115 | 0          | 0.00468645 | 0.6   | 3526 | tags=25%, list=14%, signal=29% |
| V5FOXO1_Q1                | 204 | 0.4180894  | 1.527244  | 0          | 0.00480921 | 0.613 | 5367 | tags=34%, list=21%, signal=43% |
| V5CP2_Q2                  | 192 | 0.41566935 | 1.5250849 | 0          | 0.00493744 | 0.622 | 2516 | tags=21%, list=10%, signal=23% |
| V5STAT_Q1                 | 214 | 0.41071132 | 1.5248692 | 0          | 0.0049472  | 0.622 | 5532 | tags=39%, list=22%, signal=50% |
| V5P53_Q2                  | 210 | 0.41322288 | 1.5233305 | 0          | 0.00505224 | 0.631 | 4885 | tags=30%, list=19%, signal=36% |
| V5AP2_Q6_Q1               | 201 | 0.4143872  | 1.5219736 | 0          | 0.00511947 | 0.64  | 5306 | tags=36%, list=21%, signal=46% |
| V5CAKT1_Q1                | 180 | 0.4205784  | 1.5190113 | 0.00160256 | 0.00532855 | 0.657 | 3023 | tags=20%, list=12%, signal=23% |
| V5MF1_Q1                  | 214 | 0.4173623  | 1.518656  | 0          | 0.0054388  | 0.669 | 4952 | tags=33%, list=20%, signal=41% |
| V5SF1_Q6                  | 204 | 0.4127792  | 1.5185127 | 0          | 0.00535069 | 0.663 | 4736 | tags=30%, list=19%, signal=37% |
| V5IRF1_Q1                 | 202 | 0.41229278 | 1.5169601 | 0          | 0.0054428  | 0.667 | 3835 | tags=26%, list=15%, signal=31% |
| V5MEF2_Q3                 | 199 | 0.41216448 | 1.5167708 | 0          | 0.0054253  | 0.667 | 6045 | tags=34%, list=24%, signal=44% |
| V5CEBPDELTA_Q6            | 192 | 0.4177657  | 1.5162691 | 0          | 0.0054388  | 0.669 | 4736 | tags=30%, list=19%, signal=37% |
| V5PKR_Q2                  | 212 | 0.41157782 | 1.5157633 | 0          | 0.00545257 | 0.671 | 5464 | tags=37%, list=22%, signal=47% |
| V5TBP_Q1                  | 203 | 0.4129004  | 1.5153368 | 0          | 0.00547092 | 0.673 | 3881 | tags=22%, list=15%, signal=26% |
| V5HMK1_Q1                 | 36  | 0.53212595 | 1.5149045 | 0.02692308 | 0.0054897  | 0.676 | 4708 | tags=33%, list=19%, signal=41% |
| V5AP2_Q3                  | 303 | 0.4139933  | 1.5147847 | 0.00160256 | 0.00577733 | 0.681 | 4414 | tags=30%, list=19%, signal=36% |
| TGCTGAY_UNKNOWN           | 441 | 0.38410035 | 1.5141935 | 0          | 0.00550074 | 0.681 | 4727 | tags=29%, list=19%, signal=36% |
| V5SP1_Q6_Q1               | 179 | 0.41798806 | 1.5112747 | 0          | 0.00566192 | 0.687 | 5074 | tags=37%, list=20%, signal=47% |
| V5TCF1_Q1                 | 189 | 0.41674755 | 1.509832  | 0          | 0.00575686 | 0.697 | 4333 | tags=28%, list=17%, signal=34% |
| CCNNGSGAR_V5OLF1_Q1       | 263 | 0.4000943  | 1.5043924 | 0          | 0.00584598 | 0.711 | 4099 | tags=27%, list=17%, signal=34% |
| V5TEL2_Q6                 | 171 | 0.4142381  | 1.5042753 | 0          | 0.00614178 | 0.712 | 4854 | tags=35%, list=19%, signal=43% |
| V5GATA1_Q5                | 227 | 0.4060646  | 1.5042449 | 0.00154083 | 0.00612271 | 0.712 | 5169 | tags=33%, list=21%, signal=41% |
| V5ALPHAACP1_Q1            | 209 | 0.4088173  | 1.503605  | 0.00165289 | 0.00614901 | 0.712 | 5533 | tags=36%, list=22%, signal=46% |
| V5OLF1_Q1                 | 221 | 0.4094306  | 1.4998217 | 0.00158228 | 0.0062773  | 0.727 | 4058 | tags=24%, list=16%, signal=28% |
| V5NF1_Q6_Q1               | 215 | 0.40424126 | 1.4981571 | 0          | 0.0065566  | 0.741 | 4186 | tags=29%, list=17%, signal=34% |
| V5CIZ_Q1                  | 190 | 0.40862522 | 1.4968895 | 0.00472441 | 0.0066972  | 0.752 | 5547 | tags=35%, list=22%, signal=45% |
| V5MEI51_Q1                | 189 | 0.41186494 | 1.4966098 | 0.00163399 | 0.00668668 | 0.752 | 4646 | tags=29%, list=18%, signal=35% |
| ACTWSNACTNY_UNKNOWN       | 66  | 0.46716146 | 1.4952933 | 0.01054482 | 0.0067855  | 0.757 | 5798 | tags=41%, list=24%, signal=53% |
| V5IK2_Q1                  | 217 | 0.4042674  | 1.4928585 | 0          | 0.00695951 | 0.769 | 4205 | tags=26%, list=17%, signal=31% |
| V5HP1SITEFACTOR_Q6        | 194 | 0.4099446  | 1.4928447 | 0          | 0.00696474 | 0.769 | 4732 | tags=29%, list=19%, signal=36% |
| V5NMYC_Q1                 | 217 | 0.40212667 | 1.4926401 | 0          | 0.00696311 | 0.771 | 4538 | tags=32%, list=18%, signal=39% |
| TAAYNRNNTCC_UNKNOWN       | 140 | 0.42604497 | 1.489513  | 0.00165837 | 0.0072595  | 0.783 | 5285 | tags=31%, list=21%, signal=40% |
| V5NFK6_Q6_Q1              | 187 | 0.41007212 | 1.489276  | 0.00159236 | 0.0072626  | 0.786 | 4852 | tags=34%, list=20%, signal=42% |
| V5STAT1_Q1                | 55  | 0.49430287 | 1.486865  | 0.02210884 | 0.00748528 | 0.791 | 5044 | tags=42%, list=20%, signal=52% |
| V5HOXA4_Q2                | 218 | 0.40074226 | 1.4862827 | 0          | 0.00750626 | 0.792 | 5924 | tags=35%, list=24%, signal=46% |
| TAANNYSGGG_UNKNOWN        | 63  | 0.47444242 | 1.4846295 | 0.01413428 | 0.00762194 | 0.797 | 4661 | tags=44%, list=19%, signal=54% |
| WTTAAGGC_UNKNOWN          | 121 | 0.43177068 | 1.4825617 | 0.0034040  | 0.00779462 | 0.806 | 3646 | tags=26%, list=17%, signal=30% |
| V5RPS8_Q1                 | 186 | 0.40766916 | 1.4820172 | 0          | 0.00783339 | 0.805 | 4355 | tags=26%, list=17%, signal=32% |
| YGCAANTGCR_UNKNOWN        | 103 | 0.43935657 | 1.4815328 | 0.00661157 | 0.00787136 | 0.807 | 4931 | tags=34%, list=20%, signal=42% |
| V5PPARA_Q2                | 105 | 0.42444656 | 1.4799403 | 0.00692042 | 0.00798887 | 0.811 | 2915 | tags=24%, list=12%, signal=27% |
| V5FOXK_Q1                 | 199 | 0.40708116 | 1.479637  | 0          | 0.00798884 | 0.813 | 4973 | tags=31%, list=19%, signal=38% |
| TGGMNNNNKCCAR_UNKNOWN     | 332 | 0.38441548 | 1.4769592 | 0          | 0.00827881 | 0.824 | 4090 | tags=24%, list=16%, signal=29% |
| V5HFH1_Q1                 | 198 | 0.4093284  | 1.4752611 | 0.00156006 | 0.00844701 | 0.828 | 4962 | tags=27%, list=19%, signal=34% |
| V5TGIF_Q1                 | 187 | 0.40586546 | 1.4738735 | 0          | 0.0085842  | 0.831 | 4713 | tags=27%, list=19%, signal=33% |
| V5P53_DECAMER_Q2          | 151 | 0.39885747 | 1.4718924 | 0.0016     | 0.00865449 | 0.84  | 5467 | tags=37%, list=24%, signal=48% |
| YTTCCNNNGGAMR_UNKNOWN     | 37  | 0.5078941  | 1.4686892 | 0.03799655 | 0.00907459 | 0.851 | 4416 | tags=35%, list=18%, signal=43% |
| V5LXR_Q3                  | 61  | 0.46850148 | 1.4680699 | 0.01576182 | 0.00913152 | 0.856 | 4309 | tags=38%, list=17%, signal=45% |
| V5SMAD3_Q6                | 193 | 0.40549493 | 1.4673324 | 0.00652529 | 0.00921062 | 0.859 | 5611 | tags=34%, list=22%, signal=44% |
| V5FOX1_Q1                 | 192 | 0.4026776  | 1.4653882 | 0.00465839 | 0.00934405 | 0.863 | 4333 | tags=30%, list=19%, signal=36% |
| V5BRN2_Q1                 | 200 | 0.40109733 | 1.4652284 | 0.00462963 | 0.00933253 | 0.866 | 4710 | tags=31%, list=19%, signal=37% |
| V5FREAC4_Q1               | 120 | 0.42690524 | 1.460494  | 0.01192504 | 0.00977306 | 0.877 | 4050 | tags=23%, list=16%, signal=28% |
| V5PIT1_Q6                 | 200 | 0.40292558 | 1.45921   | 0.00819672 | 0.00992551 | 0.884 | 4821 | tags=30%, list=19%, signal=36% |
| V5CEBP_Q1                 | 218 | 0.3955636  | 1.4586787 | 0.00159495 | 0.00995642 | 0.887 | 4732 | tags=28%, list=19%, signal=36% |
| V5TAL1BETAITF2_Q1         | 205 | 0.4001791  | 1.457464  | 0          | 0.01009549 | 0.889 | 3048 | tags=22%, list=12%, signal=25% |
| V5EVI1_Q6                 | 20  | 0.5806355  | 1.4573501 | 0.04117647 | 0.01007562 | 0.889 | 3162 | tags=30%, list=13%, signal=34% |
| CCAWYNNGAAR_UNKNOWN       | 112 | 0.42485522 | 1.4560109 | 0.01369683 | 0.01018664 | 0.891 | 5540 | tags=34%, list=22%, signal=43% |
| V5RFL1_Q2                 | 202 | 0.39657424 | 1.453461  | 0.00156879 | 0.01038661 | 0.893 | 6099 | tags=38%, list=24%, signal=48% |
| GTTRYCATRR_UNKNOWN        | 129 | 0.41430914 | 1.4487114 | 0.0066778  | 0.01106714 | 0.908 | 5136 | tags=35%, list=20%, signal=44% |
| V5GR_Q6_Q1                | 211 | 0.39253774 | 1.446775  | 0.00474684 | 0.01129537 | 0.911 | 5900 | tags=33%, list=23%, signal=42% |
| V5S0X9_B1                 | 195 | 0.3993897  | 1.4465898 | 0.00470958 | 0.01127299 | 0.911 | 6318 | tags=41%, list=25%, signal=54% |
| V5MYOD_Q1                 | 205 | 0.39058092 | 1.4444209 | 0.00634921 | 0.01155888 | 0.919 | 5722 | tags=32%, list=23%, signal=41% |
| V5HAND1E47_Q1             | 216 | 0.39366078 | 1.4431123 | 0.00314465 | 0.01161127 | 0.92  | 4347 | tags=27%, list=17%, signal=30% |
| AAAYRNCTG_UNKNOWN         | 31  | 0.37449753 | 1.4419156 | 0          | 0.01184796 | 0.922 | 5067 | tags=33%, list=20%, signal=41% |
| V5NFY_Q6                  | 205 | 0.3911145  | 1.4400618 | 0.00310559 | 0.01198546 | 0.928 | 3860 | tags=26%, list=15%, signal=31% |
| V5AR_Q1                   | 112 | 0.4252596  | 1.4397427 | 0.0066335  | 0.01200109 | 0.929 | 5819 | tags=43%, list=23%, signal=56% |
| V5AP2GAMMA_Q1             | 201 | 0.3974956  | 1.4390986 | 0.00156086 | 0.01204238 | 0.93  | 4213 | tags=30%, list=17%, signal=33% |
| V5TATA_Q1                 | 225 | 0.39060307 | 1.4388157 | 0.00311042 | 0.01205387 | 0.932 | 4685 | tags=26%, list=19%, signal=31% |
| V5E47_Q1                  | 207 | 0.390714   | 1.4369321 | 0.00312012 | 0.0123555  | 0.939 | 4205 | tags=26%, list=17%, signal=30% |
| V5OCT1_Q7                 | 127 | 0.41229102 | 1.4354383 | 0.00998336 | 0.01258051 | 0.942 | 4533 | tags=28%, list=18%, signal=34% |
| V5GR_Q6                   | 221 | 0.38756925 | 1.4334089 | 0          | 0.01281492 | 0.947 | 4462 | tags=23%, list=18%, signal=28% |
| V5PPARG_Q1                | 34  | 0.50257266 | 1.4302602 | 0.04428044 | 0.01333404 | 0.954 | 4085 | tags=50%, list=16%, signal=60% |
| V5STAT5_Q1                | 205 | 0.38781828 | 1.4264894 | 0.00486224 | 0.01385354 | 0.96  | 4863 | tags=31%, list=19%, signal=38% |
| V5E2F_Q2                  | 130 | 0.40648556 | 1.423831  | 0.00827815 | 0.01424795 | 0.963 | 4978 | tags=30%, list=20%, signal=37% |
| V5AML1_Q6                 | 198 | 0.38595024 | 1.4194788 | 0          | 0.01495688 | 0.97  | 3765 | tags=27%, list=15%, signal=30% |
| V5AML_Q6                  | 210 | 0.3858928  | 1.4161267 | 0.00162338 | 0.01551469 | 0.971 | 3896 | tags=33%, list=15%, signal=37% |
| V5AP3_Q6                  | 210 | 0.3857878  | 1.4154922 | 0.0016129  | 0.0155755  | 0.972 | 4458 | tags=26%, list=18%, signal=32% |
| V5STAT5B_Q1               | 205 | 0.38838905 | 1.4149129 | 0.0048     | 0.01564007 | 0.973 | 4872 | tags=30%, list=19%, signal=37% |
| V5FOXK_Q2                 | 209 | 0.38338763 | 1.4144468 | 0.0048     | 0.01567545 | 0.977 | 4717 | tags=28%, list=18%, signal=35% |
| V5AR_Q2                   | 100 | 0.42371798 | 1.4130254 | 0.02054795 | 0.01589677 | 0.975 | 4014 | tags=26%, list=16%, signal=31% |
| V5OCT1_Q5_Q1              | 221 | 0.38276157 | 1.4122726 | 0.00646204 | 0.01602938 | 0.977 | 4674 | tags=24%, list=19%, signal=30% |
| V5APAT4_Q3                | 197 | 0.389669   | 1.4104489 | 0.00961539 | 0.01633475 | 0.981 | 5807 | tags=35%, list=23%, signal=45% |
| V5AREBE_Q4                | 211 | 0.38029078 | 1.4093529 | 0.0063681  | 0.01649866 | 0.983 | 4344 | tags=26%, list=17%, signal=30% |
| V5AML1_Q1                 | 198 | 0.38595024 | 1.4043257 | 0.00321027 | 0.01734834 | 0.988 | 3785 | tags=27%, list=15%, signal=31% |
| V5GATA1_Q1                | 196 | 0.3815784  | 1.4031935 | 0.00165017 | 0.01754049 | 0.988 | 5905 | tags=37%, list=23%, signal=48% |
| V5OCT1_B                  | 223 | 0.37837377 | 1.4022907 | 0.00783699 | 0.01766032 | 0.989 | 4755 | tags=26%, list=19%, signal=32% |
| RAAGYNNKCTTY_UNKNOWN      | 118 | 0.40352112 | 1.398706  | 0.01845636 | 0.01833911 | 0.99  | 2251 | tags=19%, list=10%, signal=21% |
| V5HFH3_Q1                 | 163 | 0.39106995 | 1.394893  | 0.00796178 | 0.01917338 | 0.992 | 6250 | tags=37%, list=25%, signal=49% |
| V5ELK1_Q1                 | 198 | 0.37804627 | 1.3932247 | 0.00324149 | 0.01948391 | 0.992 | 4842 | tags=31%, list=19%, signal=47% |
| YCATTAA_UNKNOWN           | 456 | 0.35588583 | 1.3915104 | 0          | 0.01982982 | 0.992 | 4789 | tags=28%, list=19%, signal=34% |
| V5FOX_Q2                  | 176 | 0.3821689  | 1.3875383 | 0.01149425 | 0.02066875 | 0.993 | 4816 | tags=30%, list=19%, signal=36% |
| V5HF3ALPHA_Q6             | 170 | 0.38589802 | 1.3875377 | 0.00465839 | 0.02061589 | 0.993 | 4853 | tags=34%, list=22%, signal=43% |
| GCKCATGS_UNKNOWN          | 47  | 0.46373765 | 1.3857762 | 0.05244123 | 0.02096426 | 0.995 | 5284 | tags=38%, list=21%, signal=48% |
| GCCNNWTAAR_UNKNOWN        | 121 | 0.40049118 | 1.3820851 | 0.01650165 | 0.02184796 | 0.996 | 4652 | tags=33%, list=19%, signal=40% |
| V5DBP_Q6                  | 210 | 0.37633705 | 1.3814049 | 0.00834579 | 0.02195456 | 0.996 | 5985 |                                |

|                         |     |            |           |            |            |   |      |                                |
|-------------------------|-----|------------|-----------|------------|------------|---|------|--------------------------------|
| V\$AR_Q6                | 199 | 0.36071855 | 1.3158327 | 0.0275974  | 0.04093747 | 1 | 3589 | tags=22%, list=14%, signal=25% |
| RYAAAKNNNNNTTGW_UNKNOWN | 73  | 0.4140661  | 1.312719  | 0.06642729 | 0.042243   | 1 | 4636 | tags=25%, list=18%, signal=30% |
| V\$FREAC3_01            | 201 | 0.35781586 | 1.3123251 | 0.02842809 | 0.04233563 | 1 | 4686 | tags=29%, list=19%, signal=35% |
| V\$AMEF2_Q6             | 214 | 0.35605097 | 1.3119632 | 0.01658375 | 0.04242189 | 1 | 5464 | tags=29%, list=22%, signal=36% |
| YRCCAKNNGNCGC_UNKNOWN   | 56  | 0.4250664  | 1.3074657 | 0.08576642 | 0.04441057 | 1 | 6702 | tags=52%, list=27%, signal=70% |
| TTCYNRGAA_V\$STATSB_01  | 268 | 0.3450896  | 1.3074465 | 0.0124805  | 0.044311   | 1 | 4872 | tags=28%, list=19%, signal=34% |
| AGCYRWITTC_UNKNOWN      | 93  | 0.39165226 | 1.3072801 | 0.03244123 | 0.04428724 | 1 | 5434 | tags=39%, list=22%, signal=49% |
| V\$HNF4ALPHA_Q6         | 225 | 0.35547775 | 1.304016  | 0.014377   | 0.04580284 | 1 | 3956 | tags=31%, list=16%, signal=36% |
| V\$RORA1_01             | 206 | 0.35328615 | 1.3012671 | 0.02457757 | 0.04699724 | 1 | 4852 | tags=29%, list=19%, signal=36% |
| V\$MYB_Q5_01            | 206 | 0.35430756 | 1.3004733 | 0.03064516 | 0.04722836 | 1 | 3691 | tags=23%, list=15%, signal=27% |
| V\$NKXG1_01             | 190 | 0.35291773 | 1.2985561 | 0.03410853 | 0.04810653 | 1 | 4394 | tags=26%, list=17%, signal=32% |
| V\$CDP_02               | 93  | 0.3905215  | 1.2975351 | 0.07363014 | 0.04847124 | 1 | 3955 | tags=20%, list=16%, signal=24% |
| V\$POUGF1_01            | 195 | 0.3576936  | 1.2973076 | 0.02601626 | 0.04845662 | 1 | 5685 | tags=30%, list=23%, signal=38% |
| V\$PAX_Q6               | 212 | 0.35127556 | 1.2967829 | 0.02917342 | 0.04862552 | 1 | 4962 | tags=28%, list=20%, signal=34% |
| V\$LBPI_Q6              | 172 | 0.36112624 | 1.2965438 | 0.03354633 | 0.04862787 | 1 | 4147 | tags=24%, list=16%, signal=29% |
