# Supplementary material
Source: PubMed Central journal article supplement (PMC3070548)

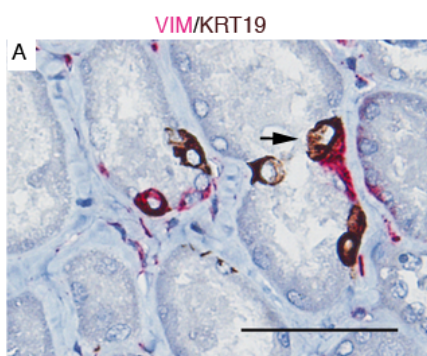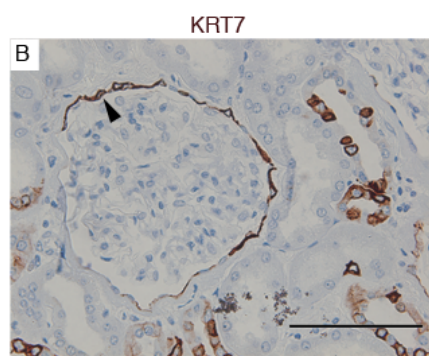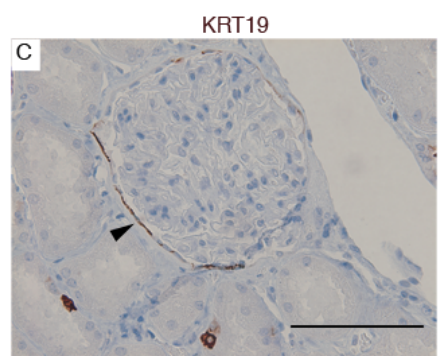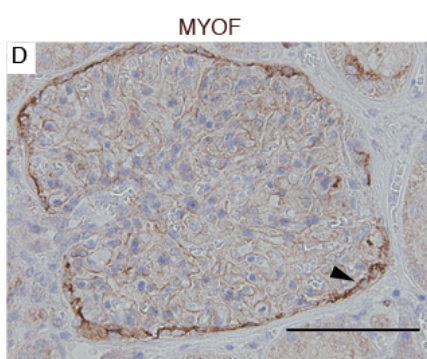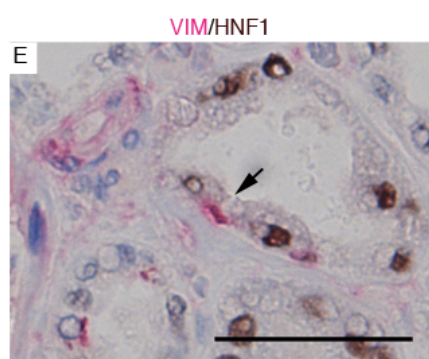

Supplement: mmc1.pdf [file mmc1.pdf]

**A**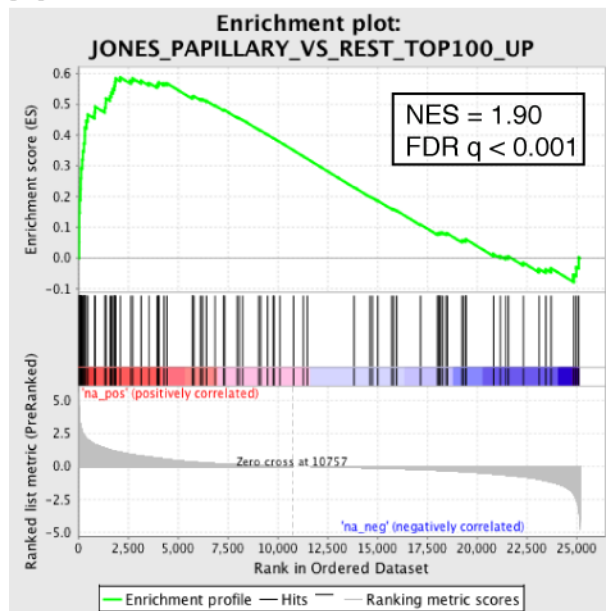**B**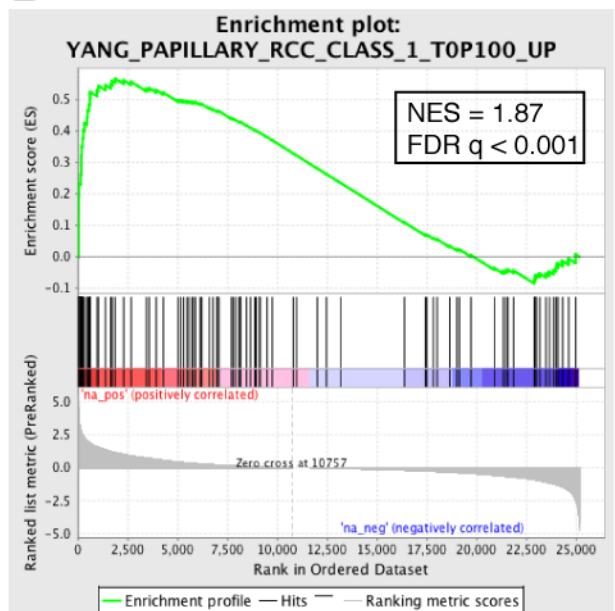

Supplement: mmc2.pdf [file mmc2.pdf]

KRT19

Normal kidney

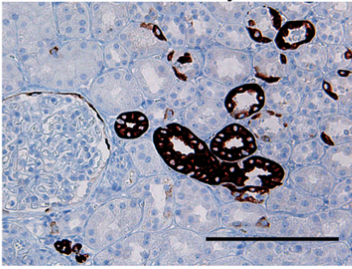

Adenoma

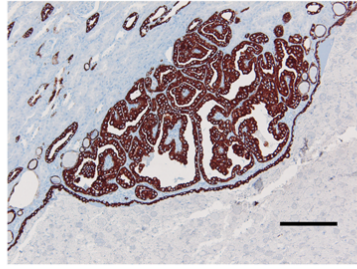

pRCC type 1

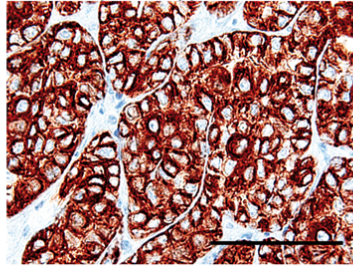

pRCC type 2

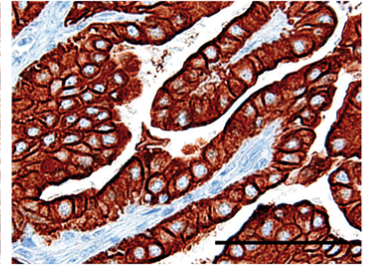

Supplement: mmc3.pdf [file mmc3.pdf]
